# Supplementary material for: Evidence for the effectiveness of minimum pricing of alcohol: a systematic review and assessment using the Bradford Hill criteria for causality
Source: PubMed Central journal article supplement (PMC5777460; doi:10.1136/bmjopen-2016-013497), 2017-06-06
Supplement: bmjopen-2016-013497.draft_revisions.pdf [file bmjopen-2016-013497.draft_revisions.pdf]

# BMJ Open

## Evidence for the effectiveness of minimum pricing of alcohol: a systematic review and assessment using the Bradford Hill criteria for causality

|                                 |                                                                                                                                                                                                                                                                                                                                                         |
|---------------------------------|---------------------------------------------------------------------------------------------------------------------------------------------------------------------------------------------------------------------------------------------------------------------------------------------------------------------------------------------------------|
| Journal:                        | <i>BMJ Open</i>                                                                                                                                                                                                                                                                                                                                         |
| Manuscript ID                   | bmjopen-2016-013497                                                                                                                                                                                                                                                                                                                                     |
| Article Type:                   | Research                                                                                                                                                                                                                                                                                                                                                |
| Date Submitted by the Author:   | 15-Jul-2016                                                                                                                                                                                                                                                                                                                                             |
| Complete List of Authors:       | Boniface, Sadie; King's College London, National Addiction Centre, Institute of Psychiatry, Psychology and Neuroscience<br>Scannell, Jack; University of Edinburgh, Innogen Institute, School of Social and Political Sciences<br>Marlow, Sally; King's College London, National Addiction Centre, Institute of Psychiatry, Psychology and Neuroscience |
| <b>Primary Subject Heading</b>: | Public health                                                                                                                                                                                                                                                                                                                                           |
| Secondary Subject Heading:      | Addiction                                                                                                                                                                                                                                                                                                                                               |
| Keywords:                       | alcohol, policy, minimum unit pricing, PUBLIC HEALTH, Bradford Hill                                                                                                                                                                                                                                                                                     |
|                                 |                                                                                                                                                                                                                                                                                                                                                         |

SCHOLARONE™  
Manuscripts

1  
2  
3 **Evidence for the effectiveness of minimum pricing of alcohol: a systematic**  
4 **review and assessment using the Bradford Hill criteria for causality**  
5  
6

7 Sadie Boniface,<sup>1</sup> Jack W Scannell,<sup>2</sup> Sally Marlow<sup>1</sup>  
8

9 <sup>1</sup>National Addiction Centre, Institute of Psychiatry, Psychology and Neuroscience, King's College  
10 London, London, UK  
11

12 <sup>2</sup>School of Social and Political Science, University of Edinburgh, Edinburgh, UK  
13

14 Corresponding author: Dr Sadie Boniface, National Addiction Centre, Addiction Sciences Building (PO  
15 48) Institute of Psychiatry, Psychology and Neuroscience, 16 De Crespigny Park, King's College  
16 London, SE5 8AF. [sadie.boniface@kcl.ac.uk](mailto:sadie.boniface@kcl.ac.uk) 020 7848 5097  
17

18 Keywords: alcohol, policy, minimum unit pricing, public health, Bradford Hill  
19

20 Word count: 3,128 (excluding title page, abstract, references, figures and tables)  
21  
22  
23  
24  
25  
26  
27  
28  
29  
30  
31  
32  
33  
34  
35  
36  
37  
38  
39  
40  
41  
42  
43  
44  
45  
46  
47  
48  
49  
50  
51  
52  
53  
54  
55  
56  
57  
58  
59  
60

## ABSTRACT

**Objectives:** To assess the evidence for price-based alcohol interventions to determine whether minimum unit pricing policies are likely to be effective.

**Design:** Systematic review and assessment of studies according to PRISMA guidelines, against the Bradford Hill criteria for causality. Three electronic databases were searched from inception to February 2016. Additional articles were found through hand searching and grey literature searches.

**Criteria for selecting studies:** We included any study design that reported on the effect of price changes and price-based interventions on alcohol consumption or alcohol-related morbidity, mortality, and wider harms. Studies reporting on the effects of taxation or affordability, and studies that only investigated price elasticity of demand were beyond the scope of this review. Studies with any conflict of interest were excluded. All studies were appraised for methodological quality.

**Results:** Of 756 studies assessed, 35 studies were included: 28 peer-reviewed research studies and 7 from the grey literature. All nine of the Bradford Hill criteria were met, although different types of study satisfied different criteria. For example, modelling studies complied with the consistency and specificity criteria, time series analyses demonstrated the temporality and experiment criteria, and the analogy criterion was fulfilled by comparing the findings with the wider literature on taxation and affordability.

**Conclusions:** Overall, the Bradford-Hill criteria for causality were satisfied. There was very little evidence that alcohol price was not associated with consumption or subsequent harms. However the overall quality of the evidence was variable, a large proportion of the evidence base has been produced by a small number of research teams, and the quantitative uncertainty in many estimates or forecasts is poorly communicated in the literature. None the less, price-based alcohol policy interventions such as minimum unit pricing are likely to reduce alcohol consumption, alcohol-related morbidity and mortality.

## ARTICLE SUMMARY

### Strengths and limitations of this study

- This review adds to an emerging literature of systematic reviews synthesising findings using the Bradford Hill criteria for causality in research areas where traditional meta-analyses of randomised controlled trials are not possible or appropriate
- A range of study designs were included, allowing for a comprehensive review of a disparate evidence base to investigate whether minimum unit pricing of alcohol is likely to reduce alcohol consumption and alcohol-related harm
- Studies examining the effects of alcohol taxation or changes in alcohol affordability, or studies solely reporting on price elasticity of demand, were not included
- Methodological quality of studies was variable

## INTRODUCTION

Alcohol-related harm costs the NHS £3.5bn each year and the estimated cost to society is £21 billion per year (1). The latest annual figures for England show over one million alcohol-related hospital admissions (2013/14) and six and a half thousand alcohol-related deaths (2013); and these figures represent increases compared with a decade previously of 115% and 10% respectively (1). There are many policies and programmes that aim to reduce harms from alcohol (2), and one of these is minimum pricing. Minimum pricing for alcohol has been introduced in a number of countries around the world including Canada (3), Belarus, Kyrgyzstan, the Republic of Moldova, the Russian Federation and Ukraine (4). In 2012 the UK coalition Government cited support for minimum unit pricing (MUP) in its alcohol strategy (5), and legislation to have a minimum price of £0.50 per unit (one UK unit = 10ml or 8g ethanol) was passed in Scotland the same year (4). In England and Wales there has been a ban on alcohol being sold at below cost (the total amount of 'duty plus VAT') since May 2014 (6); and the first conviction for selling alcohol below this level recently took place (7). Duty plus VAT is equivalent to a 70cl bottle of vodka (37.5% ABV) costing a minimum of £8.72 (8), whereas under a minimum price of 50 pence per unit this would cost £13.13.

Subsequent to the publication of the UK Alcohol Strategy, the Government has withdrawn its support for MUP. There have also been discussions in the Scottish courts between health organisations and the alcohol industry around the legality of MUP, proportionality (that the same objective cannot be met through increased taxation), and whether there is sufficient evidence. In a recent report about the extent to which UK alcohol policies are evidence-based, Fitzgerald and Angus wrote that "there are also a number of notable instances of policies being rejected due to 'insufficient evidence' with little indication of what level of evidence would be considered to be 'sufficient'" (9).

Taxation and price interventions are sometimes considered analogous, however it is at the retailers' discretion whether or not to pass on tax increases to consumers, but this is not the case for MUP. In this paper, we assess the effect of price and price-based interventions as MUP is currently being considered as a policy option in the United Kingdom. We systematically review the literature on the effect of price changes or policies such as MUP on alcohol consumption, alcohol-related morbidity and mortality, and wider harms. We use the nine Bradford Hill criteria for causality as a framework with the aim of assessing the likely effectiveness of MUP as a policy to reduce alcohol consumption and alcohol-related harm.

## METHODS

A systematic literature search was performed according to Preferred Reporting Items for Systematic Reviews and Meta-Analyses (PRISMA) guidance (see Figure 1 for PRISMA flow diagram and online supplementary file for excluded studies).

### Identification of studies

Three electronic databases were searched for titles or abstracts containing "minimum unit price" OR "minimum price" OR "floor price" OR "price AND policy" AND alcohol. The databases were PsycINFO (1806 to February Week 1 2016), Embase (1974 to 2016 Week 07), Ovid Medline (1946 to

1  
2  
3 February Week 1 2016). We also searched the websites of five alcohol charities for publications or  
4 reports related to “price”, and also searched 20 leading UK think tanks for “alcohol” or “addiction”.

5  
6 Inclusion criteria were: any study design; population level studies exploring at least one aspect of the  
7 effect of changes in the price of alcohol, including but not limited to changes in alcohol sales,  
8 consumption, morbidity and mortality; individual level studies exploring differences in price paid for  
9 alcohol, and alcohol purchasing, consumption, morbidity and mortality; written in English.

10  
11 Exclusion criteria were: studies about taxation, affordability and price elasticity of demand for  
12 alcohol (there is a large literature on each of these already and reviewing all of these studies was  
13 beyond the scope of this review); studies about public perceptions of MUP; studies where a conflict  
14 of interest was evident, whether in favour of or against MUP.  
15  
16

17  
18 All 37 studies that met the inclusion criteria were assessed against the Bradford Hill criteria for  
19 causality and the methodological quality appraised. These included 28 original research studies, 2  
20 systematic reviews, and 7 studies from the grey literature. Of the 28 research studies, there were 12  
21 cross sectional surveys, 10 time series analyses or similar, 4 econometric modelling studies, one  
22 qualitative study, and one trial.  
23

#### 24 25 **Analysis of included studies**

26  
27 Quality of included studies was assessed independently by two reviewers and using validated tools.  
28 Due to the wide variation in study designs among the included studies, the Effective Public Health  
29 Practice Project’s (EPHPP) tool was used for assessing all quantitative studies, as recommended by  
30 the Cochrane Handbook for assessing studies in public health (10). Qualitative studies (n=1) and  
31 systematic reviews (n=2) included in this review were not covered by the EPHPP tool and so were  
32 assessed using the Critical Appraisal Skills Programme (CASP) tools specific to these study designs.  
33  
34

35  
36 Nine criteria in order to determine causality were suggested by Bradford Hill in an influential 1965  
37 paper (11). Increasingly, the Bradford Hill criteria are a standard framework to assess the impact of  
38 interventions where it is not ethical or practical to conduct randomised controlled trials. Our  
39 interpretation of the Bradford Hill criteria for the purpose of this review is listed in Table 1. Two  
40 reviewers assessed each study against each of the nine criteria and agreed which studies provided  
41 relevant evidence for or against each criterion.  
42  
43  
44  
45  
46  
47  
48  
49  
50  
51  
52  
53  
54  
55  
56  
57  
58  
59  
60

Table 1: Bradford Hill criteria for assessing causation and the definitions used in this review

| Criterion                            | Bradford Hill criteria (1965)                                                                                                                                                                                                                                                         | Application in this review                                                                                                                                                                                                                                                          |
|--------------------------------------|---------------------------------------------------------------------------------------------------------------------------------------------------------------------------------------------------------------------------------------------------------------------------------------|-------------------------------------------------------------------------------------------------------------------------------------------------------------------------------------------------------------------------------------------------------------------------------------|
| 1. Strength of the association       | The strength of a supposed association between an intervention and an outcome is determined by the appropriate statistic used to measure the protective effect of an intervention (e.g. relative risk or odds ratio). This is the most important factor determining causation         | A statistically significant change ( $P < 0.05$ ) in alcohol consumption or alcohol related harms, in the expected direction. The exact magnitude of the association was assessed on a study by study basis                                                                         |
| 2. Consistency                       | Has it been repeatedly observed by different persons, in different places, circumstances and times?                                                                                                                                                                                   | Whether different studies conducted in different locations, in different populations, by different investigators and at different times have reported similar findings                                                                                                              |
| 3. Specificity                       | Specificity is present when the intervention is exclusive to the outcome and when the outcome has no other known cause or associated risk factors; cautions that this criterion should not be overemphasized and that if specificity is not apparent this does not preclude causation | If pricing was the only reason that alcohol consumption or alcohol-related harm could have fallen, this adds to the argument for causality. However if a price intervention was one of a number of alcohol policy interventions, then this criterion is not satisfied               |
| 4. Temporality                       | Refers to temporal relationship of association between exposure and disease outcome; to infer causality, exposure must precede outcome                                                                                                                                                | The pricing intervention studied must have taken place before a change in alcohol consumption or harm was observed                                                                                                                                                                  |
| 5. Dose-response/biological gradient | If the association is one in which a dose-response curve or biological gradient can be observed, this adds to the case for causality                                                                                                                                                  | If interventions leading to a larger increase in prices had a greater effect on alcohol consumption and alcohol related harm than interventions where the price change was small, or if studies demonstrate that different prices have differing effects, in the expected direction |
| 6. Plausibility (biological)         | A likely biological mechanism linking the intervention to the observed findings helps to explain causality, plausibility depends on biological knowledge of the day                                                                                                                   | It is well-established that alcohol consumption causes health and social harm. Studies that found an association between price and alcohol-related harms could demonstrate plausibility                                                                                             |
| 7. Coherence                         | When the evidence from different disciplines sources "hangs well together" and does not conflict with other generally known facts, this criterion is met                                                                                                                              | Describes whether studies conducted in different settings or disciplines had complementary findings. Will not be demonstrated by a single study in isolation but rather the evidence base as a whole                                                                                |
| 8. Experiment                        | Experimental evidence from laboratory studies or RCTs could potentially provide strongest support for causation                                                                                                                                                                       | In addition to laboratory studies and RCTs, natural experiments with before-and-after measures could also show the                                                                                                                                                                  |

|            |                                                                                                                                                                |                                                                                                                                                                                                                                     |
|------------|----------------------------------------------------------------------------------------------------------------------------------------------------------------|-------------------------------------------------------------------------------------------------------------------------------------------------------------------------------------------------------------------------------------|
|            | This criterion often provides the strongest support for causation and describes whether there is empirical evidence for the association                        | effectiveness of minimum unit pricing in a 'real world' setting                                                                                                                                                                     |
| 9. Analogy | Causality is supported by analogy if there are similar associations or causal relationships in other areas of relevance, weakest form of evidence of causality | Other areas of relevance include whether higher taxation on alcohol is associated with reduced alcohol consumption and alcohol related harm, and may require drawing on additional literature outside of the main systematic review |

**RESULTS**

The included studies that are published in peer-reviewed journals (28 research studies and two systematic reviews) are listed in Table 2 with study characteristics and methodological quality. Of the research studies, the methodological quality was rated as 'strong' in 12 studies, 'moderate' in 12 studies, and 'weak' in 4 studies. Both of the systematic reviews were rated 'strong'. The seven reports from the grey literature are listed in Table 3. Five of the seven were rated as of 'strong' methodological quality, with the remaining two not appropriate to rate using our critical appraisal tool.

For peer review only



Table 2: Studies published in peer-reviewed journals included in Bradford Hill criteria assessment

|                           | First author and year published | Study characteristics |                                        |                                                                                       |                                                                                             |                                                                | Study assessment |                      |                | Bradford Hill criteria met* |
|---------------------------|---------------------------------|-----------------------|----------------------------------------|---------------------------------------------------------------------------------------|---------------------------------------------------------------------------------------------|----------------------------------------------------------------|------------------|----------------------|----------------|-----------------------------|
|                           |                                 | Country               | Study design                           | Population or participants                                                            | Pricing intervention studied                                                                | Outcomes studied                                               | Peer-reviewed    | Conflict of interest | Quality rating |                             |
| Original research studies | Babor 1978 (12)                 | USA                   | Trial (not randomised)                 | 34 male volunteers in live-in research facility                                       | 'Happy Hour' with a reduction in price of alcohol for one group of participants             | Alcohol consumption                                            | Yes              | Not stated           | Weak           | SA, CON, SP, TE, CO, EX     |
|                           | Bhattacharya 2013 (13)          | Russia                | Time series analysis of panel data set | Populations of 77 Russian oblasts (provinces), 1970-2000                              | Substantial increases in alcohol prices 1985-1988, along with 6 other anti-alcohol measures | Mortality                                                      | Yes              | Not stated           | Strong         | SA, CON, TE, PL, CO, EX,    |
|                           | Black 2011(14)                  | Scotland              | Cross-sectional survey                 | 377 hospital patients with serious alcohol problems                                   | Mean price paid per unit                                                                    | Alcohol consumption                                            | Yes              | None                 | Moderate       | SA CON, DR, CO,             |
|                           | Brennan 2014 (15)               | England               | Modelling study using SAPM             | UK national surveys of general population (subgroups of moderate, harmful, hazardous) | MUP of £0.40, £0.45 and £0.50. Ban on below cost selling                                    | Alcohol consumption, consumer spending, 47 health harms, QALYs | Yes              | None                 | Strong         | CON, SP, DR, PL, CO         |
|                           | Byrnes 2013                     | Australia             | Repeated                               | 79,545 adults                                                                         | Modelled 1%                                                                                 | Alcohol                                                        | Yes              | Not                  | Moderate       | SA (low                     |

| First author and year published | Study characteristics |                        |                                                                                        |                                          |                                                       | Study assessment |                      |                | Bradford Hill criteria met*             |
|---------------------------------|-----------------------|------------------------|----------------------------------------------------------------------------------------|------------------------------------------|-------------------------------------------------------|------------------|----------------------|----------------|-----------------------------------------|
|                                 | Country               | Study design           | Population or participants                                                             | Pricing intervention studied             | Outcomes studied                                      | Peer-reviewed    | Conflict of interest | Quality rating |                                         |
| (16)                            |                       | cross-sectional survey |                                                                                        | increase in the price of alcohol         | consumption (with a focus on high intensity drinking) |                  | stated               | e              | drinking intensity only), CON (counter) |
| Callinan 2015 (17)              | Australia             | Cross-sectional survey | Drinkers 18+ participating in Australian International Alcohol Control study (n=1,681) | Price paid for alcohol                   | Alcohol consumption                                   | Yes              | Not stated           | Moderate       | SA, CON, DR, CO                         |
| Casswell 2014 (18)              | New Zealand           | Cross-sectional survey | Drinkers 18+ participating in NZ International Alcohol Control study (n=1,900)         | Price paid per drink in on and off trade | Alcohol consumption                                   | Yes              | Not stated           | Strong         | SA, CON, CO                             |
| Crawford 2012 (19)              | England               | Cross-sectional survey | 515 members of the public                                                              | Median price paid per unit               | AUDIT score                                           | Yes              | None                 | Moderate       | SA, CON, CO                             |
| Falkner 2015 (20)               | New Zealand           | Cross-sectional survey | 115 adults undergoing alcohol detoxification                                           | Price paid for alcohol                   | Alcohol consumption                                   | Yes              | No                   | Moderate       | SA, CON, CO                             |
| Forsyth 2014 (21)               | Scotland              | Cross-sectional survey | Shopkeepers of 144 off licences in Glasgow                                             | MUP of £0.50                             | Products affected, and hospital admissions            | Yes              | None                 | Weak           | CON, PL (weakly), CO                    |
| Gilligan 2012 (22)              | 40 European           | Cross-sectional        | Adolescents aged 15-16 from                                                            | Alcohol price as a % of EU               | Weekly drinking and                                   | Yes              | Not stated           | Weak           | SA, CON, DR, CO                         |

Bradford-Hill assessment of the evidence for minimum pricing of alcohol

9

| First author and year published | Study characteristics        |                            |                                                                                       |                                                                                                              |                                                                | Study assessment |                      |                | Bradford Hill criteria met*                                                |
|---------------------------------|------------------------------|----------------------------|---------------------------------------------------------------------------------------|--------------------------------------------------------------------------------------------------------------|----------------------------------------------------------------|------------------|----------------------|----------------|----------------------------------------------------------------------------|
|                                 | Country                      | Study design               | Population or participants                                                            | Pricing intervention studied                                                                                 | Outcomes studied                                               | Peer-reviewed    | Conflict of interest | Quality rating |                                                                            |
|                                 | and North American countries | survey and policy analysis | two large cross-country surveys (HBSC & ESPAD)                                        | average                                                                                                      | drunkenness                                                    |                  |                      |                | (some counter findings)                                                    |
| Herttua 2015 (23)               | Finland                      | Time series analysis       | General population using population registry                                          | Modelled 1% increase in the average minimum price of all alcoholic beverages based on actual price increases | Alcohol related mortality                                      | Yes              | None                 | Strong         | SA (not universal findings – subgroup only), CON (counter), TE, PL, CO, EX |
| Holmes 2014 (24)                | England                      | Modelling study using SAPM | UK national surveys of general population (subgroups of moderate, harmful, hazardous) | MUP of 45p                                                                                                   | Alcohol consumption, consumer spending, 47 health harms, QALYs | Yes              | None                 | Strong         | CON, SP, PL, CO                                                            |
| Ludbrook 2012 (25)              | UK                           | Cross-sectional survey     | Expenditure and Food Survey data from 2006-8 (n=18,624)                               | Purchasers of alcohol less than £0.45 per unit                                                               | Income of purchasers of cheap alcohol                          | Yes              | Not stated           | Moderate       | SA, CON, CO                                                                |
| Meier 2009 (26)                 | UK                           | Modelling study using SAPM | UK national surveys of general population (subgroups of                               | 10 pricing policy options, including different levels of MUP (of 33                                          | Alcohol consumption, consumer spending, 47 health harms,       | Yes              | None                 | Strong         | CON, SP, DR, PL, CO                                                        |

1  
2  
3  
4  
5  
6  
7  
8  
9  
10  
11  
12  
13  
14  
15  
16  
17  
18  
19  
20  
21  
22  
23  
24  
25  
26  
27  
28  
29  
30  
31  
32  
33  
34  
35  
36  
37  
38  
39  
40  
41  
42  
43  
44  
45  
46  
47  
48  
49

| First author and year published | Study characteristics |                                    |                                                                                       |                                            |                                                                | Study assessment |                      |                | Bradford Hill criteria met* |
|---------------------------------|-----------------------|------------------------------------|---------------------------------------------------------------------------------------|--------------------------------------------|----------------------------------------------------------------|------------------|----------------------|----------------|-----------------------------|
|                                 | Country               | Study design                       | Population or participants                                                            | Pricing intervention studied               | Outcomes studied                                               | Peer-reviewed    | Conflict of interest | Quality rating |                             |
|                                 |                       |                                    | moderate, harmful, hazardous)                                                         | analysed)                                  | crime, employment                                              |                  |                      |                |                             |
| Purshouse 2010 (27)             | England               | Modelling study using SAPM         | UK national surveys of general population (subgroups of moderate, harmful, hazardous) | 18 different pricing policies              | Alcohol consumption, consumer spending, 47 health harms, QALYs | Yes              | None                 | Strong         | CON, SP, DR, PL, CO         |
| Seaman 2013 (28)                | Scotland              | Qualitative study                  | 130 participants aged 16-30                                                           | Hypothetical price increases               | Alcohol consumption and substitution with other substances     | Yes              | None                 | Moderate       | CON, CO                     |
| Sharma 2014 (29)                | Australia             | Cross-sectional survey             | Representative sample of households (n=885) completing shopping survey                | MUP of A\$1, and taxation                  | Alcohol consumption (measured by projected sales)              | Yes              | None                 | Moderate       | SA, CON, DR, CO             |
| Sheron 2014 (30)                | UK                    | Cross-sectional survey             | Adult patients in a liver unit of a hospital (n=204)                                  | Median and mean price paid per unit        | Alcohol consumption                                            | Yes              | Not stated           | Moderate       | SA, CON, DR, CO             |
| Sloan 1994 (31)                 | USA                   | Analysis of routine data 1982-1988 | Population of USA                                                                     | Real price (based on off-trade price data) | Alcohol related mortality                                      | Yes              | Not stated           | Moderate       | SA, CON, CO (partially)     |

1  
2  
3  
4  
5  
6  
7  
8  
9  
10  
11  
12  
13  
14  
15  
16  
17  
18  
19  
20  
21  
22  
23  
24  
25  
26  
27  
28  
29  
30  
31  
32  
33  
34  
35  
36  
37  
38  
39  
40  
41  
42  
43  
44  
45  
46  
47  
48  
49

| First author and year published | Study characteristics |                                                              |                                                        |                                                                                                                                             |                                          | Study assessment |                      |                | Bradford Hill criteria met* |
|---------------------------------|-----------------------|--------------------------------------------------------------|--------------------------------------------------------|---------------------------------------------------------------------------------------------------------------------------------------------|------------------------------------------|------------------|----------------------|----------------|-----------------------------|
|                                 | Country               | Study design                                                 | Population or participants                             | Pricing intervention studied                                                                                                                | Outcomes studied                         | Peer-reviewed    | Conflict of interest | Quality rating |                             |
| Stockwell 2012 (3)              | Canada                | Cross-section versus time series analysis of ecological data | Population of British Columbia                         | Actual minimum price increased over a 20 year period. Study modelled a 10% increase in the average minimum price of all alcoholic beverages | Alcohol consumption (measured by sales)  | Yes              | None                 | Strong         | SA, CON, TE, DR, CO, EX     |
| Stockwell 2012 (32)             | Canada                | Cross-section versus time series analysis of ecological data | Population of Saskatchewan                             | Actual minimum price increased over a 7 year period. Study modelled a 10% increase in the average minimum price of all alcoholic beverages  | Alcohol consumption (measured by sales)  | Yes              | Not stated           | Strong         | SA, CON, TE, DR, CO, EX     |
| Stockwell 2013 (33)             | Canada                | Cross-section versus time series analysis of ecological data | Populations of 89 geographic areas in British Columbia | Actual minimum price increased over a 20 year period. Study modelled 10% increase in the average minimum price of all alcoholic             | Alcohol-attributable hospital admissions | Yes              | Not stated           | Strong         | SA, CON, TE, DR, PL, CO, EX |

1  
2  
3  
4  
5  
6  
7  
8  
9  
10  
11  
12  
13  
14  
15  
16  
17  
18  
19  
20  
21  
22  
23  
24  
25  
26  
27  
28  
29  
30  
31  
32  
33  
34  
35  
36  
37  
38  
39  
40  
41  
42  
43  
44  
45  
46  
47  
48  
49

| First author and year published | Study characteristics |                                                                             |                                                              |                                                                                                        |                                                             | Study assessment |                      |                | Bradford Hill criteria met* |
|---------------------------------|-----------------------|-----------------------------------------------------------------------------|--------------------------------------------------------------|--------------------------------------------------------------------------------------------------------|-------------------------------------------------------------|------------------|----------------------|----------------|-----------------------------|
|                                 | Country               | Study design                                                                | Population or participants                                   | Pricing intervention studied                                                                           | Outcomes studied                                            | Peer-reviewed    | Conflict of interest | Quality rating |                             |
|                                 |                       |                                                                             |                                                              | beverages                                                                                              |                                                             |                  |                      |                |                             |
| Sutton 1995 (34)                | UK                    | Cross-sectional survey                                                      | Participants in national General Household Survey, 1978-1990 | National expenditure figures on alcohol price                                                          | Alcohol consumption                                         | Yes              | Not stated           | Moderate       | CON, CO                     |
| Treisman 2010 (35)              | Russia                | Secondary analysis of historical data with focus on price changes 1990-1994 | Population of Russia                                         | Decrease in price of vodka in early 1990s - in 1993 real price of vodka was around 25% of that in 1990 | Mortality                                                   | Yes              | Not stated           | Strong         | SA, CON, TE, PL, CO, EX     |
| Wald 1984 (36)                  | Poland                | Analysis of routine data 1970-1981                                          | Population of Poland                                         | Poor harvest led to high prices, rationing and illegal sales                                           | Alcohol consumption and alcohol-related hospital admissions | Yes              | Not stated           | Weak           | CON, TE, PL, CO, EX         |
| Wall 2013 (37)                  | New Zealand           | Time series + econometric modelling                                         | Population of New Zealand                                    | Real price (and also affordability)                                                                    | Alcohol consumption                                         | Yes              | None                 | Moderate       | CON, CO (counter)           |
| Zhao 2013 (38)                  | Canada                | Cross-section versus time series                                            | Populations of 16 Health Service Delivery Areas in British   | Actual minimum price increased over a 20 year period. Study                                            | Acute, chronic and wholly alcohol                           | Yes              | None                 | Strong         | SA, CON, TE, DR, PL, CO, EX |

|                    | First author and year published | Study characteristics |                                     |                                            |                                                                                                              |                                                                                                                                | Study assessment |                      |                | Bradford Hill criteria met* |
|--------------------|---------------------------------|-----------------------|-------------------------------------|--------------------------------------------|--------------------------------------------------------------------------------------------------------------|--------------------------------------------------------------------------------------------------------------------------------|------------------|----------------------|----------------|-----------------------------|
|                    |                                 | Country               | Study design                        | Population or participants                 | Pricing intervention studied                                                                                 | Outcomes studied                                                                                                               | Peer-reviewed    | Conflict of interest | Quality rating |                             |
|                    |                                 |                       | analysis of ecological data         | Columbia, Canada                           | modelled 10% increase in the average minimum price of all alcoholic beverages. Also looked at outlet density | attributable mortality                                                                                                         |                  |                      |                |                             |
| Systematic reviews | Wagenaar 2009 (39)              | Worldwide             | Systematic review and meta-analysis | Studies tended to cover general population | Alcohol price and taxation interventions studied together                                                    | Alcohol consumption (measured by alcohol sales or self-reported consumption)                                                   | Yes              | None                 | Strong         | AN                          |
|                    | Wagenaar 2010 (40)              | Worldwide             | Systematic review and meta-analysis | Studies tended to cover general population | Alcohol price and taxation interventions studied together                                                    | Alcohol-related morbidity (disease, injury, suicide, traffic crashes, sexually transmitted diseases, other drug use, crime and | Yes              | Not stated           | Strong         | AN                          |

1  
2  
3  
4  
5  
6  
7  
8  
9  
10  
11  
12  
13  
14  
15  
16  
17  
18  
19  
20  
21  
22  
23  
24  
25  
26  
27  
28  
29  
30  
31  
32  
33  
34  
35  
36  
37  
38  
39  
40  
41  
42  
43  
44  
45  
46  
47  
48  
49

|  | First author and year published | Study characteristics |              |                            |                              | Study assessment             |               |                      | Bradford Hill criteria met* |                |
|--|---------------------------------|-----------------------|--------------|----------------------------|------------------------------|------------------------------|---------------|----------------------|-----------------------------|----------------|
|  |                                 | Country               | Study design | Population or participants | Pricing intervention studied | Outcomes studied             | Peer-reviewed | Conflict of interest |                             | Quality rating |
|  |                                 |                       |              |                            |                              | misbehaviour ) and mortality |               |                      |                             |                |

\*Abbreviations used for the Bradford Hill criteria: strength of the association (SA), consistency (CON), specificity (SP), temporality (TE), dose-response (DR), plausibility (PL), coherence (CO), experiment (EX), analogy (AN)

For peer review only



Table 3: Studies published in the grey literature included in Bradford Hill criteria assessment

| Author and year published    | Study characteristics |                                         |                                                                                |                                                                                                                                               |                                                                                                    | Study assessment |                       |                      | Bradford Hill criteria met* |
|------------------------------|-----------------------|-----------------------------------------|--------------------------------------------------------------------------------|-----------------------------------------------------------------------------------------------------------------------------------------------|----------------------------------------------------------------------------------------------------|------------------|-----------------------|----------------------|-----------------------------|
|                              | Country               | Study design                            | Population or participants                                                     | Pricing intervention studied                                                                                                                  | Outcomes studied                                                                                   | Peer-reviewed?   | Conflict of interest? | Quality rating       |                             |
| Angus 2016 (41)              | Scotland              | Modelling study using SAPM              | Scottish general population survey (subgroups of moderate, harmful, hazardous) | MUP of 30p, 40p, 50p, 60p and 70p, compared with taxation interventions                                                                       | Alcohol consumption, consumer spending, exchequer and retail revenue, 47 health harms              | Not stated       | None                  | Strong               | CON, SP, DR, PL, CO         |
| Booth 2008 (42)              | Worldwide             | Review of reviews and systematic review | Studies tended to cover general population                                     | Various minimum unit prices and taxation interventions                                                                                        | Alcohol consumption and various measures of alcohol harm                                           | Yes              | None                  | Strong               | AN                          |
| Brennan 2008 (43)            | England               | Modelling study using SAPM              | Adults in England                                                              | General price increases. MUP of £0.20, £0.25, £0.30, £0.35, £0.40, £0.45, £0.50, £0.60 and £0.70. Restrictions on off-trade price promotions. | Alcohol consumption, consumer spending, sales duty and VAT, 47 health harms, crime, and employment | Not stated       | None                  | Strong               | CON, SP, DR, PL, CO         |
| Hill McManus 2012 (44)       | Canada                | Modelling study using SAPM              | Adults in two Canadian provinces (Ontario and British Columbia)                | MUP of C\$1.50                                                                                                                                | Alcohol consumption, consumer spending, hospital admissions, mortality, crime                      | Not stated       | None                  | Strong               | CON, SP, PL, CO             |
| Institute for Fiscal Studies | Great Britain         | Economic modelling study                | Shopping data from 25,248 British households                                   | MUP of £0.45                                                                                                                                  | Alcohol consumption                                                                                | Not stated       | Not stated            | Not possible to rate | CON, SP, CO                 |

1  
2  
3  
4  
5  
6  
7  
8  
9  
10  
11  
12  
13  
14  
15  
16  
17  
18  
19  
20  
21  
22  
23  
24  
25  
26  
27  
28  
29  
30  
31  
32  
33  
34  
35  
36  
37  
38  
39  
40  
41  
42  
43  
44  
45  
46  
47  
48  
49

| Author and year published              | Study characteristics |                            |                             |                                                                                                                      |                                                                            | Study assessment |                       |                      | Bradford Hill criteria met* |
|----------------------------------------|-----------------------|----------------------------|-----------------------------|----------------------------------------------------------------------------------------------------------------------|----------------------------------------------------------------------------|------------------|-----------------------|----------------------|-----------------------------|
|                                        | Country               | Study design               | Population or participants  | Pricing intervention studied                                                                                         | Outcomes studied                                                           | Peer-reviewed?   | Conflict of interest? | Quality rating       |                             |
| 2010 (45)                              |                       | using market research data |                             |                                                                                                                      |                                                                            |                  |                       |                      |                             |
| Institute for Fiscal Studies 2013 (46) | Great Britain         | Economic analysis          | Population of Great Britain | MUP of £0.45 and increased alcohol taxation                                                                          | Alcohol consumption                                                        | Not stated       | Not stated            | Not possible to rate | CON, SP, CO                 |
| Meng 2010 (47)                         | Scotland              | Modelling study using SAPM | Adults in Scotland          | MUP of £0.20, £0.25, £0.30, £0.35, £0.40, £0.45, £0.50, £0.60 and £0.70. Restrictions on off-trade price promotions. | Alcohol consumption, consumer spending, 47 health harms, crime, employment | Not stated       | None                  | Strong               | CON, SP, DR, PL, CO         |

\*Abbreviations used for the Bradford Hill criteria: strength of the association (SA), consistency (CON), specificity (SP), temporality (TE), dose-response (DR), plausibility (PL), coherence (CO), experiment (EX), analogy (AN)

## Consideration against the Bradford Hill criteria for determining causality

### 1. Strength of the association

In 19/28 studies published in peer-reviewed journals, strength of the association between pricing and alcohol consumption or alcohol related harm was evidenced by a summary statistic such as an odds ratio, and by a test of the statistical significance of the association. As well as the statistical significance of the summary statistic, the magnitude of the effect was also considered, as a larger effect size corresponds to a greater population health impact. Studies in Canada found that 10% increases in minimum prices were associated with reductions in alcohol consumption of 10-16% (3,32), reductions in alcohol attributable hospital admissions of 9% (33), and reductions in alcohol-related mortality of 32%, each of which was statistically significant (38). Cross-sectional studies in the UK, Australia and New Zealand (14,17–20,25,29,30) and one trial from the USA (12) found statistically significant associations between cheaper alcohol and heavier drinking. The magnitude of the association varied across these studies but due to different study measures and outcomes the results are not all comparable. As an indication the odds ratio (OR) for buying cheap alcohol among heavier drinkers was 1.34 in Crawford's study (19) and 1.70 in Callinan's study (17), and in Casswell's study the odds of being a heavier drinker were roughly double among cheap alcohol purchasers (18). Other studies however, had significant results in subgroups only or for particular outcomes (e.g. (16), (31)), and there was not any evidence to support this criterion from the grey literature. Overall there is reasonably good support for the strength of the association criterion.

### 2. Consistency

This criterion requires looking across all the studies included in the review to see whether similar conclusions have been drawn. Inverse associations between alcohol pricing and alcohol consumption or harm have been documented in countries in Europe, North America and Australia, and although most studies are from the last 10 years, there are studies from the 1970s and 1980s as well. There is evidence from different research teams and different types of study including cross-sectional studies, time series analyses and econometric modelling studies. Support for the consistency criterion is very strong.

### 3. Specificity

The specificity criterion relates to whether changes in alcohol consumption or harm could be attributed to anything other than the price intervention. Many studies included have statistically adjusted for confounding factors, however the best support for the specificity criterion comes from the econometric modelling studies because there is no risk of residual confounding. The Sheffield Alcohol Policy Model is one such model and has been applied in England (15,24,26,27,43), Scotland (41,47) and Canada (44) and provides very strong support for the specificity criterion. Further support is provided by other different modelling studies in the UK (45,46) and a trial in the US (12). Thus support for the specificity criteria is very strong.

### 4. Temporality

It is important that price changes or price interventions take place before changes to alcohol consumption and harm in order to attribute causality. Strong support for this criterion comes from research following the introduction of MUP in Canada, where price increases preceded reductions in

1  
2  
3 alcohol consumption (3,32), alcohol attributable hospital admissions (33), and alcohol-related  
4 mortality (38). Studies where price changes preceded the expected changes in alcohol consumption  
5 or harm have also been conducted in Russia (13,35), Poland (36), and Finland (23). Overall there is  
6 very strong support for the temporality criterion.  
7

#### 8 9 5. Dose-response/biological gradient

10  
11 This criterion is supported if different price levels have been found to have differing effects on  
12 consumption or harm. Many of the studies using the Sheffield Alcohol Policy Model explore the  
13 impact of a range of potential MUP options (15,26,27,41,47), and these consistently suggest that the  
14 higher the MUP, the greater the reductions in alcohol consumption or alcohol-related harms. The  
15 Canadian studies of minimum pricing lend further support for this criterion because the analysis  
16 presents the effect on consumption or harm of a modelled 1% increase in price, meaning dose-  
17 response can be inferred (3,32,33,38). Dose response is supported to a lesser extent by evidence  
18 from cross-sectional studies that heavier drinkers pay less for their alcohol (14,17,29,30), that  
19 weekly drinking is more prevalent in adolescents living in countries where alcohol is cheaper (22).  
20 Overall, there is strong support for the dose-response criterion, although the relationship is difficult  
21 to quantify.  
22  
23

#### 24 25 6. Biological plausibility

26  
27 This criterion addresses the effects of alcohol. That there is a relationship between alcohol  
28 consumption and harm is indisputable, although there is some debate about beneficial health  
29 effects of moderate drinking. Alcohol consumption causes many different physical and psychological  
30 conditions and these can be acute or chronic. See (48) for a comprehensive list of acute and chronic  
31 adverse health effects of alcohol. There is evidence from 11/28 research studies and 4/7 studies in  
32 the grey literature that the price of alcohol is inversely related to alcohol-related morbidity, hospital  
33 admissions, or mortality. This provides strong support for the plausibility criterion.  
34  
35

#### 36 37 7. Coherence

38  
39 This criterion refers to whether studies from different disciplines have had complementary findings  
40 and whether these fit or 'hang' well together. It is different to consistency, which is more concerned  
41 with reproducibility of findings. The findings of the majority of studies supported the coherence  
42 criterion in that they suggest that real-world minimum unit pricing (e.g. (3,32,33,38)) or price  
43 increases (e.g. (13,23,36)) led to reductions in alcohol consumption and alcohol-related harm,  
44 modelling studies suggest heavier drinkers will be most affected by MUP (e.g. (24)), and cross  
45 sectional surveys find that it is the heavier drinkers that are drinking the cheapest alcohol (e.g.  
46 (14,30)). There are however a small number of studies which had counter findings; an Australian  
47 study found that high intensity drinking was not affected by higher prices (16) and a worldwide study  
48 of adolescents found no significant effect of price on drunkenness (22). Two studies provided weak  
49 support for MUP in finding that affordability had a greater influence than price (37), and that only a  
50 small number of specific alcohol-related harms were actually affected by price (31). Although the  
51 support for the coherence criterion was not unanimous, overall the evidence base provides strong  
52 support for this criterion.  
53  
54  
55

#### 56 57 8. Experiment

58  
59  
60

1  
2  
3 We have not identified any randomised controlled trials of minimum pricing or price-based  
4 interventions to reduce alcohol consumption. There is a small (and not randomised) trial from the  
5 1970s (12) which found participants living in controlled conditions and offered a daily 'Happy Hour'  
6 discount drank significantly more alcohol than those who were not offered the discount. There is  
7 however substantial evidence in support of the experiment criterion from time series analyses or  
8 natural experiments, for example: where minimum pricing was introduced in Canada (3,32,33,38)  
9 and where prices fluctuated in the late 1980s and early 1990s in Russia (13,35), and to a lesser  
10 extent in Finland, where price increases were associated with reduced mortality only among men  
11 with a basic education (23). These studies provide tentative support for the experiment criterion.  
12  
13

#### 14 15 9. Analogy

16  
17 To address the analogy criterion areas related to alcohol pricing must be considered. There is  
18 evidence from literature on the affordability of alcohol (49) that consumption and harm are very  
19 responsive to the affordability of alcohol. Large systematic reviews have investigated the price  
20 elasticity of demand for alcohol (50), and have found that higher alcohol pricing and taxation  
21 (considered together) are associated with reductions in alcohol consumption, alcohol-related  
22 morbidity and mortality (39,40,42). There are a number of arguments favouring minimum pricing as  
23 an intervention over increased taxation. One of these is that increases in taxation can sometimes be  
24 absorbed by retailers or only 'passed-through' to consumers of more expensive products, keeping  
25 cheap alcohol at a low price (51). Overall the support for the analogy criterion is very strong,  
26 although Bradford Hill describes this as the weakest evidence for causality.  
27  
28  
29

#### 30 **DISCUSSION**

31  
32 We assessed 28 research studies and two systematic reviews, plus a further seven studies from the  
33 grey literature in this review of the evidence for priced based interventions – such as MUP - to  
34 reduce alcohol consumption and alcohol-related harm. All nine of the Bradford Hill criteria for  
35 causality were met. However, the evidence for two of the criteria, although present, was not as  
36 strong as it was for the other criteria. These criteria were strength of the association (criterion 1) and  
37 experiment (criterion 8), and according to Bradford Hill, these are the two criteria that can provide  
38 the strongest evidence for causality. There were also a small minority of studies that found price-  
39 based interventions to be only minimally effective or effective only in population subgroups.  
40 Therefore although all of the criteria were supported, we conclude that it is highly probable, but not  
41 definite, that introducing MUP would reduce alcohol consumption and alcohol-related harms.  
42  
43  
44

45  
46 Strengths of this study are that this is the first to have systematically reviewed the literature relevant  
47 specifically to alcohol minimum pricing policies. We had broad inclusion criteria with regards to  
48 study design, price intervention and outcome measure, allowing for a comprehensive review of the  
49 evidence base. Application of the Bradford Hill criteria as part of a narrative systematic literature  
50 review is a useful and emergent technique for identifying causality: a PubMed search for systematic  
51 reviews with Bradford Hill' mentioned in the title or abstract yielded 28 results, 90% of which were  
52 published in the last five years. The limitations of this systematic review relate mainly to the broad  
53 range of studies included. It was not possible to conduct any kind of meta-analysis and therefore we  
54 do not present a pooled estimate for the likely effect of MUP on certain outcomes. There were also  
55 challenges with the quality appraisal. The EPHPP quality assessment tool was used to assess studies.  
56 However it was not possible to appraise two of the studies from the grey literature using this tool,  
57  
58  
59  
60

1  
2  
3 and there were some challenges assessing the econometric modelling studies against this  
4 framework. However overall we think that our quality appraisal across the different studies is  
5 broadly comparable. It should also be noted that although a number of studies were rated as  
6 'strong', this is in relation to their respective study designs and does not reflect the position of the  
7 study type in the hierarchy of evidence framework.  
8  
9

10 This is the first systematic review that has addressed the effectiveness of price-based interventions  
11 for alcohol such as MUP using the Bradford Hill criteria. Previous systematic reviews of alcohol price  
12 and consumption (39) and alcohol-related harm (40) have tended to consider the effect of price  
13 increases and increased taxation together. These reviews found significant effects on consumption  
14 and morbidity and mortality. Although price regulation and taxation are closely related policy  
15 options, evidence from surveys (51) and modelling studies (41) suggests that the effects of each are  
16 somewhat different, and this is why we chose to study only price in this review. It is important to  
17 highlight that a considerable proportion of included studies were produced by a small number of  
18 research teams. Also, with regards to the econometric modelling studies, uncertainty in estimates or  
19 forecasts is often poorly communicated outside of the academic literature. The overall risk of bias in  
20 the included studies was minimised by excluding studies with a conflict of interest (either for or  
21 against MUP). It was not possible to assess publication bias using an analytical technique such as a  
22 funnel plot due to the narrative nature of the review, however we anticipate that by including grey  
23 literature in this review we have mitigated publication bias as far as reasonably possible.  
24  
25  
26  
27

28 Overall the findings of this review lend strong support for policies such as MUP in reducing alcohol  
29 consumption and alcohol-related harm, with all nine of the Bradford Hill criteria met and little by  
30 way of counter findings. As it is unlikely to be feasible to conduct randomised controlled trials (RCTs)  
31 of MUP, the decision whether or not to introduce MUP will not be based on a systematic review and  
32 meta-analysis of RCTs, and therefore this synthesis of the evidence base according to the Bradford  
33 Hill criteria is of value.  
34  
35

36 Unanswered questions about the effectiveness of MUP remain, and in Scotland in particular, there  
37 are opportunities to address these. The decision on whether to introduce MUP in Scotland currently  
38 lies with the Scottish Courts of Session in Edinburgh (NB to be updated as situation progresses  
39 throughout the summer). If Scotland rules to implement MUP, then it would be possible to evaluate  
40 the validity of the Sheffield Alcohol Policy Model studies conducted using Scottish data. It would also  
41 be possible to conduct a longitudinal study to evaluate the effectiveness of MUP in reducing alcohol  
42 consumption and alcohol-related morbidity and mortality. The findings of this natural experiment  
43 would have relevance elsewhere within and outside the UK.  
44  
45  
46

#### 47 **ACKNOWLEDGEMENTS**

48  
49 We would like to thank Rebecca McDonald for advice on using the Bradford Hill criteria in a  
50 systematic review, Dr James Nicholls for advice on study interpretation, and Dr Daniel Stahl for  
51 statistical advice on some of the included studies.  
52

#### 53 **CONTRIBUTIONS**

54  
55 SM conceived the idea. SB conducted the initial search. SM and SM contributed to independently  
56 reviewing abstracts, hand-searching reference lists, completing data extraction, and conducting  
57  
58  
59  
60

1  
2  
3 quality appraisal. All authors contributed to the analysis and interpretation of the results and  
4 contributed to writing the manuscript. SB is guarantor.  
5

#### 6 **FUNDING**

7  
8 This research received no specific grant from any funding agency in the public, commercial or not-  
9 for-profit sectors.  
10

#### 11 **COMPETING INTERESTS**

12  
13 All authors have completed the ICMJE uniform disclosure form at [www.icmje.org/coi\\_disclosure.pdf](http://www.icmje.org/coi_disclosure.pdf)  
14 and declare: no support from any organisation for the submitted work; no financial relationships  
15 with any organisations that might have an interest in the submitted work in the previous three  
16 years; no other relationships or activities that could appear to have influenced the submitted work.  
17  
18

19  
20 Two of the authors work at King's College London, which as an institution is listed as a member of  
21 the Alcohol Health Alliance. SM has received funding indirectly from UKCTAS, which as an institution  
22 is also listed as a member of the Alcohol Health Alliance. However none of the authors have any  
23 relationship with the Alcohol Health Alliance.  
24

#### 25 **DATA SHARING**

26  
27 There is no dataset or any unpublished data relating to this systematic review.  
28  
29  
30  
31  
32  
33  
34  
35  
36  
37  
38  
39  
40  
41  
42  
43  
44  
45  
46  
47  
48  
49  
50  
51  
52  
53  
54  
55  
56  
57  
58  
59  
60



## REFERENCES

1. Lifestyles Statistics Team,, Health and Social Care Information Centre. Statistics on Alcohol. England, 2015 [Internet]. 2015 [cited 2016 Jun 3]. Available from: <http://www.hscic.gov.uk/catalogue/PUB17712/alc-eng-2015-rep.pdf>
2. Anderson P, Chisholm D, Fuhr DC. Effectiveness and cost-effectiveness of policies and programmes to reduce the harm caused by alcohol. *Lancet Lond Engl*. 2009 Jun 27;373(9682):2234–46.
3. Stockwell T, Auld MC, Zhao J, Martin G. Does minimum pricing reduce alcohol consumption? The experience of a Canadian province. *Addiction*. 2012 May 1;107(5):912–20.
4. World Health Organization. European status report on alcohol and health 2014. Pricing policies [Internet]. World Health Organization; 2014. Available from: [http://www.euro.who.int/\\_\\_data/assets/pdf\\_file/0003/244902/Pricing-policies.pdf](http://www.euro.who.int/__data/assets/pdf_file/0003/244902/Pricing-policies.pdf)
5. HM Government. The Government’s Alcohol Strategy [Internet]. 2012 [cited 2016 Jun 3]. Available from: [https://www.gov.uk/government/uploads/system/uploads/attachment\\_data/file/224075/alcohol-strategy.pdf](https://www.gov.uk/government/uploads/system/uploads/attachment_data/file/224075/alcohol-strategy.pdf)
6. Home Office. Guidance on banning the sale of alcohol below the cost of duty plus VAT. For suppliers of alcohol and enforcement authorities in England and Wales [Internet]. 2015 [cited 2016 Jun 3]. Available from: [https://www.gov.uk/government/uploads/system/uploads/attachment\\_data/file/415522/HO\\_Guidance\\_on\\_BBCS.pdf](https://www.gov.uk/government/uploads/system/uploads/attachment_data/file/415522/HO_Guidance_on_BBCS.pdf)
7. Off Licence News. First conviction for selling alcohol “below cost” sees retailer fined [Internet]. 2016 [cited 2016 Jun 3]. Available from: [http://www.offlicencenews.co.uk/news/fullstory.php/aid/15750/First\\_conviction\\_for\\_selling\\_alcohol\\_\\_below\\_cost\\_\\_sees\\_retailer\\_fined.html](http://www.offlicencenews.co.uk/news/fullstory.php/aid/15750/First_conviction_for_selling_alcohol__below_cost__sees_retailer_fined.html)
8. Home Office. Duty plus VAT permitted price calculator (2015) [Internet]. 2016. Available from: <https://www.gov.uk/government/publications/banning-the-sale-of-alcohol-below-the-cost-of-duty-plus-vat-march-2015>
9. Fitzgerald N, Angus C. Four Nations: How Evidence-based are Alcohol Policies and Programmes across the UK?. London: [Internet]. London: Alliance for Useful Evidence/Alcohol Health Alliance.; 2015. Available from: <http://www.alliance4usefulevidence.org/assets/Four-Nations-v3.pdf>
10. Cochrane Handbook. 21.4 Assessment of study quality and risk of bias [Internet]. [cited 2016 Jun 2]. Available from: [http://handbook.cochrane.org/chapter\\_21/21\\_4\\_assessment\\_of\\_study\\_quality\\_and\\_risk\\_of\\_bias.htm](http://handbook.cochrane.org/chapter_21/21_4_assessment_of_study_quality_and_risk_of_bias.htm)
11. Hill AB. The Environment and Disease: Association or Causation? *Proc R Soc Med*. 1965 May;58(5):295–300.
12. Babor TF, Mendelson JH, Greenberg I, Kuehnle J. Experimental analysis of the ‘happy hour’: effects of purchase price on alcohol consumption. *Psychopharmacology (Berl)*. 1978 Jun 15;58(1):35–41.



13. Bhattacharya J, Gathmann C, Miller G. The Gorbachev Anti-Alcohol Campaign and Russia's Mortality Crisis. *Am Econ J Appl Econ*. 2013;5(2):232–60.
14. Black H, Gill J, Chick J. The price of a drink: levels of consumption and price paid per unit of alcohol by Edinburgh's ill drinkers with a comparison to wider alcohol sales in Scotland. *Addiction*. 2011 Apr 1;106(4):729–36.
15. Brennan A, Meng Y, Holmes J, Hill-McManus D, Meier PS. Potential benefits of minimum unit pricing for alcohol versus a ban on below cost selling in England 2014: modelling study. *The BMJ*. 2014 Sep 30;349:g5452.
16. Byrnes J, Shakeshaft A, Petrie D, Doran C. Can harms associated with high-intensity drinking be reduced by increasing the price of alcohol? *Drug Alcohol Rev*. 2013 Jan;32(1):27–30.
17. Callinan S, Room R, Livingston M, Jiang H. Who Purchases Low-Cost Alcohol in Australia? *Alcohol Alcohol*. 2015 Jun 24;agv066.
18. Casswell S, Huckle T, Wall M, Yeh LC. International alcohol control study: pricing data and hours of purchase predict heavier drinking. *Alcohol Clin Exp Res*. 2014 May;38(5):1425–31.
19. Crawford MJ, Parry AMH, Weston ARW, Seretis D, Zauter-Tutt M, Hussain A, et al. Relationship between price paid for off-trade alcohol, alcohol consumption and income in England: a cross-sectional survey. *Alcohol Alcohol Oxf Oxf*. 2012 Dec;47(6):738–42.
20. Falkner C, Christie G. The effect of alcohol price on dependent drinkers' alcohol consumption. *N Z Med J*. 2015;128(1427).
21. Forsyth AJM, Ellaway A, Davidson N. How Might the Alcohol Minimum Unit Pricing (MUP) Impact upon Local Off-Sales Shops and the Communities Which They Serve? *Alcohol Alcohol*. 2014 Jan 1;49(1):96–102.
22. Gilligan C, Kuntsche E, Gmel G. Adolescent drinking patterns across countries: associations with alcohol policies. *Alcohol Alcohol Oxf Oxf*. 2012 Dec;47(6):732–7.
23. Herttua K, Mäkelä P, Martikainen P. Minimum Prices for Alcohol and Educational Disparities in Alcohol-related Mortality. *Epidemiology*. 2015 May;26(3):337–43.
24. Holmes J, Meng Y, Meier PS, Brennan A, Angus C, Campbell-Burton A, et al. Effects of minimum unit pricing for alcohol on different income and socioeconomic groups: a modelling study. *The Lancet*. 2014 May 16;383(9929):1655–64.
25. Ludbrook PA, Petrie D, McKenzie L, Farrar S. Tackling alcohol misuse: Purchasing patterns affected by minimum pricing for alcohol. *Appl Health Econ Health Policy*. 2012 Aug 6;10(1):51–63.
26. Meier PS, Purshouse R, Brennan A. Policy options for alcohol price regulation: the importance of modelling population heterogeneity. *Addiction*. 2010 Mar 1;105(3):383–93.
27. Purshouse RC, Meier PS, Brennan A, Taylor KB, Rafia R. Estimated effect of alcohol pricing policies on health and health economic outcomes in England: an epidemiological model. *The Lancet*. 2010 Apr;375(9723):1355–64.

- 1  
2  
3 28. Seaman P, Edgar F, Ikegwuonu T. The role of alcohol price in young adult drinking cultures in  
4 Scotland. *Drugs Educ Prev Policy*. 2013 Aug 1;20(4):278–85.  
5  
6 29. Sharma A, Vandenberg B, Hollingsworth B. Minimum Pricing of Alcohol versus Volumetric  
7 Taxation: Which Policy Will Reduce Heavy Consumption without Adversely Affecting Light and  
8 Moderate Consumers? *PLoS ONE*. 2014 Jan 22;9(1):e80936.  
9  
10 30. Sheron N, Chilcott F, Matthews L, Challoner B, Thomas M. Impact of minimum price per unit of  
11 alcohol on patients with liver disease in the UK. *Clin Med*. 2014 Aug 1;14(4):396–403.  
12  
13 31. Sloan FA, Reilly BA, Schenzler C. Effects of prices, civil and criminal sanctions, and law  
14 enforcement on alcohol-related mortality. *J Stud Alcohol*. 1994 Jul;55(4):454–65.  
15  
16 32. Stockwell T, Zhao J, Giesbrecht N, Macdonald S, Thomas G, Wettlaufer A. The Raising of  
17 Minimum Alcohol Prices in Saskatchewan, Canada: Impacts on Consumption and Implications  
18 for Public Health. *Am J Public Health*. 2012 Oct 18;102(12):e103–10.  
19  
20 33. Stockwell T, Zhao J, Martin G, Macdonald S, Vallance K, Treno A, et al. Minimum Alcohol Prices  
21 and Outlet Densities in British Columbia, Canada: Estimated Impacts on Alcohol-Attributable  
22 Hospital Admissions. *Am J Public Health*. 2013 Apr 18;103(11):2014–20.  
23  
24 34. Sutton M, Godfrey C. A grouped data regression approach to estimating economic and social  
25 influences on individual drinking behaviour. *Health Econ*. 1995 May 1;4(3):237–47.  
26  
27 35. Treisman D. Death and prices. *Econ Transit*. 2010 Apr 1;18(2):281–331.  
28  
29 36. Wald I, Moskalewicz J. Alcohol policy in a crisis situation. *Br J Addict*. 1984 Sep;79(3):331–5.  
30  
31 37. Wall M, Casswell S. Affordability of alcohol as a key driver of alcohol demand in New Zealand: a  
32 co-integration analysis. *Addict Abingdon Engl*. 2013 Jan;108(1):72–9.  
33  
34 38. Zhao J, Stockwell T, Martin G, Macdonald S, Vallance K, Treno A, et al. The relationship between  
35 minimum alcohol prices, outlet densities and alcohol-attributable deaths in British Columbia,  
36 2002–09. *Addiction*. 2013 Jun 1;108(6):1059–69.  
37  
38 39. Wagenaar AC, Salois MJ, Komro KA. Effects of beverage alcohol price and tax levels on drinking:  
39 a meta-analysis of 1003 estimates from 112 studies. *Addict Abingdon Engl*. 2009  
40 Feb;104(2):179–90.  
41  
42 40. Wagenaar AC, Tobler AL, Komro KA. Effects of alcohol tax and price policies on morbidity and  
43 mortality: a systematic review. *Am J Public Health*. 2010 Nov;100(11):2270–8.  
44  
45 41. Angus C, Holmes J, Pryce R, Meier P, Brennan A. Model-based appraisal of the comparative  
46 impact of Minimum Unit Pricing and taxation policies in Scotland An adaptation of the Sheffield  
47 Alcohol Policy Model version 3 [Internet]. ScHARR, University of Sheffield; 2016 Apr [cited 2016  
48 Apr 7]. Available from:  
49 [https://www.shef.ac.uk/polopoly\\_fs/1.565373!/file/Scotland\\_report\\_2016.pdf](https://www.shef.ac.uk/polopoly_fs/1.565373!/file/Scotland_report_2016.pdf)  
50  
51 42. Booth A, Brennan A, Meier PS, O'Reilly D, Purshouse R, Stockwell T, et al. Independent review of  
52 the effects of alcohol pricing and promotion: part A – systematic reviews. Project Report for the  
53 Department of Health September 2008. ScHARR University of Sheffield; 2008.  
54  
55  
56  
57  
58  
59  
60

- 1  
2  
3  
4  
5  
6  
7  
8  
9  
10  
11  
12  
13  
14  
15  
16  
17  
18  
19  
20  
21  
22  
23  
24  
25  
26  
27  
28  
29  
30  
31  
32  
33  
34  
35  
36  
37  
38  
39  
40  
41  
42  
43  
44  
45  
46  
47  
48  
49  
50  
51  
52  
53  
54  
55  
56  
57  
58  
59  
60
43. Brennan A, Purshouse R, Taylor K, Rafia R. Independent review of the effects of alcohol pricing and promotion: part B. Modelling the Potential Impact of Pricing and Promotion Policies for Alcohol in England: Results from the Sheffield Alcohol Policy Model Version 2008(1-1) [Internet]. ScHARR University of Sheffield; 2008. Available from: [https://www.shef.ac.uk/polopoly\\_fs/1.95621!/file/PartB.pdf](https://www.shef.ac.uk/polopoly_fs/1.95621!/file/PartB.pdf)
  44. Hill McManus D, Brennan A, Stockwell T, Giesbrecht N, Thomas G, Zhao J, et al. Model-based appraisal of alcohol minimum pricing in Ontario and British Columbia: A Canadian adaptation of the Sheffield Alcohol Policy Model Version 2 [Internet]. 2012. Available from: <http://www.uvic.ca/research/centres/carbc/assets/docs/report-model-based-appraisal.pdf>
  45. Institute for Fiscal Studies. The Impact of Introducing a Minimum Price on Alcohol in Britain. IFS Briefing Note BN109. 2010.
  46. Institute for Fiscal Studies. Price-based measures to reduce alcohol consumption. IFS Briefing Note BN138. 2013.
  47. Meng Y, Purshouse R, Brennan A, Meier PS. Model-based appraisal of alcohol minimum pricing and off-licensed trade discount bans in Scotland using the Sheffield Alcohol Policy Model (v.2): Second update based on newly available data [Internet]. 2010. Available from: [http://www.shef.ac.uk/polopoly\\_fs/1.96510!/file/scotlandupdate.pdf](http://www.shef.ac.uk/polopoly_fs/1.96510!/file/scotlandupdate.pdf)
  48. Department of Health. Table 1.1 Acute adverse effects associated with the use of alcohol and Table 1.2 Chronic adverse effects associated with the use of alcohol. In A summary of the health harms of drugs [Internet]. Leeds: Department of Health; 2011 [cited 2016 May 24]. Available from: <http://www.nta.nhs.uk/uploads/healthharmsfinal-v1.pdf>
  49. Rabinovich L, Brutscher P-B, de Vries H, Tiessen J, Clift J, Reding A. The affordability of alcoholic beverages in the European Union. 2012;
  50. Gallet CA. The Demand for Alcohol: A Meta-Analysis of Elasticities [Internet]. Rochester, NY: Social Science Research Network; 2007 May [cited 2016 Jan 6]. Report No.: ID 985689. Available from: <http://papers.ssrn.com/abstract=985689>
  51. Ally AK, Meng Y, Chakraborty R, Dobson PW, Seaton JS, Holmes J, et al. Alcohol tax pass-through across the product and price range: do retailers treat cheap alcohol differently? *Addiction*. 2014 Dec 1;109(12):1994–2002.

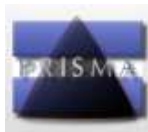

## PRISMA 2009 Flow Diagram

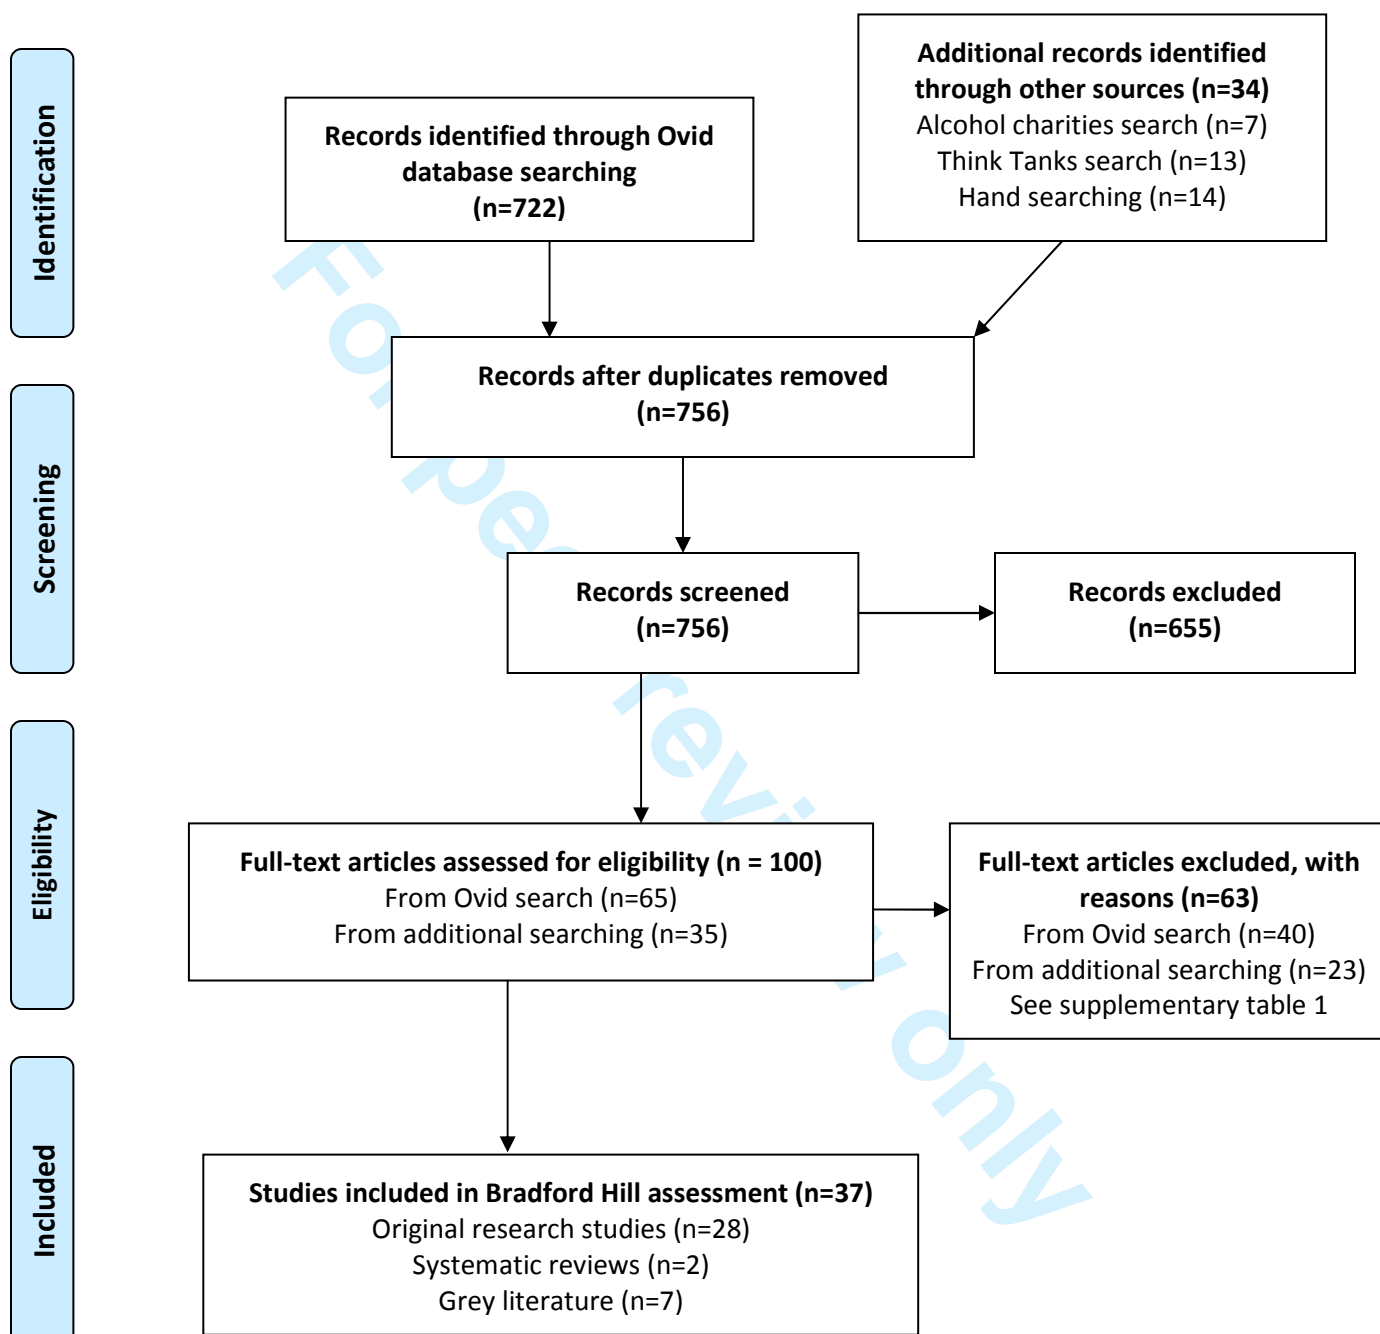

From: Moher D, Liberati A, Tetzlaff J, Altman DG, The PRISMA Group (2009). Preferred Reporting Items for Systematic Reviews and Meta-Analyses: The PRISMA Statement. PLoS Med 6(6): e1000097. doi:10.1371/journal.pmed1000097

For more information, visit [www.prisma-statement.org](http://www.prisma-statement.org).

For peer review only - <http://bmjopen.bmj.com/site/about/guidelines.xhtml>

**Online supplementary table: identified studies where full text assessed, then not included in review**

| Source      | Author and year published | Study type                                                                              | Reason excluded                                                                                        |
|-------------|---------------------------|-----------------------------------------------------------------------------------------|--------------------------------------------------------------------------------------------------------|
| Ovid search | Aage 2012 (1)             | Time series analysis                                                                    | Affordability, not price                                                                               |
|             | Ayyagari 2013 (2)         | Econometric analysis of price and consumption data                                      | Price elasticities of demand only                                                                      |
|             | Bellis 2009 (3)           | Cross-sectional surveys                                                                 | Association between drink type and price, and drink type and harms, but not directly reported in paper |
|             | Bennetts 2008 (4)         | Review (not systematic)                                                                 | Review of a report (not a research study)                                                              |
|             | Callinan 2015 (5)         | Editorial (not a research study)                                                        | Editorial about different pricing, taxation and affordability measures, not a research study           |
|             | Chalmers 2013 (6)         | Commentary (not a research study)                                                       | Is a commentary about challenges to MUP e.g. industry and the law                                      |
|             | Chaloupka 2002 (7)        | Review (not systematic)                                                                 | Review of previous economic studies (not systematic)                                                   |
|             | Chick 2012 (8)            | Editorial (not a research study)                                                        | Is about bans on multi-buys, not minimum price                                                         |
|             | Cook 2014 (9)             | Analysis of cross-sectional survey data and alcohol policies                            | Affordability not price (GDP PPP)                                                                      |
|             | Duffy 1981 (10)           | Econometric time series analysis                                                        | Talks about elasticities in relation to duty rises not MUP. NB is M duffy, not J duffy                 |
|             | Giesbrecht 2003 (11)      | Review (not systematic)                                                                 | Review of previous studies (not systematic)                                                            |
|             | Giesbrecht 2015 (12)      | Policy analysis                                                                         | Does not relate price intervention to consumption or harm                                              |
|             | Grossman 2004 (13)        | Economic analysis                                                                       | Tax (federal excise tax increase) not MUP                                                              |
|             | Hadland 2015 (14)         | Policy analysis                                                                         | Effects of numerous alcohol policies considered together                                               |
|             | Heeb 2003 (15)            | Natural experiment: longitudinal survey 3 months before and 3 months after price change | Tax, not price intervention                                                                            |
|             | Hogan 2006 (16)           | Natural experiment/evaluation                                                           | Tax, not price intervention                                                                            |

Online supplementary file to Boniface S, Scannell JW, Marlow S: *Evidence for the effectiveness of minimum pricing of alcohol: a systematic review and assessment using the Bradford Hill criteria for causality*

1

|                                  |                                                              |                                                                                                              |
|----------------------------------|--------------------------------------------------------------|--------------------------------------------------------------------------------------------------------------|
| Jónsson 2013 (17)                | Cross-sectional surveys and routine data                     | Policies included tax and other supply side policies, but not MUP                                            |
| Katikireddi 2012 (18)            | Commentary (not a research study)                            | Is a commentary about legal considerations of MUP, not effectiveness                                         |
| Katikireddi 2014 (19)            | Qualitative study                                            | Stakeholder views of MUP, not effectiveness                                                                  |
| Khaltourina 2015 (20)            | Cross-sectional surveys and routine data                     | Tax, not price intervention                                                                                  |
| Knibbe 2014 (21)                 | Analysis of cross-sectional survey data and alcohol policies | No price intervention studied, price investigated more as a covariate                                        |
| Lindeman 2013 (22)               | Cross-sectional surveys and routine data                     | Tax, not price intervention                                                                                  |
| Lonsdale 2012 (23)               | Qualitative study                                            | Public opinion of policy, nothing about effectiveness                                                        |
| Mäkelä 2009 (24)                 | Review (not systematic) and analysis of routine data         | Tax, not price intervention                                                                                  |
| McCambridge 2014 (25)            | Document analysis and qualitative interviews                 | Corporate lobbying, not the effectiveness of MUP                                                             |
| Meng 2014 (26)                   | Econometric analysis using pseudo panel                      | Price elasticities of demand only                                                                            |
| Nelson 2013 (27)                 | Review (not systematic)                                      | Conflict of interest (funded by International Center for Alcohol Policies).                                  |
| Nelson 2014 (affordability) (28) | Analysis of routine data and economic modelling              | Affordability not price, and conflict of interest (funded by International Center for Alcohol Policies).     |
| Nelson 2014 (elasticities) (29)  | Economic modelling                                           | Conflict of interest (funded by International Center for Alcohol Policies).                                  |
| Nelson 2014 (gender) (30)        | Systematic review                                            | Conflict of interest (funded by International Center for Alcohol Policies).                                  |
| Nicholls & Greenaway 2015 (31)   | Policy analysis                                              | Is about policy framing, not the effectiveness of MUP                                                        |
| Record 2009 (32)                 | Modelling study                                              | Conflict of interest – both authors were members of the Alcohol Health Alliance which is campaigning for MUP |
| Rush 1986 (33)                   | Analysis of routine data                                     | Affordability, not price                                                                                     |
| Shi 2011 (34)                    | Econometric analysis of price and                            | Price elasticities of demand only                                                                            |

Online supplementary file to Boniface S, Scannell JW, Marlow S: *Evidence for the effectiveness of minimum pricing of alcohol: a systematic review and assessment using the Bradford Hill criteria for causality*

2

|                                  |                                                      |                                                              |                                                                                                               |
|----------------------------------|------------------------------------------------------|--------------------------------------------------------------|---------------------------------------------------------------------------------------------------------------|
|                                  |                                                      | consumption data                                             |                                                                                                               |
|                                  | Skov 2011 (35)                                       | Natural experiment                                           | Tax, not price intervention                                                                                   |
|                                  | Stockwell 2012 (36)                                  | Letter to journal (not a research study)                     | Letter concerning homelessness and price paid for alcohol                                                     |
|                                  | Stockwell 2013 (37)                                  | Letter to journal (not a research study)                     | Letter to editor about UK industry criticism of Canadian research on MUP, not a research study                |
|                                  | Tian 2011 (38)                                       | Econometric analysis of price and consumption data           | Price elasticities of demand only                                                                             |
|                                  | Xuan 2015 (39)                                       | Analysis of cross-sectional survey data and alcohol policies | Price and tax considered together                                                                             |
|                                  | Yashkin 2013 (40)                                    | Econometric analysis of price and consumption data           | Price elasticities of demand only                                                                             |
| Hand searching & grey literature | Ally 2014 (41)                                       | Analysis of VAT and price data                               | Tax, not price intervention                                                                                   |
|                                  | Anderson 2009 (42)                                   | Lancet 'Series' article – a commentary/review                | Not an original research study.                                                                               |
|                                  | Centre for Economics and Business Research 2010 (43) | Report (not a research study)                                | Conflict of interest (funded by SAB Miller). Is a critique of Sheffield modelling, not a research study.      |
|                                  | Craven 2013 (44)                                     | Economic report                                              | Published in the journal of the Institute of Economic Affairs, which has a conflict of interest.              |
|                                  | Duffy & Snowdon 2012 (45)                            | Report chapters (not a research study)                       | Is a critique of Sheffield modelling, not a research study.                                                   |
|                                  | Fitzgerald & Angus 2015 (46)                         | Report (not a research study)                                | Is a report about use of evidence in policymaking, not about effectiveness of MUP. Also not a research study. |
|                                  | Gallet 2007 (47)                                     | Meta-analysis                                                | Is looking at elasticities of demand for alcohol, not the effectiveness of MUP.                               |
|                                  | Gray 2000 (48)                                       | Natural experiment                                           | Restrictions do not include any price interventions                                                           |
|                                  | Gruenewald 2006 (49)                                 | Time series analysis/modelling                               | Tax, not price intervention                                                                                   |
|                                  | Hilton 2014 (50)                                     | Content analysis of UK newsprint                             | Media representations of MUP, not effectiveness                                                               |



|    |                                                    |                                                   |                                                                                                                            |
|----|----------------------------------------------------|---------------------------------------------------|----------------------------------------------------------------------------------------------------------------------------|
| 1  |                                                    |                                                   |                                                                                                                            |
| 2  |                                                    |                                                   |                                                                                                                            |
| 3  |                                                    |                                                   |                                                                                                                            |
| 4  |                                                    |                                                   |                                                                                                                            |
| 5  |                                                    |                                                   |                                                                                                                            |
| 6  | Home Office 2011 (51)                              | 'Summary review'/report (not a research study)    | Replicates what we have elsewhere, but in less detail. Also not a research study.                                          |
| 7  |                                                    |                                                   |                                                                                                                            |
| 8  | Institute for Fiscal Studies 2011 (52)             | Report (not a research study)                     | Is not about effectiveness of MUP                                                                                          |
| 9  |                                                    |                                                   |                                                                                                                            |
| 10 | Institute for Fiscal Studies 2013 (53)             | Report (not a research study)                     | Is not looking at effectiveness of MUP, is comparing Govt and industry revenue under MUP and higher tax                    |
| 11 |                                                    |                                                   |                                                                                                                            |
| 12 | Institute of Alcohol Studies (Goodliffe) 2014 (54) | Webpage                                           | Is discussing legal issues, not effectiveness of MUP                                                                       |
| 13 |                                                    |                                                   |                                                                                                                            |
| 14 |                                                    |                                                   |                                                                                                                            |
| 15 | Kisely & Lawence 2015 (55)                         | Natural experiment                                | Tax, not price intervention                                                                                                |
| 16 | Ludbrook 2010 (56)                                 | Secondary analysis of Expenditure and Food Survey | Describes purchasing patterns of low price alcohol in Scotland. Not about MUP.                                             |
| 17 |                                                    |                                                   |                                                                                                                            |
| 18 | Ornstein 1983 (57)                                 | Literature review book chapter (not systematic)   | Price elasticities of demand only                                                                                          |
| 19 |                                                    |                                                   |                                                                                                                            |
| 20 | Rabinovch 2012 (58)                                | Technical report (contains data)                  | Does not assess effectiveness of MUP                                                                                       |
| 21 |                                                    |                                                   |                                                                                                                            |
| 22 | Radaev 2015 (59)                                   | Time series analysis                              | Paper explored the effect of price interventions on consumption of homemade alcohol, not the effectiveness of MUP          |
| 23 |                                                    |                                                   |                                                                                                                            |
| 24 |                                                    |                                                   |                                                                                                                            |
| 25 |                                                    |                                                   |                                                                                                                            |
| 26 | Robinson 2013 (60)                                 | Letter to journal (not a research study)          | Letter to editor about evidence for MUP, not a research study                                                              |
| 27 |                                                    |                                                   |                                                                                                                            |
| 28 | Snowdon 2015 (61)                                  | Book chapter                                      | Is a critique of Sheffield modelling, not a research study. Institute of Economic Affairs also has a conflict of interest. |
| 29 |                                                    |                                                   |                                                                                                                            |
| 30 |                                                    |                                                   |                                                                                                                            |
| 31 |                                                    |                                                   |                                                                                                                            |
| 32 | Wine and Spirits Trade Association n.d. (62)       | Press release                                     | Press release critiquing Zhao 2013 paper, not a research study                                                             |
| 33 |                                                    |                                                   |                                                                                                                            |
| 34 | World Health Organisation 2014 (63)                | Report                                            | Does not discuss effectiveness of MUP                                                                                      |
| 35 |                                                    |                                                   |                                                                                                                            |
| 36 |                                                    |                                                   |                                                                                                                            |
| 37 |                                                    |                                                   |                                                                                                                            |
| 38 |                                                    |                                                   |                                                                                                                            |
| 39 |                                                    |                                                   |                                                                                                                            |
| 40 |                                                    |                                                   |                                                                                                                            |
| 41 |                                                    |                                                   |                                                                                                                            |
| 42 |                                                    |                                                   |                                                                                                                            |
| 43 |                                                    |                                                   |                                                                                                                            |
| 44 |                                                    |                                                   |                                                                                                                            |
| 45 |                                                    |                                                   |                                                                                                                            |
| 46 |                                                    |                                                   |                                                                                                                            |
| 47 |                                                    |                                                   |                                                                                                                            |
| 48 |                                                    |                                                   |                                                                                                                            |
| 49 |                                                    |                                                   |                                                                                                                            |



## References

1. Aage H. Alcohol in Greenland 1951–2010: consumption, mortality, prices. *Int J Circumpolar Health* [Internet]. 2012 Dec 17 [cited 2016 Feb 27];71. Available from: <http://www.ncbi.nlm.nih.gov/pmc/articles/PMC3525923/>
2. Ayyagari P, Deb P, Fletcher J, Gallo W, Sindelar JL. Understanding heterogeneity in price elasticities in the demand for alcohol for older individuals. *Health Econ*. 2013 Jan;22(1):89–105.
3. Bellis MA, Phillips-Howard PA, Hughes K, Hughes S, Cook PA, Morleo M, et al. Teenage drinking, alcohol availability and pricing: a cross-sectional study of risk and protective factors for alcohol-related harms in school children. *BMC Public Health*. 2009 Oct 9;9(1):1–12.
4. Bennetts R, Russell Bennetts. Alcohol: Price, Policy and Public Health. *Alcohol Alcohol*. 2008 Mar 1;43(2):123–123.
5. Callinan S, Room R, Dietze P. Alcohol Price Policies as an Instrument of Health Equity: Differential Effects of Tax and Minimum Price Measures. *Alcohol Alcohol Oxf Oxf*. 2015 Nov;50(6):629–30.
6. Chalmers J, Carragher N, Davoren S, O'Brien P. Real or perceived impediments to minimum pricing of alcohol in Australia: Public opinion, the industry and the law. *Int J Drug Policy*. 2013 Nov;24(6):517–23.
7. Chaloupka FJ, Grossman M, Saffer H. The effects of price on alcohol consumption and alcohol-related problems. *Alcohol Res Health J Natl Inst Alcohol Abuse Alcohol*. 2002;26(1):22–34.
8. Chick J. 16 for the Price of 10: Effects of a Ban on Multi-Buy Alcohol. *Alcohol Alcohol*. 2012 Feb 22;47(2):83–83.
9. Cook WK, Bond J, Greenfield TK. Are alcohol policies associated with alcohol consumption in low- and middle-income countries? *Addict Abingdon Engl*. 2014 Jul;109(7):1081–90.
10. Duffy M. The influence of prices, consumer incomes and advertising upon the demand for alcoholic drink in the United Kingdom: an econometric study. *Alcohol Alcohol*. 1981 Sep 21;16(4):200–9.
11. Giesbrecht N, Greenfield TK. Preventing Alcohol-Related Problems in the US Through Policy: Media Campaigns, Regulatory Approaches and Environmental Interventions. *J Prim Prev*. 2003 Sep;24(1):63–104.
12. Giesbrecht N, Wettlaufer A, Thomas G, Stockwell T, Thompson K, April N, et al. Pricing of alcohol in Canada: A comparison of provincial policies and harm-reduction opportunities. *Drug Alcohol Rev*. 2015 Nov 4;
13. Grossman M. Individual Behaviors and Substance Use: The Role of Price [Internet]. National Bureau of Economic Research; 2004 Dec [cited 2016 Feb 27]. Report No.: 10948. Available from: <http://www.nber.org/papers/w10948>

Online supplementary file to Boniface S, Scannell JW, Marlow S: *Evidence for the effectiveness of minimum pricing of alcohol: a systematic review and assessment using the Bradford Hill criteria for causality* 5

- 1  
2  
3 14. Hadland SE, Xuan Z, Blanchette JG, Heeren TC, Swahn MH, Naimi TS. Alcohol Policies and  
4 Alcoholic Cirrhosis Mortality in the United States. *Prev Chronic Dis* [Internet]. 2015 Oct 15 [cited  
5 2016 Feb 27];12. Available from: [http://www.cdc.gov/pcd/issues/2015/15\\_0200.htm](http://www.cdc.gov/pcd/issues/2015/15_0200.htm)  
6
- 7 15. Heeb J-L, Gmel G, Zurbrügg C, Kuo M, Rehm J. Changes in alcohol consumption following a  
8 reduction in the price of spirits: a natural experiment in Switzerland. *Addict Abingdon Engl*. 2003  
9 Oct;98(10):1433–46.  
10
- 11 16. Hogan E, BOFFA J, ROSEWARNE C, BELL S, CHEE DA. What price do we pay to prevent  
12 alcohol-related harms in Aboriginal communities? The Alice Springs trial of liquor licensing  
13 restrictions. *Drug Alcohol Rev*. 2006;25(3):207–12.  
14
- 15 17. Jónsson RM, Kristjánsson S. Alcohol policy and public opinion in Iceland, 1989–2012. *Nord*  
16 *Stud Alcohol Drugs*. 2013;30(6):539–49.  
17
- 18 18. Katikireddi SV, McLean JA. Introducing a minimum unit price for alcohol in Scotland:  
19 considerations under European Law and the implications for European public health. *Eur J Public*  
20 *Health*. 2012 Aug 1;22(4):457–8.  
21
- 22 19. Katikireddi SV, Bond L, Hilton S. Perspectives on econometric modelling to inform policy: a  
23 UK qualitative case study of minimum unit pricing of alcohol. *Eur J Public Health*. 2014 Jun  
24 1;24(3):490–5.  
25
- 26 20. Khaltourina D, Korotayev A. Effects of Specific Alcohol Control Policy Measures on Alcohol-  
27 Related Mortality in Russia from 1998 to 2013. *Alcohol Alcohol*. 2015 Sep 1;50(5):588–601.  
28
- 29 21. Knibbe RA, Derickx M, Allamani A, Massini G. Alcohol Consumption and its Related Harms in  
30 the Netherlands Since 1960: Relationships With Planned and Unplanned Factors. *Subst Use Misuse*.  
31 2014 Oct 15;49(12):1589–600.  
32
- 33 22. Lindeman M, Karlsson T, Österberg E. Public opinions, alcohol consumption and policy  
34 changes in Finland, 1993–2013. *Nord Stud Alcohol Drugs*. 2013;30(6):507–24.  
35
- 36 23. Lonsdale AJ, Hardcastle SJ, Hagger MS. A minimum price per unit of alcohol: A focus group  
37 study to investigate public opinion concerning UK government proposals to introduce new price  
38 controls to curb alcohol consumption. *BMC Public Health*. 2012 Nov 23;12(1):1023.  
39
- 40 24. Mäkelä P, Osterberg E. Weakening of one more alcohol control pillar: a review of the effects  
41 of the alcohol tax cuts in Finland in 2004. *Addict Abingdon Engl*. 2009 Apr;104(4):554–63.  
42
- 43 25. McCambridge J, Hawkins B, Holden C. Vested Interests in Addiction Research and Policy. The  
44 challenge corporate lobbying poses to reducing society's alcohol problems: insights from UK  
45 evidence on minimum unit pricing. *Addiction*. 2014 Feb 1;109(2):199–205.  
46
- 47 26. Meng Y, Brennan A, Purshouse R, Hill-McManus D, Angus C, Holmes J, et al. Estimation of  
48 own and cross price elasticities of alcohol demand in the UK--A pseudo-panel approach using the  
49 Living Costs and Food Survey 2001–2009. *J Health Econ*. 2014 Mar;34:96–103.  
50
- 51  
52  
53  
54  
55  
56  
57  
58

- 1  
2  
3 27. Nelson JP. Does Heavy Drinking by Adults Respond to Higher Alcohol Prices and Taxes? A  
4 Survey and Assessment. *Econ Anal Policy*. 2013 Dec;43(3):265–91.  
5  
6 28. Nelson JP. Alcohol Affordability and Alcohol Demand: Cross-Country Trends and Panel Data  
7 Estimates, 1975 to 2008. *Alcohol Clin Exp Res*. 2014 Apr 1;38(4):1167–75.  
8  
9 29. Nelson JP. Estimating the Price Elasticity of Beer: Meta-Analysis of Data with Heterogeneity,  
10 Dependence, and Publication Bias [Internet]. Rochester, NY: Social Science Research Network; 2013  
11 Jan [cited 2016 Feb 27]. Report No.: ID 2200492. Available from:  
12 <http://papers.ssrn.com/abstract=2200492>  
13  
14 30. Nelson JP. Gender differences in alcohol demand: a systematic review of the role of prices  
15 and taxes. *Health Econ*. 2014 Oct;23(10):1260–80.  
16  
17 31. Nicholls J, Greenaway J. What is the problem?: Evidence, politics and alcohol policy in  
18 England and Wales, 2010–2014. *Drugs Educ Prev Policy*. 2015 Mar 4;22(2):135–42.  
19  
20 32. Record C, Day C. Britain’s alcohol market: how minimum alcohol prices could stop moderate  
21 drinkers subsidising those drinking at hazardous and harmful levels. *Clin Med*. 2009 Oct 1;9(5):421–  
22 5.  
23  
24 33. Rush B, Steinberg M, Brook R. The relationships among alcohol availability, alcohol  
25 consumption and alcohol-related damage in the Province of Ontario and the State of Michigan 1955-  
26 1982. *Adv Alcohol Subst Abuse*. 1986;5(4):33–45.  
27  
28 34. Shi Y. Three Essays on Economics of Health Behavior in China [Internet]. 2011 [cited 2016  
29 Mar 20]. Available from: [http://www.rand.org/pubs/rgs\\_dissertations/RGSD287.html](http://www.rand.org/pubs/rgs_dissertations/RGSD287.html)  
30  
31 35. Skov SJ, Chikritzhs TN, Kypri K, Miller PG, Hall WD, Daube MM, et al. Is the “alcopops” tax  
32 working? Probably yes but there is a bigger picture. *Med J Aust* [Internet]. 2011 [cited 2015 Nov  
33 9];195(2). Available from: [https://www.mja.com.au/journal/2011/195/2/alcopops-tax-working-](https://www.mja.com.au/journal/2011/195/2/alcopops-tax-working-probably-yes-there-bigger-picture)  
34 [probably-yes-there-bigger-picture](https://www.mja.com.au/journal/2011/195/2/alcopops-tax-working-probably-yes-there-bigger-picture)  
35  
36 36. Stockwell T, Williams N, Pauly B. Working and waiting: Homeless drinkers responses to less  
37 affordable alcohol. *Drug Alcohol Rev*. 2012 Sep 1;31(6):823–4.  
38  
39 37. Stockwell T, Zhao J, Martin G, Macdonald S, Vallance K, Treno A, et al. Misleading UK alcohol  
40 industry criticism of Canadian research on minimum pricing. *Addiction*. 2013 Jun 1;108(6):1172–3.  
41  
42 38. Tian G, Liu F. Is the demand for alcoholic beverages in developing countries sensitive to  
43 price? Evidence from China. *Int J Environ Res Public Health*. 2011 Jun;8(6):2124–31.  
44  
45 39. Xuan Z, Blanchette J, Nelson TF, Heeren T, Oussayef N, Naimi TS. The alcohol policy  
46 environment and policy subgroups as predictors of binge drinking measures among US adults. *Am J*  
47 *Public Health*. 2015 Apr;105(4):816–22.  
48  
49 40. Yashkin A. The Dynamics of Alcohol Consumption in the Russian Federation: Implications of  
50 Using Price Related Policies to Control Alcohol Use. *Grad Theses Diss* [Internet]. 2013 Jan 1; Available  
51 from: <http://scholarcommons.usf.edu/etd/4968>  
52  
53  
54  
55  
56  
57  
58

59 Online supplementary file to Boniface S, Scannell JW, Marlow S: *Evidence for the effectiveness of* 7  
60 *minimum pricing of alcohol: a systematic review and assessment using the Bradford Hill criteria*  
*for causality*  
For peer review only - <http://bmjopen.bmj.com/site/about/guidelines.xhtml>

- 1  
2  
3 41. Ally AK, Meng Y, Chakraborty R, Dobson PW, Seaton JS, Holmes J, et al. Alcohol tax pass-  
4 through across the product and price range: do retailers treat cheap alcohol differently? *Addiction*.  
5 2014 Dec 1;109(12):1994–2002.  
6  
7 42. Anderson P, Chisholm D, Fuhr DC. Effectiveness and cost-effectiveness of policies and  
8 programmes to reduce the harm caused by alcohol. *Lancet Lond Engl*. 2009 Jun 27;373(9682):2234–  
9 46.  
10  
11 43. Centre for Economics and Business Research. Minimum Alcohol Pricing: A targeted  
12 measure? Report to the Scottish Parliamentary Health and Sport Committee [Internet]. London;  
13 2010 Aug. Available from: [http://www.ias.org.uk/uploads/pdf/Price%20docs/Updated-Sheffield-](http://www.ias.org.uk/uploads/pdf/Price%20docs/Updated-Sheffield-Scotland-v2-August-20103.pdf)  
14 [Scotland-v2-August-20103.pdf](http://www.ias.org.uk/uploads/pdf/Price%20docs/Updated-Sheffield-Scotland-v2-August-20103.pdf)  
15  
16 44. Craven BM, Marlow ML, Shiers AF. The Economics of Minimum Pricing for Alcohol. *Econ Aff*.  
17 2013 Jun 1;33(2):174–89.  
18  
19 45. Duffy J, Snowdon C. The minimal evidence for minimum pricing [Internet]. Adam Smith  
20 Institute; Available from:  
21 [http://www.adamsmith.org/sites/default/files/research/files/ASI\\_SAPM.pdf](http://www.adamsmith.org/sites/default/files/research/files/ASI_SAPM.pdf)  
22  
23 46. Fitzgerald N, Angus C. Four Nations: How Evidence-based are Alcohol Policies and  
24 Programmes across the UK?. London: [Internet]. London: Alliance for Useful Evidence/Alcohol Health  
25 Alliance.; 2015. Available from: <http://www.alliance4usefulevidence.org/assets/Four-Nations-v3.pdf>  
26  
27 47. Gallet CA. The Demand for Alcohol: A Meta-Analysis of Elasticities [Internet]. Rochester, NY:  
28 Social Science Research Network; 2007 May [cited 2016 Jan 6]. Report No.: ID 985689. Available  
29 from: <http://papers.ssrn.com/abstract=985689>  
30  
31 48. Gray D, Siggers S, Atkinson D, Sputore B, Bourbon D. Beating the grog: an evaluation of the  
32 Tennant Creek liquor licensing restrictions. *Aust N Z J Public Health*. 2000 Feb;24(1):39–44.  
33  
34 49. Gruenewald PJ, Ponicki WR, Holder HD, Romelsjö A. Alcohol prices, beverage quality, and  
35 the demand for alcohol: quality substitutions and price elasticities. *Alcohol Clin Exp Res*. 2006  
36 Jan;30(1):96–105.  
37  
38 50. Hilton S, Wood K, Patterson C, Katikireddi SV. Implications for alcohol minimum unit pricing  
39 advocacy: What can we learn for public health from UK newsprint coverage of key claim-makers in  
40 the policy debate? *Soc Sci Med*. 2014 Feb;102:157–64.  
41  
42 51. Home Office. The likely impacts of increasing alcohol price: a summary review of the  
43 evidence base [Internet]. 2011 Jan. Available from:  
44 [https://www.gov.uk/government/uploads/system/uploads/attachment\\_data/file/98100/impacts-](https://www.gov.uk/government/uploads/system/uploads/attachment_data/file/98100/impacts-alcohol-price-review.pdf)  
45 [alcohol-price-review.pdf](https://www.gov.uk/government/uploads/system/uploads/attachment_data/file/98100/impacts-alcohol-price-review.pdf)  
46  
47 52. Institute for Fiscal Studies. Alcohol pricing and taxation policies. IFS Briefing Note BN124.  
48 2011.  
49  
50 53. Institute for Fiscal Studies. Price-based measures to reduce alcohol consumption. IFS Briefing  
51 Note BN138. 2013.

52  
53  
54  
55  
56  
57  
58  
59 Online supplementary file to Boniface S, Scannell JW, Marlow S: *Evidence for the effectiveness of* 8  
60 *minimum pricing of alcohol: a systematic review and assessment using the Bradford Hill criteria*  
*for causality*  
For peer review only - <http://bmjopen.bmj.com/site/about/guidelines.xhtml>

- 1  
2  
3 54. Goodliffe J. Applying a minimum price to alcohol (Institute of Alcohol Studies) [Internet].  
4 2014. Available from: [http://www.ias.org.uk/What-we-do/Publication-archive/Alcohol-](http://www.ias.org.uk/What-we-do/Publication-archive/Alcohol-Alert/October-2014/Applying-a-minimum-price-to-alcohol.aspx)  
5 [Alert/October-2014/Applying-a-minimum-price-to-alcohol.aspx](http://www.ias.org.uk/What-we-do/Publication-archive/Alcohol-Alert/October-2014/Applying-a-minimum-price-to-alcohol.aspx)  
6  
7  
8 55. Kisely S, Lawrence D. A time series analysis of alcohol-related presentations to emergency  
9 departments in Queensland following the increase in alcopops tax. *J Epidemiol Community Health*.  
10 2015 Sep 16;jech – 2015–205666.  
11  
12 56. Ludbrook A. Purchasing Patterns for Low Price Off Sales Alcohol: Evidence from the  
13 Expenditure and Food Survey [Internet]. Available from:  
14 [http://www.shaap.org.uk/images/UserFiles/File/Reports%20and%20Briefings/Briefing%20-](http://www.shaap.org.uk/images/UserFiles/File/Reports%20and%20Briefings/Briefing%20-%20Purchase%20of%20low-price%20alcohol%20analysis.pdf)  
15 [%20Purchase%20of%20low-price%20alcohol%20analysis.pdf](http://www.shaap.org.uk/images/UserFiles/File/Reports%20and%20Briefings/Briefing%20-%20Purchase%20of%20low-price%20alcohol%20analysis.pdf)  
16  
17  
18 57. Ornstein SI, Levy D. Price and Income Elasticities of Demand for Alcoholic Beverages. In:  
19 Galanter M, Begleiter H, Cicero T, Deitrich R, Goodwin DW, Gottheil E, et al., editors. *Genetics*  
20 *Behavioral Treatment Social Mediators and Prevention Current Concepts in Diagnosis* [Internet].  
21 Boston, MA: Springer US; 1983. p. 303–45. Available from: [http://dx.doi.org/10.1007/978-1-4613-](http://dx.doi.org/10.1007/978-1-4613-3617-4_18)  
22 [3617-4\\_18](http://dx.doi.org/10.1007/978-1-4613-3617-4_18)  
23  
24  
25 58. Rabinovich L, Brutscher P-B, de Vries H, Tiessen J, Clift J, Reding A. The affordability of  
26 alcoholic beverages in the European Union. 2012;  
27  
28 59. Radaev V. Impact of a New Alcohol Policy on Homemade Alcohol Consumption and Sales in  
29 Russia. *Alcohol Alcohol*. 2015 May 1;50(3):365–72.  
30  
31 60. Robinson M, McCartney G, Beeston C. What is convincing evidence on alcohol pricing? *BMJ*.  
32 2013 Aug 20;347:f5102.  
33  
34 61. Snowdon C. Chapter 10. Minimum unit pricing. In: *Flaws and Ceilings: Price controls and the*  
35 *damage they cause* [Internet]. [cited 2015 Nov 9]. p. 177–97. Available from:  
36 [http://www.iea.org.uk/publications/research/flaws-and-ceilings-price-controls-and-the-damage-](http://www.iea.org.uk/publications/research/flaws-and-ceilings-price-controls-and-the-damage-they-cause)  
37 [they-cause](http://www.iea.org.uk/publications/research/flaws-and-ceilings-price-controls-and-the-damage-they-cause)  
38  
39  
40 62. Wine and Spirits Trade Association. New claims that increasing the cost of alcohol saves lives  
41 are misleading [Internet]. Available from: [http://www.wsta.co.uk/press/634-new-claims-that-](http://www.wsta.co.uk/press/634-new-claims-that-increasing-the-cost-of-alcohol-saves-lives-are-misleading)  
42 [increasing-the-cost-of-alcohol-saves-lives-are-misleading](http://www.wsta.co.uk/press/634-new-claims-that-increasing-the-cost-of-alcohol-saves-lives-are-misleading)  
43  
44  
45 63. World Health Organization. European status report on alcohol and health 2014. Pricing  
46 policies [Internet]. World Health Organization; 2014. Available from:  
47 [http://www.euro.who.int/\\_\\_data/assets/pdf\\_file/0003/244902/Pricing-policies.pdf](http://www.euro.who.int/__data/assets/pdf_file/0003/244902/Pricing-policies.pdf)  
48  
49  
50  
51  
52  
53  
54  
55  
56  
57  
58

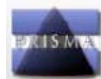

# PRISMA 2009 Checklist

| Section/topic                      | #  | Checklist item                                                                                                                                                                                                                                                                                              | Reported on page #                                |
|------------------------------------|----|-------------------------------------------------------------------------------------------------------------------------------------------------------------------------------------------------------------------------------------------------------------------------------------------------------------|---------------------------------------------------|
| <b>TITLE</b>                       |    |                                                                                                                                                                                                                                                                                                             |                                                   |
| Title                              | 1  | Identify the report as a systematic review, meta-analysis, or both.                                                                                                                                                                                                                                         | 1                                                 |
| <b>ABSTRACT</b>                    |    |                                                                                                                                                                                                                                                                                                             |                                                   |
| Structured summary                 | 2  | Provide a structured summary including, as applicable: background; objectives; data sources; study eligibility criteria, participants, and interventions; study appraisal and synthesis methods; results; limitations; conclusions and implications of key findings; systematic review registration number. | 2                                                 |
| <b>INTRODUCTION</b>                |    |                                                                                                                                                                                                                                                                                                             |                                                   |
| Rationale                          | 3  | Describe the rationale for the review in the context of what is already known.                                                                                                                                                                                                                              | 3                                                 |
| Objectives                         | 4  | Provide an explicit statement of questions being addressed with reference to participants, interventions, comparisons, outcomes, and study design (PICOS).                                                                                                                                                  | 3-4                                               |
| <b>METHODS</b>                     |    |                                                                                                                                                                                                                                                                                                             |                                                   |
| Protocol and registration          | 5  | Indicate if a review protocol exists, if and where it can be accessed (e.g., Web address), and, if available, provide registration information including registration number.                                                                                                                               | no published protocol                             |
| Eligibility criteria               | 6  | Specify study characteristics (e.g., PICOS, length of follow-up) and report characteristics (e.g., years considered, language, publication status) used as criteria for eligibility, giving rationale.                                                                                                      | 3-4                                               |
| Information sources                | 7  | Describe all information sources (e.g., databases with dates of coverage, contact with study authors to identify additional studies) in the search and date last searched.                                                                                                                                  | 3                                                 |
| Search                             | 8  | Present full electronic search strategy for at least one database, including any limits used, such that it could be repeated.                                                                                                                                                                               | 3                                                 |
| Study selection                    | 9  | State the process for selecting studies (i.e., screening, eligibility, included in systematic review, and, if applicable, included in the meta-analysis).                                                                                                                                                   | 3-4                                               |
| Data collection process            | 10 | Describe method of data extraction from reports (e.g., piloted forms, independently, in duplicate) and any processes for obtaining and confirming data from investigators.                                                                                                                                  | 4                                                 |
| Data items                         | 11 | List and define all variables for which data were sought (e.g., PICOS, funding sources) and any assumptions and simplifications made.                                                                                                                                                                       | Tables 2+3                                        |
| Risk of bias in individual studies | 12 | Describe methods used for assessing risk of bias of individual studies (including specification of whether this was done at the study or outcome level), and how this information is to be used in any data synthesis.                                                                                      | 4                                                 |
| Summary measures                   | 13 | State the principal summary measures (e.g., risk ratio, difference in means).                                                                                                                                                                                                                               | Not stated, as all summary measures were included |
| Synthesis of results               | 14 | Describe the methods of handling data and combining results of studies, if done, including measures of consistency (e.g., $I^2$ ) for each meta-analysis.                                                                                                                                                   | 4, and Table 1                                    |



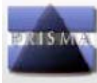

# PRISMA 2009 Checklist

| Section/topic                 | #  | Checklist item                                                                                                                                                                                           | Reported on page #                     |
|-------------------------------|----|----------------------------------------------------------------------------------------------------------------------------------------------------------------------------------------------------------|----------------------------------------|
| Risk of bias across studies   | 15 | Specify any assessment of risk of bias that may affect the cumulative evidence (e.g., publication bias, selective reporting within studies).                                                             | 4                                      |
| Additional analyses           | 16 | Describe methods of additional analyses (e.g., sensitivity or subgroup analyses, meta-regression), if done, indicating which were pre-specified.                                                         | 4                                      |
| <b>RESULTS</b>                |    |                                                                                                                                                                                                          |                                        |
| Study selection               | 17 | Give numbers of studies screened, assessed for eligibility, and included in the review, with reasons for exclusions at each stage, ideally with a flow diagram.                                          | Figure 1 and online supplementary file |
| Study characteristics         | 18 | For each study, present characteristics for which data were extracted (e.g., study size, PICOS, follow-up period) and provide the citations.                                                             | Tables 2+3                             |
| Risk of bias within studies   | 19 | Present data on risk of bias of each study and, if available, any outcome level assessment (see item 12).                                                                                                | Tables 2+3                             |
| Results of individual studies | 20 | For all outcomes considered (benefits or harms), present, for each study: (a) simple summary data for each intervention group (b) effect estimates and confidence intervals, ideally with a forest plot. | Tables 2+3, p18-20                     |
| Synthesis of results          | 21 | Present results of each meta-analysis done, including confidence intervals and measures of consistency.                                                                                                  | No meta-analysis, discussed p18-20     |
| Risk of bias across studies   | 22 | Present results of any assessment of risk of bias across studies (see Item 15).                                                                                                                          | discussed p21                          |
| Additional analysis           | 23 | Give results of additional analyses, if done (e.g., sensitivity or subgroup analyses, meta-regression [see Item 16]).                                                                                    | 18-20                                  |
| <b>DISCUSSION</b>             |    |                                                                                                                                                                                                          |                                        |
| Summary of evidence           | 24 | Summarize the main findings including the strength of evidence for each main outcome; consider their relevance to key groups (e.g., healthcare providers, users, and policy makers).                     | 20-21                                  |
| Limitations                   | 25 | Discuss limitations at study and outcome level (e.g., risk of bias), and at review-level (e.g., incomplete retrieval of identified research, reporting bias).                                            | 20-21                                  |
| Conclusions                   | 26 | Provide a general interpretation of the results in the context of other evidence, and implications for future research.                                                                                  | 20                                     |
| <b>FUNDING</b>                |    |                                                                                                                                                                                                          |                                        |
| Funding                       | 27 | Describe sources of funding for the systematic review and other support (e.g., supply of data); role of funders for the systematic review.                                                               | 22                                     |

From: Moher D, Liberati A, Tetzlaff J, Altman DG, The PRISMA Group (2009). Preferred Reporting Items for Systematic Reviews and Meta-Analyses: The PRISMA Statement. PLoS Med 6(7): e1000097. doi:10.1371/journal.pmed1000097

For more information, visit: [www.prisma-statement.org](http://www.prisma-statement.org).

# BMJ Open

## Evidence for the effectiveness of minimum pricing of alcohol: a systematic review and assessment using the Bradford Hill criteria for causality

|                                 |                                                                                                                                                                                                                                                                                                                                                         |
|---------------------------------|---------------------------------------------------------------------------------------------------------------------------------------------------------------------------------------------------------------------------------------------------------------------------------------------------------------------------------------------------------|
| Journal:                        | <i>BMJ Open</i>                                                                                                                                                                                                                                                                                                                                         |
| Manuscript ID                   | bmjopen-2016-013497.R1                                                                                                                                                                                                                                                                                                                                  |
| Article Type:                   | Research                                                                                                                                                                                                                                                                                                                                                |
| Date Submitted by the Author:   | 21-Nov-2016                                                                                                                                                                                                                                                                                                                                             |
| Complete List of Authors:       | Boniface, Sadie; King's College London, National Addiction Centre, Institute of Psychiatry, Psychology and Neuroscience<br>Scannell, Jack; University of Edinburgh, Innogen Institute, School of Social and Political Sciences<br>Marlow, Sally; King's College London, National Addiction Centre, Institute of Psychiatry, Psychology and Neuroscience |
| <b>Primary Subject Heading</b>: | Public health                                                                                                                                                                                                                                                                                                                                           |
| Secondary Subject Heading:      | Addiction                                                                                                                                                                                                                                                                                                                                               |
| Keywords:                       | alcohol, policy, minimum unit pricing, PUBLIC HEALTH, Bradford Hill                                                                                                                                                                                                                                                                                     |
|                                 |                                                                                                                                                                                                                                                                                                                                                         |

SCHOLARONE™  
Manuscripts



1  
2  
3 **Evidence for the effectiveness of minimum pricing of alcohol: a systematic**  
4 **review and assessment using the Bradford Hill criteria for causality**  
5  
6

7 Sadie Boniface,<sup>1</sup> Jack W Scannell,<sup>2</sup> Sally Marlow<sup>1</sup>  
8

9 <sup>1</sup>National Addiction Centre, Institute of Psychiatry, Psychology and Neuroscience, King's College  
10 London, London, UK  
11

12 <sup>2</sup>School of Social and Political Science, University of Edinburgh, Edinburgh, UK  
13

14 Corresponding author: Dr Sadie Boniface, National Addiction Centre, Addiction Sciences Building (PO  
15 48) Institute of Psychiatry, Psychology and Neuroscience, 16 De Crespigny Park, King's College  
16 London, SE5 8AF. [sadie.boniface@kcl.ac.uk](mailto:sadie.boniface@kcl.ac.uk) 020 7848 5097  
17

18 Keywords: alcohol, policy, minimum unit pricing, public health, Bradford Hill  
19

20 Word count: 3,224 (excluding title page, abstract, references, figures and tables)  
21  
22  
23  
24  
25  
26  
27  
28  
29  
30  
31  
32  
33  
34  
35  
36  
37  
38  
39  
40  
41  
42  
43  
44  
45  
46  
47  
48  
49  
50  
51  
52  
53  
54  
55  
56  
57  
58  
59  
60

## ABSTRACT

**Objectives:** To assess the evidence for price-based alcohol interventions to determine whether minimum unit pricing policies are likely to be effective.

**Design:** Systematic review and assessment of studies according to PRISMA guidelines, against the Bradford Hill criteria for causality. Three electronic databases were searched from inception to February 2016. Additional articles were found through hand searching and grey literature searches.

**Criteria for selecting studies:** We included any study design that reported on the effect of price changes and price-based interventions on alcohol consumption or alcohol-related morbidity, mortality, and wider harms. Studies reporting on the effects of taxation or affordability, and studies that only investigated price elasticity of demand were beyond the scope of this review. Studies with any conflict of interest were excluded. All studies were appraised for methodological quality.

**Results:** Of 756 studies assessed, 30 studies were included: 23 peer-reviewed research studies and 7 from the grey literature. All nine of the Bradford Hill criteria were met, although different types of study satisfied different criteria. For example, modelling studies complied with the consistency and specificity criteria, time series analyses demonstrated the temporality and experiment criteria, and the analogy criterion was fulfilled by comparing the findings with the wider literature on taxation and affordability.

**Conclusions:** Overall, the Bradford-Hill criteria for causality were satisfied. There was very little evidence that alcohol price was not associated with consumption or subsequent harms. However the overall quality of the evidence was variable, a large proportion of the evidence base has been produced by a small number of research teams, and the quantitative uncertainty in many estimates or forecasts is poorly communicated in the literature. None the less, price-based alcohol policy interventions such as minimum unit pricing are likely to reduce alcohol consumption, alcohol-related morbidity and mortality.

## ARTICLE SUMMARY

### Strengths and limitations of this study

- This review adds to an emerging literature of systematic reviews synthesising findings using the Bradford Hill criteria for causality in research areas where traditional meta-analyses of randomised controlled trials are not possible or appropriate
- A range of study designs were included, allowing for a comprehensive review of a disparate evidence base to investigate whether minimum unit pricing of alcohol is likely to reduce alcohol consumption and alcohol-related harm
- Studies examining the effects of alcohol taxation or changes in alcohol affordability, or studies solely reporting on price elasticity of demand, were not included
- Methodological quality of studies was variable

## INTRODUCTION

Alcohol-related harm costs the NHS £3.5bn each year and the estimated cost to society is £21 billion per year (1). The latest annual figures for England (population of 54 million) show over one million alcohol-related hospital admissions (2013/14) and six and a half thousand alcohol-related deaths (2013); and these figures represent increases compared with a decade previously of 115% and 10% respectively (1). There are many policies and programmes that aim to reduce harms from alcohol (2), and one of these is minimum pricing. Minimum pricing for alcohol has been introduced in a number of countries around the world including Canada (3), Belarus, Kyrgyzstan, the Republic of Moldova, the Russian Federation and Ukraine (4). In 2012 the UK coalition Government cited support for minimum unit pricing (MUP) in its alcohol strategy (5), and legislation to have a minimum price of £0.50 per unit (one UK unit = 10ml or 8g ethanol) was passed in Scotland the same year (4). In England and Wales there has been a ban on alcohol being sold at below cost (the total amount of 'duty plus VAT') since May 2014 (6); and the first conviction for selling alcohol below this level recently took place (7). Duty plus VAT is equivalent to a 70cl bottle of vodka (37.5% ABV) costing a minimum of £8.72 (8), whereas under a minimum price of 50 pence per unit this would cost £13.13.

Following the change from a Conservative and Liberal Democrat coalition Government to a Conservative majority Government in 2015, it is unclear whether there is still central Government support for MUP. There have been discussions in the Scottish courts between health organisations and the alcohol industry around the legality of MUP, proportionality (that the same objective cannot be met through increased taxation), and whether there is sufficient evidence. In a recent report about the extent to which UK alcohol policies are evidence-based, Fitzgerald and Angus wrote that "there are also a number of notable instances of policies being rejected due to 'insufficient evidence' with little indication of what level of evidence would be considered to be 'sufficient'" (9).

Taxation and price interventions are sometimes considered analogous, however it is at the retailers' discretion whether or not to pass on tax increases to consumers, but this is not the case for MUP. In this paper, we assess the effect of price and price-based interventions as MUP is currently being considered as a policy option in the United Kingdom. We systematically review the literature on the effect of price changes or policies such as MUP on alcohol consumption, alcohol-related morbidity and mortality, and wider harms. We use the nine Bradford Hill criteria for causality as a framework with the aim of assessing the likely effectiveness of MUP as a policy to reduce alcohol consumption and alcohol-related harm.

## METHODS

A systematic literature search was performed according to Preferred Reporting Items for Systematic Reviews and Meta-Analyses (PRISMA) guidance (see Figure 1 for PRISMA flow diagram and online supplementary file for excluded studies).

[figure 1 to go here]

### Identification of studies

Three electronic databases were searched for titles or abstracts containing "minimum unit price" OR "minimum price" OR "floor price" OR "price AND policy" AND alcohol. The databases were

1  
2  
3 PsycINFO (1806 to February Week 1 2016), Embase (1974 to 2016 Week 07), Ovid Medline (1946 to  
4 February Week 1 2016). We also searched the websites of five alcohol charities for publications or  
5 reports related to “price”, and also searched 20 leading UK think tanks for “alcohol” or “addiction”.  
6

7  
8 Inclusion criteria were: any study design; population level studies exploring at least one aspect of the  
9 effect of changes in the minimum price of alcohol, including but not limited to changes in alcohol  
10 sales, consumption, morbidity and mortality; individual level studies exploring differences in price  
11 paid for alcohol, and alcohol purchasing, consumption, morbidity and mortality; written in English.  
12

13 Exclusion criteria were: studies about taxation, affordability and price elasticity of demand for  
14 alcohol (there is a large literature on each of these already and reviewing all of these studies was  
15 beyond the scope of this review); studies about public perceptions of MUP; studies where a conflict  
16 of interest was reported in the paper, whether this was in favour of or against MUP.  
17  
18

19 All 32 studies that met the inclusion criteria were assessed against the Bradford Hill criteria for  
20 causality and the methodological quality appraised. These included 23 original research studies, 2  
21 systematic reviews, and 7 studies from the grey literature. Of the 23 research studies, there were 9  
22 cross sectional surveys, 8 time series analyses or similar, 4 econometric modelling studies, one  
23 qualitative study, and one trial.  
24

#### 25 26 **Analysis of included studies** 27

28 Quality of included studies was assessed independently by two reviewers and using validated tools.  
29 Due to the wide variation in study designs among the included studies, the Effective Public Health  
30 Practice Project’s (EPHPP) tool was used for assessing all quantitative studies, as recommended by  
31 the Cochrane Handbook for assessing studies in public health (10). Qualitative studies (n=1) and  
32 systematic reviews (n=2) included in this review were not covered by the EPHPP tool and so were  
33 assessed using the Critical Appraisal Skills Programme (CASP) tools specific to these study designs.  
34  
35

36 Nine criteria in order to determine causality were suggested by Bradford Hill in an influential 1965  
37 paper (11). Increasingly, the Bradford Hill criteria are a standard framework to assess the impact of  
38 interventions where it is not ethical or practical to conduct randomised controlled trials. Our  
39 interpretation of the Bradford Hill criteria for the purpose of this review is listed in Table 1. Two  
40 reviewers assessed each study against each of the nine criteria and agreed which studies provided  
41 relevant evidence for or against each criterion.  
42  
43  
44  
45  
46  
47  
48  
49  
50  
51  
52  
53  
54  
55  
56  
57  
58  
59  
60

Table 1: Bradford Hill criteria for assessing causation and the definitions used in this review

| Criterion                      | Bradford Hill criteria (1965)                                                                                                                                                                                                                                                         | Application in this review                                                                                                                                                                                                                                                          |
|--------------------------------|---------------------------------------------------------------------------------------------------------------------------------------------------------------------------------------------------------------------------------------------------------------------------------------|-------------------------------------------------------------------------------------------------------------------------------------------------------------------------------------------------------------------------------------------------------------------------------------|
| 1. Strength of the association | The strength of a supposed association between an intervention and an outcome is determined by the appropriate statistic used to measure the protective effect of an intervention (e.g. relative risk or odds ratio). This is the most important factor determining causation         | A statistically significant change ( $P < 0.05$ ) in alcohol consumption or alcohol related harms, in the expected direction. The exact magnitude of the association was assessed on a study by study basis                                                                         |
| 2. Consistency                 | Has it been repeatedly observed by different persons, in different places, circumstances and times?                                                                                                                                                                                   | Whether different studies conducted in different locations, in different populations, by different investigators and at different times have reported similar findings                                                                                                              |
| 3. Specificity                 | Specificity is present when the intervention is exclusive to the outcome and when the outcome has no other known cause or associated risk factors; cautions that this criterion should not be overemphasized and that if specificity is not apparent this does not preclude causation | If pricing was the only reason that alcohol consumption or alcohol-related harm could have fallen, this adds to the argument for causality. However if a price intervention was one of a number of alcohol policy interventions, then this criterion is not satisfied               |
| 4. Temporality                 | Refers to temporal relationship of association between exposure and disease outcome; to infer causality, exposure must precede outcome                                                                                                                                                | The pricing intervention studied must have taken place before a change in alcohol consumption or harm was observed                                                                                                                                                                  |
| 5. Dose-response               | If the association is one in which a dose-response curve or biological gradient can be observed, this adds to the case for causality                                                                                                                                                  | If interventions leading to a larger increase in prices had a greater effect on alcohol consumption and alcohol related harm than interventions where the price change was small, or if studies demonstrate that different prices have differing effects, in the expected direction |
| 6. Plausibility                | A likely biological mechanism linking the intervention to the observed findings helps to explain causality, plausibility depends on biological knowledge of the day                                                                                                                   | Studies that found an association between price and population-level alcohol consumption and that heavier drinkers tend to purchase the cheapest alcohol could demonstrate plausibility                                                                                             |
| 7. Coherence                   | When the evidence from different disciplines sources “hangs well together” and does not conflict with other generally known facts, this criterion is met                                                                                                                              | Describes whether studies conducted in different settings or disciplines had complementary findings. Will not be demonstrated by a single study in isolation but rather the evidence base as a whole                                                                                |
| 8. Experiment                  | Experimental evidence from laboratory studies or RCTs could potentially provide strongest support for causation                                                                                                                                                                       | In addition to laboratory studies and RCTs, natural experiments with before-and-after measures could also show the effectiveness                                                                                                                                                    |

|            |                                                                                                                                                                |                                                                                                                                                                                                                                     |
|------------|----------------------------------------------------------------------------------------------------------------------------------------------------------------|-------------------------------------------------------------------------------------------------------------------------------------------------------------------------------------------------------------------------------------|
|            | This criterion often provides the strongest support for causation and describes whether there is empirical evidence for the association                        | of minimum unit pricing in a 'real world' setting                                                                                                                                                                                   |
| 9. Analogy | Causality is supported by analogy if there are similar associations or causal relationships in other areas of relevance, weakest form of evidence of causality | Other areas of relevance include whether higher taxation on alcohol is associated with reduced alcohol consumption and alcohol related harm, and may require drawing on additional literature outside of the main systematic review |

**RESULTS**

The included studies that are published in peer-reviewed journals (23 research studies and two systematic reviews) are listed by study type in Table 2 with information on study characteristics and methodological quality. Of the research studies, the methodological quality was rated as 'strong' in 12 studies, 'moderate' in 8 studies, and 'weak' in 3 studies. Both of the systematic reviews were rated 'strong'. The seven reports from the grey literature are listed in Table 3. Five of the seven were rated as of 'strong' methodological quality, with the remaining two not appropriate to rate using our critical appraisal tool.

For peer review only

Table 2: Studies published in peer-reviewed journals included in Bradford Hill criteria assessment

| Study type                                   | First author and year published | Study characteristics |                                              |                                                          |                                                                                                                                                                |                                         | Study assessment |                      |                | Bradford Hill criteria met*                                                        |
|----------------------------------------------|---------------------------------|-----------------------|----------------------------------------------|----------------------------------------------------------|----------------------------------------------------------------------------------------------------------------------------------------------------------------|-----------------------------------------|------------------|----------------------|----------------|------------------------------------------------------------------------------------|
|                                              |                                 | Country               | Study design                                 | Population or participants                               | Pricing intervention studied                                                                                                                                   | Outcomes studied                        | Peer-reviewed    | Conflict of interest | Quality rating |                                                                                    |
| Natural experiments and time series analyses | Bhattacharya 2013 (12)          | Russia                | Time series analysis of panel data set       | Populations of 77 Russian oblasts (provinces), 1970-2000 | Substantial increases in administratively-set alcohol prices 1985-1988, along with 6 other anti-alcohol measures                                               | Mortality                               | Yes              | Not stated           | Strong         | SA, CON, TE, PL, CO, EX,                                                           |
|                                              | Herttua 2015 (13)               | Finland               | Time series analysis                         | General population using population registry             | Modelled 1% increase in the average minimum price of all alcoholic beverages based on actual price increases adjusted for inflation using Consumer Price Index | Alcohol related mortality               | Yes              | None                 | Strong         | SA (not universal findings – subgroup only), CON (counter findings) TE, PL, CO, EX |
|                                              | Stockwell 2012 (3)              | Canada                | Cross-section versus time series analysis of | Population of British Columbia                           | Actual minimum price increased over a 20 year period. Study modelled a 10%                                                                                     | Alcohol consumption (measured by sales) | Yes              | None                 | Strong         | SA, CON, TE, DR, CO, EX                                                            |



1  
2  
3  
4  
5  
6  
7  
8  
9  
10  
11  
12  
13  
14  
15  
16  
17  
18  
19  
20  
21  
22  
23  
24  
25  
26  
27  
28  
29  
30  
31  
32  
33  
34  
35  
36  
37  
38  
39  
40  
41  
42  
43  
44  
45  
46  
47  
48  
49

| Study type | First author and year published | Study characteristics |                                                              |                            |                                                                                                                                                                                                                        |                                         | Study assessment |                      |                | Bradford Hill criteria met* |
|------------|---------------------------------|-----------------------|--------------------------------------------------------------|----------------------------|------------------------------------------------------------------------------------------------------------------------------------------------------------------------------------------------------------------------|-----------------------------------------|------------------|----------------------|----------------|-----------------------------|
|            |                                 | Country               | Study design                                                 | Population or participants | Pricing intervention studied                                                                                                                                                                                           | Outcomes studied                        | Peer-reviewed    | Conflict of interest | Quality rating |                             |
|            |                                 |                       | ecological data                                              |                            | increase in the average minimum price of all alcoholic beverages adjusted by monthly Consumer Price Index adjusted by monthly Consumer Price Index                                                                     |                                         |                  |                      |                |                             |
|            | Stockwell 2012 (14)             | Canada                | Cross-section versus time series analysis of ecological data | Population of Saskatchewan | Actual minimum price increased over a 7 year period. Study modelled a 10% increase in the average minimum price of all alcoholic beverages adjusted by monthly Consumer Price Index adjusted by monthly Consumer Price | Alcohol consumption (measured by sales) | Yes              | Not stated           | Strong         | SA, CON, TE, DR, CO, EX     |

| Study type | First author and year published | Study characteristics |                                                                             |                                                        |                                                                                                                                                                                    |                                                  | Study assessment |                      |                | Bradford Hill criteria met* |
|------------|---------------------------------|-----------------------|-----------------------------------------------------------------------------|--------------------------------------------------------|------------------------------------------------------------------------------------------------------------------------------------------------------------------------------------|--------------------------------------------------|------------------|----------------------|----------------|-----------------------------|
|            |                                 | Country               | Study design                                                                | Population or participants                             | Pricing intervention studied                                                                                                                                                       | Outcomes studied                                 | Peer-reviewed    | Conflict of interest | Quality rating |                             |
|            |                                 |                       |                                                                             |                                                        | Index                                                                                                                                                                              |                                                  |                  |                      |                |                             |
|            | Stockwell 2013 (15)             | Canada                | Cross-section versus time series analysis of ecological data                | Populations of 89 geographic areas in British Columbia | Actual minimum price increased over a 20 year period. Study modelled 10% increase in the average minimum price of all alcoholic beverages adjusted by monthly Consumer Price Index | Alcohol-attributable hospital admissions         | Yes              | Not stated           | Strong         | SA, CON, TE, DR, PL, CO, EX |
|            | Treisman 2010 (16)              | Russia                | Secondary analysis of historical data with focus on price changes 1990-1994 | Population of Russia                                   | Price liberalisation of vodka in early 1990s - in 1993 real price of vodka was around 25% of that in 1990                                                                          | Mortality                                        | Yes              | Not stated           | Strong         | SA, CON, TE, PL, CO, EX     |
|            | Wald 1984 (17)                  | Poland                | Analysis of routine data 1970-1981                                          | Population of Poland                                   | Poor harvest led to high prices, rationing and illegal sales                                                                                                                       | Alcohol consumption and alcohol-related hospital | Yes              | Not stated           | Weak           | CON, TE, PL, CO, EX         |

| Study type        | First author and year published | Study characteristics |                                                              |                                                                                       |                                                                                                                                                                                                                   |                                                                | Study assessment |                      |                | Bradford Hill criteria met* |
|-------------------|---------------------------------|-----------------------|--------------------------------------------------------------|---------------------------------------------------------------------------------------|-------------------------------------------------------------------------------------------------------------------------------------------------------------------------------------------------------------------|----------------------------------------------------------------|------------------|----------------------|----------------|-----------------------------|
|                   |                                 | Country               | Study design                                                 | Population or participants                                                            | Pricing intervention studied                                                                                                                                                                                      | Outcomes studied                                               | Peer-reviewed    | Conflict of interest | Quality rating |                             |
|                   |                                 |                       |                                                              |                                                                                       |                                                                                                                                                                                                                   | admissions                                                     |                  |                      |                |                             |
|                   | Zhao 2013 (18)                  | Canada                | Cross-section versus time series analysis of ecological data | Populations of 16 Health Service Delivery Areas in British Columbia, Canada           | Actual minimum price increased over a 20 year period. Study modelled 10% increase in the average minimum price of all alcoholic beverages adjusted by monthly Consumer Price Index. Also looked at outlet density | Acute, chronic and wholly alcohol attributable mortality       | Yes              | None                 | Strong         | SA, CON, TE, DR, PL, CO, EX |
| Modelling studies | Brennan 2014 (19)               | England               | Modelling study using SAPM                                   | UK national surveys of general population (subgroups of moderate, harmful, hazardous) | MUP of £0.40, £0.45 and £0.50. Ban on below cost selling                                                                                                                                                          | Alcohol consumption, consumer spending, 47 health harms, QALYs | Yes              | None                 | Strong         | CON, SP, DR, PL, CO         |
|                   | Holmes 2014 (20)                | England               | Modelling study using SAPM                                   | UK national surveys of general                                                        | MUP of 45p                                                                                                                                                                                                        | Alcohol consumption, consumer                                  | Yes              | None                 | Strong         | CON, SP, PL, CO             |

Bradford-Hill assessment of the evidence for minimum pricing of alcohol

11

| Study type              | First author and year published | Study characteristics |                            |                                                                                       |                                                                               |                                                                            | Study assessment |                      |                | Bradford Hill criteria met* |
|-------------------------|---------------------------------|-----------------------|----------------------------|---------------------------------------------------------------------------------------|-------------------------------------------------------------------------------|----------------------------------------------------------------------------|------------------|----------------------|----------------|-----------------------------|
|                         |                                 | Country               | Study design               | Population or participants                                                            | Pricing intervention studied                                                  | Outcomes studied                                                           | Peer-reviewed    | Conflict of interest | Quality rating |                             |
|                         |                                 |                       |                            | population (subgroups of moderate, harmful, hazardous)                                |                                                                               | spending, 47 health harms, QALYs                                           |                  |                      |                |                             |
|                         | Meier 2009 (21)                 | UK                    | Modelling study using SAPM | UK national surveys of general population (subgroups of moderate, harmful, hazardous) | 10 pricing policy options, including different levels of MUP (of 33 analysed) | Alcohol consumption, consumer spending, 47 health harms, crime, employment | Yes              | None                 | Strong         | CON, SP, DR, PL, CO         |
|                         | Purshouse 2010 (22)             | England               | Modelling study using SAPM | UK national surveys of general population (subgroups of moderate, harmful, hazardous) | 18 different pricing policies                                                 | Alcohol consumption, consumer spending, 47 health harms, QALYs             | Yes              | None                 | Strong         | CON, SP, DR, PL, CO         |
| Cross-sectional studies | Black 2011(23)                  | Scotland              | Cross-sectional survey     | 377 hospital patients with serious alcohol problems                                   | Mean price paid per unit                                                      | Alcohol consumption                                                        | Yes              | None                 | Moderate       | SA CON, DR, PL, CO          |
|                         | Callinan 2015 (24)              | Australia             | Cross-sectional survey     | Drinkers 18+ participating in Australian                                              | Price paid for alcohol                                                        | Alcohol consumption                                                        | Yes              | Not stated           | Moderate       | SA, CON, DR, PL, CO         |

| Study type | First author and year published | Study characteristics |                        |                                                                                |                                                |                                            | Study assessment |                      |                | Bradford Hill criteria met* |
|------------|---------------------------------|-----------------------|------------------------|--------------------------------------------------------------------------------|------------------------------------------------|--------------------------------------------|------------------|----------------------|----------------|-----------------------------|
|            |                                 | Country               | Study design           | Population or participants                                                     | Pricing intervention studied                   | Outcomes studied                           | Peer-reviewed    | Conflict of interest | Quality rating |                             |
|            |                                 |                       |                        | International Alcohol Control study (n=1,681)                                  |                                                |                                            |                  |                      |                |                             |
|            | Casswell 2014 (25)              | New Zealand           | Cross-sectional survey | Drinkers 18+ participating in NZ International Alcohol Control study (n=1,900) | Price paid per drink in on and off trade       | Alcohol consumption                        | Yes              | Not stated           | Strong         | SA, CON, PL, CO             |
|            | Crawford 2012 (26)              | England               | Cross-sectional survey | 515 members of the public                                                      | Median price paid per unit                     | AUDIT score                                | Yes              | None                 | Moderate       | SA, CON, PL, CO             |
|            | Falkner 2015 (27)               | New Zealand           | Cross-sectional survey | 115 adults undergoing alcohol detoxification                                   | Price paid for alcohol                         | Alcohol consumption                        | Yes              | No                   | Moderate       | SA, CON, PL, CO             |
|            | Forsyth 2014 (28)               | Scotland              | Cross-sectional survey | Shopkeepers of 144 off licences in Glasgow                                     | MUP of £0.50                                   | Products affected, and hospital admissions | Yes              | None                 | Weak           | CON, PL (weakly), CO        |
|            | Ludbrook 2012 (29)              | UK                    | Cross-sectional survey | Expenditure and Food Survey data from 2006-8 (n=18,624)                        | Purchasers of alcohol less than £0.45 per unit | Income of purchasers of cheap alcohol      | Yes              | Not stated           | Moderate       | SA, CON, PL, CO             |

| Study type           | First author and year published | Study characteristics |                                     |                                                                        |                                                                                 |                                                            | Study assessment |                      |                | Bradford Hill criteria met* |
|----------------------|---------------------------------|-----------------------|-------------------------------------|------------------------------------------------------------------------|---------------------------------------------------------------------------------|------------------------------------------------------------|------------------|----------------------|----------------|-----------------------------|
|                      |                                 | Country               | Study design                        | Population or participants                                             | Pricing intervention studied                                                    | Outcomes studied                                           | Peer-reviewed    | Conflict of interest | Quality rating |                             |
|                      | Sharma 2014 (30)                | Australia             | Cross-sectional survey              | Representative sample of households (n=885) completing shopping survey | MUP of A\$1, and taxation                                                       | Alcohol consumption (measured by projected sales)          | Yes              | None                 | Moderate       | SA, CON, DR, PL, CO         |
|                      | Sheron 2014 (31)                | UK                    | Cross-sectional survey              | Adult patients in a liver unit of a hospital (n=204)                   | Median and mean price paid per unit                                             | Alcohol consumption                                        | Yes              | Not stated           | Moderate       | SA, CON, DR, PL, CO         |
| Intervention studies | Babor 1978 (32)                 | USA                   | Trial (not randomised)              | 34 male volunteers in live-in research facility                        | 'Happy Hour' with a reduction in price of alcohol for one group of participants | Alcohol consumption                                        | Yes              | Not stated           | Weak           | SA, CON, SP, TE, CO, EX     |
| Qualitative studies  | Seaman 2013 (33)                | Scotland              | Qualitative study                   | 130 participants aged 16-30                                            | Hypothetical price increases                                                    | Alcohol consumption and substitution with other substances | Yes              | None                 | Moderate       | CON, CO                     |
| Systematic reviews   | Wagenaar 2009 (34)              | Worldwide             | Systematic review and meta-analysis | Studies tended to cover general population                             | Alcohol price and taxation interventions studied together                       | Alcohol consumption (measured by alcohol sales or self-    | Yes              | None                 | Strong         | AN                          |

Bradford-Hill assessment of the evidence for minimum pricing of alcohol

14

1  
2  
3  
4  
5  
6  
7  
8  
9  
10  
11  
12  
13  
14  
15  
16  
17  
18  
19  
20  
21  
22  
23  
24  
25  
26  
27  
28  
29  
30  
31  
32  
33  
34  
35  
36  
37  
38  
39  
40  
41  
42  
43  
44  
45  
46  
47  
48  
49

| Study type | First author and year published | Study characteristics |                                     |                                            |                                                           |                                                                                                                                                            | Study assessment |                      |                | Bradford Hill criteria met* |
|------------|---------------------------------|-----------------------|-------------------------------------|--------------------------------------------|-----------------------------------------------------------|------------------------------------------------------------------------------------------------------------------------------------------------------------|------------------|----------------------|----------------|-----------------------------|
|            |                                 | Country               | Study design                        | Population or participants                 | Pricing intervention studied                              | Outcomes studied                                                                                                                                           | Peer-reviewed    | Conflict of interest | Quality rating |                             |
|            |                                 |                       |                                     |                                            |                                                           | reported consumption)                                                                                                                                      |                  |                      |                |                             |
|            | Wagenaar 2010 (35)              | Worldwide             | Systematic review and meta-analysis | Studies tended to cover general population | Alcohol price and taxation interventions studied together | Alcohol-related morbidity (disease, injury, suicide, traffic crashes, sexually transmitted diseases, other drug use, crime and misbehaviour) and mortality | Yes              | Not stated           | Strong         | AN                          |

\*Abbreviations used for the Bradford Hill criteria: strength of the association (SA), consistency (CON), specificity (SP), temporality (TE), dose-response (DR), plausibility (PL), coherence (CO), experiment (EX), analogy (AN)

Table 3: Studies published in the grey literature included in Bradford Hill criteria assessment

| Author and year published    | Study characteristics |                                         |                                                                                |                                                                                                                                               |                                                                                                    | Study assessment |                       |                      | Bradford Hill criteria met* |
|------------------------------|-----------------------|-----------------------------------------|--------------------------------------------------------------------------------|-----------------------------------------------------------------------------------------------------------------------------------------------|----------------------------------------------------------------------------------------------------|------------------|-----------------------|----------------------|-----------------------------|
|                              | Country               | Study design                            | Population or participants                                                     | Pricing intervention studied                                                                                                                  | Outcomes studied                                                                                   | Peer-reviewed?   | Conflict of interest? | Quality rating       |                             |
| Angus 2016 (36)              | Scotland              | Modelling study using SAPM              | Scottish general population survey (subgroups of moderate, harmful, hazardous) | MUP of 30p, 40p, 50p, 60p and 70p, compared with taxation interventions                                                                       | Alcohol consumption, consumer spending, exchequer and retail revenue, 47 health harms              | Not stated       | None                  | Strong               | CON, SP, DR, PL, CO         |
| Booth 2008 (37)              | Worldwide             | Review of reviews and systematic review | Studies tended to cover general population                                     | Various minimum unit prices and taxation interventions                                                                                        | Alcohol consumption and various measures of alcohol harm                                           | Yes              | None                  | Strong               | AN                          |
| Brennan 2008 (38)            | England               | Modelling study using SAPM              | Adults in England                                                              | General price increases. MUP of £0.20, £0.25, £0.30, £0.35, £0.40, £0.45, £0.50, £0.60 and £0.70. Restrictions on off-trade price promotions. | Alcohol consumption, consumer spending, sales duty and VAT, 47 health harms, crime, and employment | Not stated       | None                  | Strong               | CON, SP, DR, PL, CO         |
| Hill McManus 2012 (39)       | Canada                | Modelling study using SAPM              | Adults in two Canadian provinces (Ontario and British Columbia)                | MUP of C\$1.50                                                                                                                                | Alcohol consumption, consumer spending, hospital admissions, mortality, crime                      | No               | None                  | Strong               | CON, SP, PL, CO             |
| Institute for Fiscal Studies | Great Britain         | Economic modelling study                | Shopping data from 25,248 British households                                   | MUP of £0.45                                                                                                                                  | Alcohol consumption                                                                                | Not stated       | Not stated            | Not possible to rate | CON, SP, CO                 |



| Author and year published              | Study characteristics |                            |                             |                                                                                                                      |                                                                            | Study assessment |                       |                      | Bradford Hill criteria met* |
|----------------------------------------|-----------------------|----------------------------|-----------------------------|----------------------------------------------------------------------------------------------------------------------|----------------------------------------------------------------------------|------------------|-----------------------|----------------------|-----------------------------|
|                                        | Country               | Study design               | Population or participants  | Pricing intervention studied                                                                                         | Outcomes studied                                                           | Peer-reviewed?   | Conflict of interest? | Quality rating       |                             |
| 2010 (40)                              |                       | using market research data |                             |                                                                                                                      |                                                                            |                  |                       |                      |                             |
| Institute for Fiscal Studies 2013 (41) | Great Britain         | Economic analysis          | Population of Great Britain | MUP of £0.45 and increased alcohol taxation                                                                          | Alcohol consumption                                                        | Not stated       | Not stated            | Not possible to rate | CON, SP, CO                 |
| Meng 2010 (42)                         | Scotland              | Modelling study using SAPM | Adults in Scotland          | MUP of £0.20, £0.25, £0.30, £0.35, £0.40, £0.45, £0.50, £0.60 and £0.70. Restrictions on off-trade price promotions. | Alcohol consumption, consumer spending, 47 health harms, crime, employment | Not stated       | None                  | Strong               | CON, SP, DR, PL, CO         |

\*Abbreviations used for the Bradford Hill criteria: strength of the association (SA), consistency (CON), specificity (SP), temporality (TE), dose-response (DR), plausibility (PL), coherence (CO), experiment (EX), analogy (AN)

## Consideration against the Bradford Hill criteria for determining causality

### 1. Strength of the association

In 16/23 studies published in peer-reviewed journals, strength of the association between pricing and alcohol consumption or alcohol related harm was evidenced by a summary statistic such as an odds ratio, and by a test of the statistical significance of the association. As well as the statistical significance of the summary statistic, the magnitude of the effect was also considered, as a larger effect size corresponds to a greater population health impact. Studies in Canada found that 10% increases in minimum prices were associated with reductions in alcohol consumption of 3.4-8.4% (3,14), reductions in alcohol attributable hospital admissions of 9% (15), and reductions in alcohol-related mortality of 32%, each of which was statistically significant (18). Cross-sectional studies in the UK, Australia and New Zealand (23–27,29–31) and one trial from the USA (32) found statistically significant associations between cheaper alcohol and heavier drinking. The magnitude of the association varied across these studies but due to different study measures and outcomes the results are not all comparable. As an indication the odds ratio (OR) for buying cheap alcohol among heavier drinkers was 1.34 in Crawford's study (26) and 1.70 in Callinan's study (24), and in Casswell's study the odds of being a heavier drinker were roughly double among cheap alcohol purchasers (25). There was not any evidence to support this criterion from the grey literature. Overall there is reasonably good support for the strength of the association criterion.

### 2. Consistency

This criterion requires looking across all the studies included in the review to see whether similar conclusions have been drawn. Inverse associations between alcohol pricing and alcohol consumption or harm have been documented in countries in Europe, North America and Australia, and although most studies are from the last 10 years, there are studies from the 1970s and 1980s as well. There is evidence from different research teams and different types of study including cross-sectional studies, time series analyses and econometric modelling studies. Support for the consistency criterion is very strong.

### 3. Specificity

The specificity criterion relates to whether changes in alcohol consumption or harm could be attributed to anything other than the price intervention. Many studies included have statistically adjusted for confounding factors, however the best support for the specificity criterion comes from the econometric modelling studies because there is no risk of residual confounding. The Sheffield Alcohol Policy Model is one such model and has been applied in England (19–22,38), Scotland (36,42) and Canada (39) and provides very strong support for the specificity criterion. Further support is provided by other different modelling studies in the UK (40,41) and a trial in the US (32). Thus support for the specificity criteria is very strong.

### 4. Temporality

It is important that price changes or price interventions take place before changes to alcohol consumption and harm in order to attribute causality. Strong support for this criterion comes from research following the introduction of MUP in Canada, where price increases preceded reductions in alcohol consumption (3,14), alcohol attributable hospital admissions (15), and alcohol-related

1  
2  
3 mortality (18). Studies where price changes preceded the expected changes in alcohol consumption  
4 or harm have also been conducted in Russia (12,16), Poland (17), and Finland (13). Overall there is  
5 very strong support for the temporality criterion.  
6

#### 7 5. Dose-response/biological gradient

8  
9 This criterion is supported if different price levels have been found to have differing effects on  
10 consumption or harm. Many of the studies using the Sheffield Alcohol Policy Model explore the  
11 impact of a range of potential MUP options (19,21,22,36,42), and these consistently suggest that the  
12 higher the MUP, the greater the reductions in alcohol consumption or alcohol-related harms. The  
13 Canadian studies of minimum pricing lend further support for this criterion because the analysis  
14 presents the effect on consumption or harm of a modelled 1% increase in price, meaning dose-  
15 response can be inferred (3,14,15,18). Dose response is supported to a lesser extent by evidence  
16 from cross-sectional studies that heavier drinkers pay less for their alcohol (23,24,30,31). Overall,  
17 there is strong support for the dose-response criterion, although the relationship is difficult to  
18 quantify.  
19  
20  
21

#### 22 6. Plausibility

23  
24 This criterion refers to whether there is evidence that alcohol price can be used as an economic  
25 mechanism to influence consumption at a population level, and whether heavy drinkers tend to  
26 purchase cheaper alcohol. There is evidence from 11/28 research studies and 4/7 studies in the grey  
27 literature that the price of alcohol is inversely related to alcohol-related morbidity, hospital  
28 admissions, or mortality. Moreover, there is also evidence from numerous cross-sectional studies in  
29 the UK, Australia and New Zealand (23–27,29–31) and one trial from the USA (32) that heavier  
30 drinking was significantly associated with cheaper alcohol, suggesting that economic mechanisms  
31 such as minimum pricing would particularly affect the heaviest drinkers. This provides strong  
32 support for the plausibility criterion.  
33  
34  
35

#### 36 7. Coherence

37  
38 This criterion refers to whether studies from different disciplines have had complementary findings  
39 and whether these fit or ‘hang’ well together. It is different to consistency, which is more concerned  
40 with reproducibility of findings. The findings of the majority of studies supported the coherence  
41 criterion in that they suggest that real-world minimum unit pricing (e.g. (3,14,15,18)) or price  
42 increases (e.g. (12,13,17)) led to reductions in alcohol consumption and alcohol-related harm,  
43 modelling studies suggest heavier drinkers will be most affected by MUP (e.g. (20)), and cross  
44 sectional surveys find that it is the heavier drinkers that are drinking the cheapest alcohol (e.g.  
45 (23,31)). Overall the evidence base provides strong support for this criterion.  
46  
47  
48

#### 49 8. Experiment

50  
51 We have not identified any randomised controlled trials of minimum pricing or price-based  
52 interventions to reduce alcohol consumption. There is a small (and not randomised) trial from the  
53 1970s (32) which found participants living in controlled conditions and offered a daily ‘Happy Hour’  
54 discount drank significantly more alcohol than those who were not offered the discount. There is  
55 however substantial evidence in support of the experiment criterion from time series analyses or  
56 natural experiments, for example: where minimum pricing was introduced in Canada (3,14,15,18)  
57  
58  
59  
60

1  
2  
3 and where prices fluctuated in the late 1980s and early 1990s in Russia (12,16), and to a lesser  
4 extent in Finland, where price increases were associated with reduced mortality only among men  
5 with a basic education (13). These studies provide tentative support for the experiment criterion.  
6

### 7 8 9. Analogy

9  
10 To address the analogy criterion areas related to alcohol minimum pricing must be considered.  
11 There is evidence from literature on the affordability of alcohol (43) that consumption and harm are  
12 very responsive to the affordability of alcohol. Large systematic reviews have investigated the price  
13 elasticity of demand for alcohol (44), and have found that higher alcohol pricing and taxation  
14 (considered together) are associated with reductions in alcohol consumption, alcohol-related  
15 morbidity and mortality (34,35,37). There are a number of arguments favouring minimum pricing as  
16 an intervention over increased taxation. One of these is that increases in taxation can sometimes be  
17 absorbed by retailers or only 'passed-through' to consumers of more expensive products, keeping  
18 cheap alcohol at a low price (45). Overall the support for the analogy criterion is very strong,  
19 although Bradford Hill describes this as the weakest evidence for causality.  
20  
21

## 22 23 DISCUSSION

24  
25 We assessed 23 research studies and two systematic reviews, plus a further seven studies from the  
26 grey literature in this review of the evidence for priced based interventions – such as MUP - to  
27 reduce alcohol consumption and alcohol-related harm. All nine of the Bradford Hill criteria for  
28 causality were met. However, the evidence for two of the criteria, although present, was not as  
29 strong as it was for the other criteria. These criteria were strength of the association (criterion 1) and  
30 experiment (criterion 8), and according to Bradford Hill, these are the two criteria that can provide  
31 the strongest evidence for causality. Only a small minority of studies offered weak support for price-  
32 based alcohol policy interventions. Therefore although all of the criteria were supported, we  
33 conclude that it is highly probable, but not definite, that introducing MUP would reduce alcohol  
34 consumption and alcohol-related harms. It is also of note that different types of study tended to  
35 satisfy different Bradford Hill criteria, and that different study designs also produced evidence of the  
36 effectiveness of minimum pricing in relation to different outcomes. This is summarised in Figure 2.  
37 This underlines the importance of including a variety of study designs in this review.  
38  
39  
40

41  
42 [figure 2 to go here]

43  
44 Strengths of this study are that this is the first to have systematically reviewed the literature relevant  
45 specifically to alcohol minimum pricing policies. We had broad inclusion criteria with regards to  
46 study design, price intervention and outcome measure, allowing for a comprehensive review of the  
47 evidence base. Application of the Bradford Hill criteria as part of a narrative systematic literature  
48 review is a useful and emergent technique for identifying causality: a PubMed search for systematic  
49 reviews with Bradford Hill' mentioned in the title or abstract yielded 28 results, 90% of which were  
50 published in the last five years. The limitations of this systematic review relate mainly to the broad  
51 range of studies included. It was not possible to conduct any kind of meta-analysis and therefore we  
52 do not present a pooled estimate for the likely effect of MUP on certain outcomes. Occasionally,  
53 minimum pricing has been implemented as part of a range of measures (e.g. (12)), and these studies  
54 were considered alongside studies where MUP was implemented in isolation. This emphasises the  
55 importance of the specificity criterion. There were also challenges with the quality appraisal. The  
56  
57  
58  
59  
60

1  
2  
3 EPHPP quality assessment tool was used to assess studies. However it was not possible to appraise  
4 two of the studies from the grey literature using this tool, and there were some challenges assessing  
5 the econometric modelling studies against this framework. However overall we think that our  
6 quality appraisal across the different studies is broadly comparable. It should also be noted that  
7 although a number of studies were rated as 'strong', this is in relation to their respective study  
8 designs and does not reflect the position of the study type in the hierarchy of evidence framework.  
9

10  
11 This is the first systematic review that has addressed the effectiveness of price-based interventions  
12 for alcohol such as MUP using the Bradford Hill criteria. It was beyond the scope of this review to  
13 study the impact of generalised increases in alcohol prices (as opposed to minimum prices).  
14 However where such studies have been done, a minimum price or floor price has been  
15 recommended, for example in Gruenewald's 2006 study in Sweden which found that the lowest  
16 quality (the cheapest) alcohol has the highest price elasticity (46). Previous systematic reviews of  
17 alcohol price and consumption (34) and alcohol-related harm (35) have tended to consider the effect  
18 of price increases and increased taxation together. These reviews found significant effects on  
19 consumption and morbidity and mortality. Although price regulation and taxation are closely related  
20 policy options, evidence from surveys (45) and modelling studies (36) suggests that the effects of  
21 each are somewhat different, and this is why we chose to study only price in this review. It is  
22 important to highlight that a considerable proportion of included studies were produced by a small  
23 number of research teams. Also, with regards to the econometric modelling studies, uncertainty in  
24 estimates or forecasts is often poorly communicated outside of the academic literature. The overall  
25 risk of bias in the included studies was minimised by excluding studies with a conflict of interest  
26 (either for or against MUP). It was not possible to assess publication bias using an analytical  
27 technique such as a funnel plot due to the narrative nature of the review, however we anticipate  
28 that by including grey literature in this review we have mitigated publication bias as far as  
29 reasonably possible.  
30  
31

32  
33 Overall the findings of this review lend strong support for policies such as MUP in reducing alcohol  
34 consumption and alcohol-related harm, with all nine of the Bradford Hill criteria met and little by  
35 way of counter findings. As it is unlikely to be feasible to conduct randomised controlled trials (RCTs)  
36 of MUP, the decision whether or not to introduce MUP will not be based on a systematic review and  
37 meta-analysis of RCTs, and therefore this synthesis of the evidence base according to the Bradford  
38 Hill criteria is of value.  
39  
40

41  
42 Unanswered questions about the effectiveness of MUP remain, and in Scotland in particular, there  
43 are opportunities to address these. The Scottish Courts of Session in Edinburgh recently stated that  
44 minimum pricing is a proportionate measure and does not contravene EU law (47), however the  
45 Scotch Whisky Association intends to appeal to the Supreme Court (48).. If Scotland now rules to  
46 implement MUP, then it would be possible to evaluate the validity of the Sheffield Alcohol Policy  
47 Model studies conducted using Scottish data. It would also be possible to conduct a longitudinal  
48 study to evaluate the effectiveness of MUP in reducing alcohol consumption and alcohol-related  
49 morbidity and mortality. The findings of this natural experiment would have relevance elsewhere  
50 within and outside the UK.  
51  
52

#### 53 54 55 56 **ACKNOWLEDGEMENTS** 57 58 59 60

1  
2  
3 We would like to thank Rebecca McDonald for advice on using the Bradford Hill criteria in a  
4 systematic review, Dr James Nicholls for advice on study interpretation, and Dr Daniel Stahl for  
5 statistical advice on some of the included studies.  
6

### 7 8 **CONTRIBUTIONS**

9  
10 SM conceived the idea. SB conducted the initial search. SM and SM contributed to independently  
11 reviewing abstracts, hand-searching reference lists, completing data extraction, and conducting  
12 quality appraisal. All authors contributed to the analysis and interpretation of the results and  
13 contributed to writing the manuscript. SB is guarantor.  
14

### 15 16 **FUNDING**

17 This research received no specific grant from any funding agency in the public, commercial or not-  
18 for-profit sectors.  
19

### 20 21 **COMPETING INTERESTS**

22  
23 All authors have completed the ICMJE uniform disclosure form at [www.icmje.org/coi\\_disclosure.pdf](http://www.icmje.org/coi_disclosure.pdf)  
24 and declare: no support from any organisation for the submitted work; no financial relationships  
25 with any organisations that might have an interest in the submitted work in the previous three  
26 years; no other relationships or activities that could appear to have influenced the submitted work.  
27

28  
29 Two of the authors work at King's College London, which as an institution is listed as a member of  
30 the Alcohol Health Alliance. SM has received funding indirectly from UKCTAS, which as an institution  
31 is also listed as a member of the Alcohol Health Alliance. However none of the authors have any  
32 relationship with the Alcohol Health Alliance.  
33  
34  
35  
36  
37  
38  
39  
40  
41  
42  
43  
44  
45  
46  
47  
48  
49  
50  
51  
52  
53  
54  
55  
56  
57  
58  
59  
60

**FIGURE LEGENDS**

Figure 1: PRISMA 2009 flow diagram of studies in this systematic review

Figure 2: This model shows that different study types tended to produce evidence of effectiveness on minimum pricing in relation to different outcomes. Studies cited in the figure are key examples of the literature in that area and do not represent an exhaustive list.

**REFERENCES**

1. Lifestyles Statistics Team,, Health and Social Care Information Centre. Statistics on Alcohol. England, 2015 [Internet]. 2015 [cited 2016 Jun 3]. Available from: <http://www.hscic.gov.uk/catalogue/PUB17712/alc-eng-2015-rep.pdf>
2. Anderson P, Chisholm D, Fuhr DC. Effectiveness and cost-effectiveness of policies and programmes to reduce the harm caused by alcohol. *Lancet Lond Engl*. 2009 Jun 27;373(9682):2234–46.
3. Stockwell T, Auld MC, Zhao J, Martin G. Does minimum pricing reduce alcohol consumption? The experience of a Canadian province. *Addiction*. 2012 May 1;107(5):912–20.
4. World Health Organization. European status report on alcohol and health 2014. Pricing policies [Internet]. World Health Organization; 2014. Available from: [http://www.euro.who.int/\\_\\_data/assets/pdf\\_file/0003/244902/Pricing-policies.pdf](http://www.euro.who.int/__data/assets/pdf_file/0003/244902/Pricing-policies.pdf)
5. HM Government. The Government’s Alcohol Strategy [Internet]. 2012 [cited 2016 Jun 3]. Available from: [https://www.gov.uk/government/uploads/system/uploads/attachment\\_data/file/224075/alcohol-strategy.pdf](https://www.gov.uk/government/uploads/system/uploads/attachment_data/file/224075/alcohol-strategy.pdf)
6. Home Office. Guidance on banning the sale of alcohol below the cost of duty plus VAT. For suppliers of alcohol and enforcement authorities in England and Wales [Internet]. 2015 [cited 2016 Jun 3]. Available from: [https://www.gov.uk/government/uploads/system/uploads/attachment\\_data/file/415522/HO\\_Guidance\\_on\\_BBCS.pdf](https://www.gov.uk/government/uploads/system/uploads/attachment_data/file/415522/HO_Guidance_on_BBCS.pdf)
7. Off Licence News. First conviction for selling alcohol “below cost” sees retailer fined [Internet]. 2016 [cited 2016 Jun 3]. Available from: [http://www.offlicencenews.co.uk/news/fullstory.php/aid/15750/First\\_conviction\\_for\\_selling\\_alcohol\\_\\_below\\_cost\\_\\_sees\\_retailer\\_fined.html](http://www.offlicencenews.co.uk/news/fullstory.php/aid/15750/First_conviction_for_selling_alcohol__below_cost__sees_retailer_fined.html)
8. Home Office. Duty plus VAT permitted price calculator (2015) [Internet]. 2016. Available from: <https://www.gov.uk/government/publications/banning-the-sale-of-alcohol-below-the-cost-of-duty-plus-vat-march-2015>
9. Fitzgerald N, Angus C. Four Nations: How Evidence-based are Alcohol Policies and Programmes across the UK?. London: [Internet]. London: Alliance for Useful Evidence/Alcohol Health Alliance.; 2015. Available from: <http://www.alliance4usefulevidence.org/assets/Four-Nations-v3.pdf>



10. Cochrane Handbook. 21.4 Assessment of study quality and risk of bias [Internet]. [cited 2016 Jun 2]. Available from: [http://handbook.cochrane.org/chapter\\_21/21\\_4\\_assessment\\_of\\_study\\_quality\\_and\\_risk\\_of\\_bias.htm](http://handbook.cochrane.org/chapter_21/21_4_assessment_of_study_quality_and_risk_of_bias.htm)
11. Hill AB. The Environment and Disease: Association or Causation? *Proc R Soc Med*. 1965 May;58(5):295–300.
12. Bhattacharya J, Gathmann C, Miller G. The Gorbachev Anti-Alcohol Campaign and Russia's Mortality Crisis. *Am Econ J Appl Econ*. 2013;5(2):232–60.
13. Herttua K, Mäkelä P, Martikainen P. Minimum Prices for Alcohol and Educational Disparities in Alcohol-related Mortality. *Epidemiology*. 2015 May;26(3):337–43.
14. Stockwell T, Zhao J, Giesbrecht N, Macdonald S, Thomas G, Wettlaufer A. The Raising of Minimum Alcohol Prices in Saskatchewan, Canada: Impacts on Consumption and Implications for Public Health. *Am J Public Health*. 2012 Oct 18;102(12):e103–10.
15. Stockwell T, Zhao J, Martin G, Macdonald S, Vallance K, Treno A, et al. Minimum Alcohol Prices and Outlet Densities in British Columbia, Canada: Estimated Impacts on Alcohol-Attributable Hospital Admissions. *Am J Public Health*. 2013 Apr 18;103(11):2014–20.
16. Treisman D. Death and prices. *Econ Transit*. 2010 Apr 1;18(2):281–331.
17. Wald I, Moskalewicz J. Alcohol policy in a crisis situation. *Br J Addict*. 1984 Sep;79(3):331–5.
18. Zhao J, Stockwell T, Martin G, Macdonald S, Vallance K, Treno A, et al. The relationship between minimum alcohol prices, outlet densities and alcohol-attributable deaths in British Columbia, 2002–09. *Addiction*. 2013 Jun 1;108(6):1059–69.
19. Brennan A, Meng Y, Holmes J, Hill-McManus D, Meier PS. Potential benefits of minimum unit pricing for alcohol versus a ban on below cost selling in England 2014: modelling study. *The BMJ*. 2014 Sep 30;349:g5452.
20. Holmes J, Meng Y, Meier PS, Brennan A, Angus C, Campbell-Burton A, et al. Effects of minimum unit pricing for alcohol on different income and socioeconomic groups: a modelling study. *The Lancet*. 2014 May 16;383(9929):1655–64.
21. Meier PS, Purshouse R, Brennan A. Policy options for alcohol price regulation: the importance of modelling population heterogeneity. *Addiction*. 2010 Mar 1;105(3):383–93.
22. Purshouse RC, Meier PS, Brennan A, Taylor KB, Rafia R. Estimated effect of alcohol pricing policies on health and health economic outcomes in England: an epidemiological model. *The Lancet*. 2010 Apr;375(9723):1355–64.
23. Black H, Gill J, Chick J. The price of a drink: levels of consumption and price paid per unit of alcohol by Edinburgh's ill drinkers with a comparison to wider alcohol sales in Scotland. *Addiction*. 2011 Apr 1;106(4):729–36.



- 1
- 2
- 3 24. Callinan S, Room R, Livingston M, Jiang H. Who Purchases Low-Cost Alcohol in
- 4 Australia? *Alcohol Alcohol*. 2015 Jun 24;agv066.
- 5
- 6 25. Casswell S, Huckle T, Wall M, Yeh LC. International alcohol control study: pricing data
- 7 and hours of purchase predict heavier drinking. *Alcohol Clin Exp Res*. 2014
- 8 May;38(5):1425–31.
- 9
- 10 26. Crawford MJ, Parry AMH, Weston ARW, Seretis D, Zauter-Tutt M, Hussain A, et al.
- 11 Relationship between price paid for off-trade alcohol, alcohol consumption and income in
- 12 England: a cross-sectional survey. *Alcohol Alcohol Oxf Oxf*. 2012 Dec;47(6):738–42.
- 13
- 14 27. Falkner C, Christie G. The effect of alcohol price on dependent drinkers' alcohol
- 15 consumption. *N Z Med J*. 2015;128(1427).
- 16
- 17 28. Forsyth AJM, Ellaway A, Davidson N. How Might the Alcohol Minimum Unit Pricing
- 18 (MUP) Impact upon Local Off-Sales Shops and the Communities Which They Serve?
- 19 *Alcohol Alcohol*. 2014 Jan 1;49(1):96–102.
- 20
- 21 29. Ludbrook PA, Petrie D, McKenzie L, Farrar S. Tackling alcohol misuse: Purchasing
- 22 patterns affected by minimum pricing for alcohol. *Appl Health Econ Health Policy*. 2012
- 23 Aug 6;10(1):51–63.
- 24
- 25 30. Sharma A, Vandenberg B, Hollingsworth B. Minimum Pricing of Alcohol versus
- 26 Volumetric Taxation: Which Policy Will Reduce Heavy Consumption without Adversely
- 27 Affecting Light and Moderate Consumers? *PLoS ONE*. 2014 Jan 22;9(1):e80936.
- 28
- 29 31. Sheron N, Chilcott F, Matthews L, Challoner B, Thomas M. Impact of minimum price
- 30 per unit of alcohol on patients with liver disease in the UK. *Clin Med*. 2014 Aug
- 31 1;14(4):396–403.
- 32
- 33 32. Babor TF, Mendelson JH, Greenberg I, Kuehnle J. Experimental analysis of the 'happy
- 34 hour": effects of purchase price on alcohol consumption. *Psychopharmacology (Berl)*.
- 35 1978 Jun 15;58(1):35–41.
- 36
- 37 33. Seaman P, Edgar F, Ikegwuonu T. The role of alcohol price in young adult drinking
- 38 cultures in Scotland. *Drugs Educ Prev Policy*. 2013 Aug 1;20(4):278–85.
- 39
- 40 34. Wagenaar AC, Salois MJ, Komro KA. Effects of beverage alcohol price and tax levels on
- 41 drinking: a meta-analysis of 1003 estimates from 112 studies. *Addict Abingdon Engl*.
- 42 2009 Feb;104(2):179–90.
- 43
- 44 35. Wagenaar AC, Tobler AL, Komro KA. Effects of alcohol tax and price policies on
- 45 morbidity and mortality: a systematic review. *Am J Public Health*. 2010
- 46 Nov;100(11):2270–8.
- 47
- 48 36. Angus C, Holmes J, Pryce R, Meier P, Brennan A. Model-based appraisal of the
- 49 comparative impact of Minimum Unit Pricing and taxation policies in Scotland An
- 50 adaptation of the Sheffield Alcohol Policy Model version 3 [Internet]. ScHARR,
- 51 University of Sheffield; 2016 Apr [cited 2016 Apr 7]. Available from:
- 52 [https://www.shef.ac.uk/polopoly\\_fs/1.565373!/file/Scotland\\_report\\_2016.pdf](https://www.shef.ac.uk/polopoly_fs/1.565373!/file/Scotland_report_2016.pdf)
- 53
- 54
- 55
- 56
- 57
- 58
- 59
- 60

- 1  
2  
3 37. Booth A, Brennan A, Meier PS, O'Reilly D, Purshouse R, Stockwell T, et al. Independent  
4 review of the effects of alcohol pricing and promotion: part A – systematic reviews.  
5 Project Report for the Department of Health September 2008. ScHARR University of  
6 Sheffield; 2008.  
7
- 8  
9 38. Brennan A, Purshouse R, Taylor K, Rafia R. Independent review of the effects of alcohol  
10 pricing and promotion: part B. Modelling the Potential Impact of Pricing and Promotion  
11 Policies for Alcohol in England: Results from the Sheffield Alcohol Policy Model  
12 Version 2008(1-1) [Internet]. ScHARR University of Sheffield; 2008. Available from:  
13 [https://www.shef.ac.uk/polopoly\\_fs/1.95621!/file/PartB.pdf](https://www.shef.ac.uk/polopoly_fs/1.95621!/file/PartB.pdf)  
14
- 15 39. Hill McManus D, Brennan A, Stockwell T, Giesbrecht N, Thomas G, Zhao J, et al.  
16 Model-based appraisal of alcohol minimum pricing in Ontario and British Columbia: A  
17 Canadian adaptation of the Sheffield Alcohol Policy Model Version 2 [Internet]. 2012.  
18 Available from: [http://www.uvic.ca/research/centres/carbc/assets/docs/report-model-](http://www.uvic.ca/research/centres/carbc/assets/docs/report-model-based-appraisal.pdf)  
19 [based-appraisal.pdf](http://www.uvic.ca/research/centres/carbc/assets/docs/report-model-based-appraisal.pdf)  
20
- 21 40. Institute for Fiscal Studies. The Impact of Introducing a Minimum Price on Alcohol in  
22 Britain. IFS Briefing Note BN109. 2010.  
23
- 24 41. Institute for Fiscal Studies. Price-based measures to reduce alcohol consumption. IFS  
25 Briefing Note BN138. 2013.  
26
- 27 42. Meng Y, Purshouse R, Brennan A, Meier PS. Model-based appraisal of alcohol minimum  
28 pricing and off-licensed trade discount bans in Scotland using the Sheffield Alcohol  
29 Policy Model (v.2): Second update based on newly available data [Internet]. 2010.  
30 Available from: [http://www.shef.ac.uk/polopoly\\_fs/1.96510!/file/scotlandupdate.pdf](http://www.shef.ac.uk/polopoly_fs/1.96510!/file/scotlandupdate.pdf)  
31  
32
- 33 43. Rabinovich L, Brutscher P-B, de Vries H, Tiessen J, Clift J, Reding A. The affordability  
34 of alcoholic beverages in the European Union. 2012;  
35
- 36 44. Gallet CA. The Demand for Alcohol: A Meta-Analysis of Elasticities [Internet].  
37 Rochester, NY: Social Science Research Network; 2007 May [cited 2016 Jan 6]. Report  
38 No.: ID 985689. Available from: <http://papers.ssrn.com/abstract=985689>  
39
- 40 45. Ally AK, Meng Y, Chakraborty R, Dobson PW, Seaton JS, Holmes J, et al. Alcohol tax  
41 pass-through across the product and price range: do retailers treat cheap alcohol  
42 differently? *Addiction*. 2014 Dec 1;109(12):1994–2002.  
43  
44
- 45 46. Gruenewald PJ, Ponicki WR, Holder HD, Romelsjö A. Alcohol prices, beverage quality,  
46 and the demand for alcohol: quality substitutions and price elasticities. *Alcohol Clin Exp*  
47 *Res*. 2006 Jan;30(1):96–105.  
48
- 49 47. Judiciary of Scotland. Scotch Whisky Association and others v Lord Advocate and  
50 Advocate General for Scotland [Internet]. [cited 2016 Jul 11]. Available from:  
51 [http://www.scotland-judiciary.org.uk/9/1672/Scotch-Whisky-Association-and-others-v-](http://www.scotland-judiciary.org.uk/9/1672/Scotch-Whisky-Association-and-others-v-Lord-Advocate-and-Advocate-General-for-Scotland)  
52 [Lord-Advocate-and-Advocate-General-for-Scotland](http://www.scotland-judiciary.org.uk/9/1672/Scotch-Whisky-Association-and-others-v-Lord-Advocate-and-Advocate-General-for-Scotland)  
53
- 54 48. Scotch Whisky Association. The SWA on its decision to appeal minimum unit pricing  
55 (MUP) ruling [Internet]. 2016. Available from: [http://www.scotch-whisky.org.uk/news-](http://www.scotch-whisky.org.uk/news-publications/news/the-swa-on-its-decision-to-appeal-minimum-unit-pricing-(mup)-ruling/#.WDMngbKLSM_)  
56 [publications/news/the-swa-on-its-decision-to-appeal-minimum-unit-pricing-\(mup\)-](http://www.scotch-whisky.org.uk/news-publications/news/the-swa-on-its-decision-to-appeal-minimum-unit-pricing-(mup)-ruling/#.WDMngbKLSM_)  
57 [ruling/#.WDMngbKLSM\\_](http://www.scotch-whisky.org.uk/news-publications/news/the-swa-on-its-decision-to-appeal-minimum-unit-pricing-(mup)-ruling/#.WDMngbKLSM_)  
58  
59  
60

1  
2  
3  
4  
5  
6  
7  
8  
9  
10  
11  
12  
13  
14  
15  
16  
17  
18  
19  
20  
21  
22  
23  
24  
25  
26  
27  
28  
29  
30  
31  
32  
33  
34  
35  
36  
37  
38  
39  
40  
41  
42  
43  
44  
45  
46  
47  
48  
49  
50  
51  
52  
53  
54  
55  
56  
57  
58  
59  
60

For peer review only

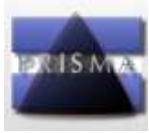

## PRISMA 2009 Flow Diagram

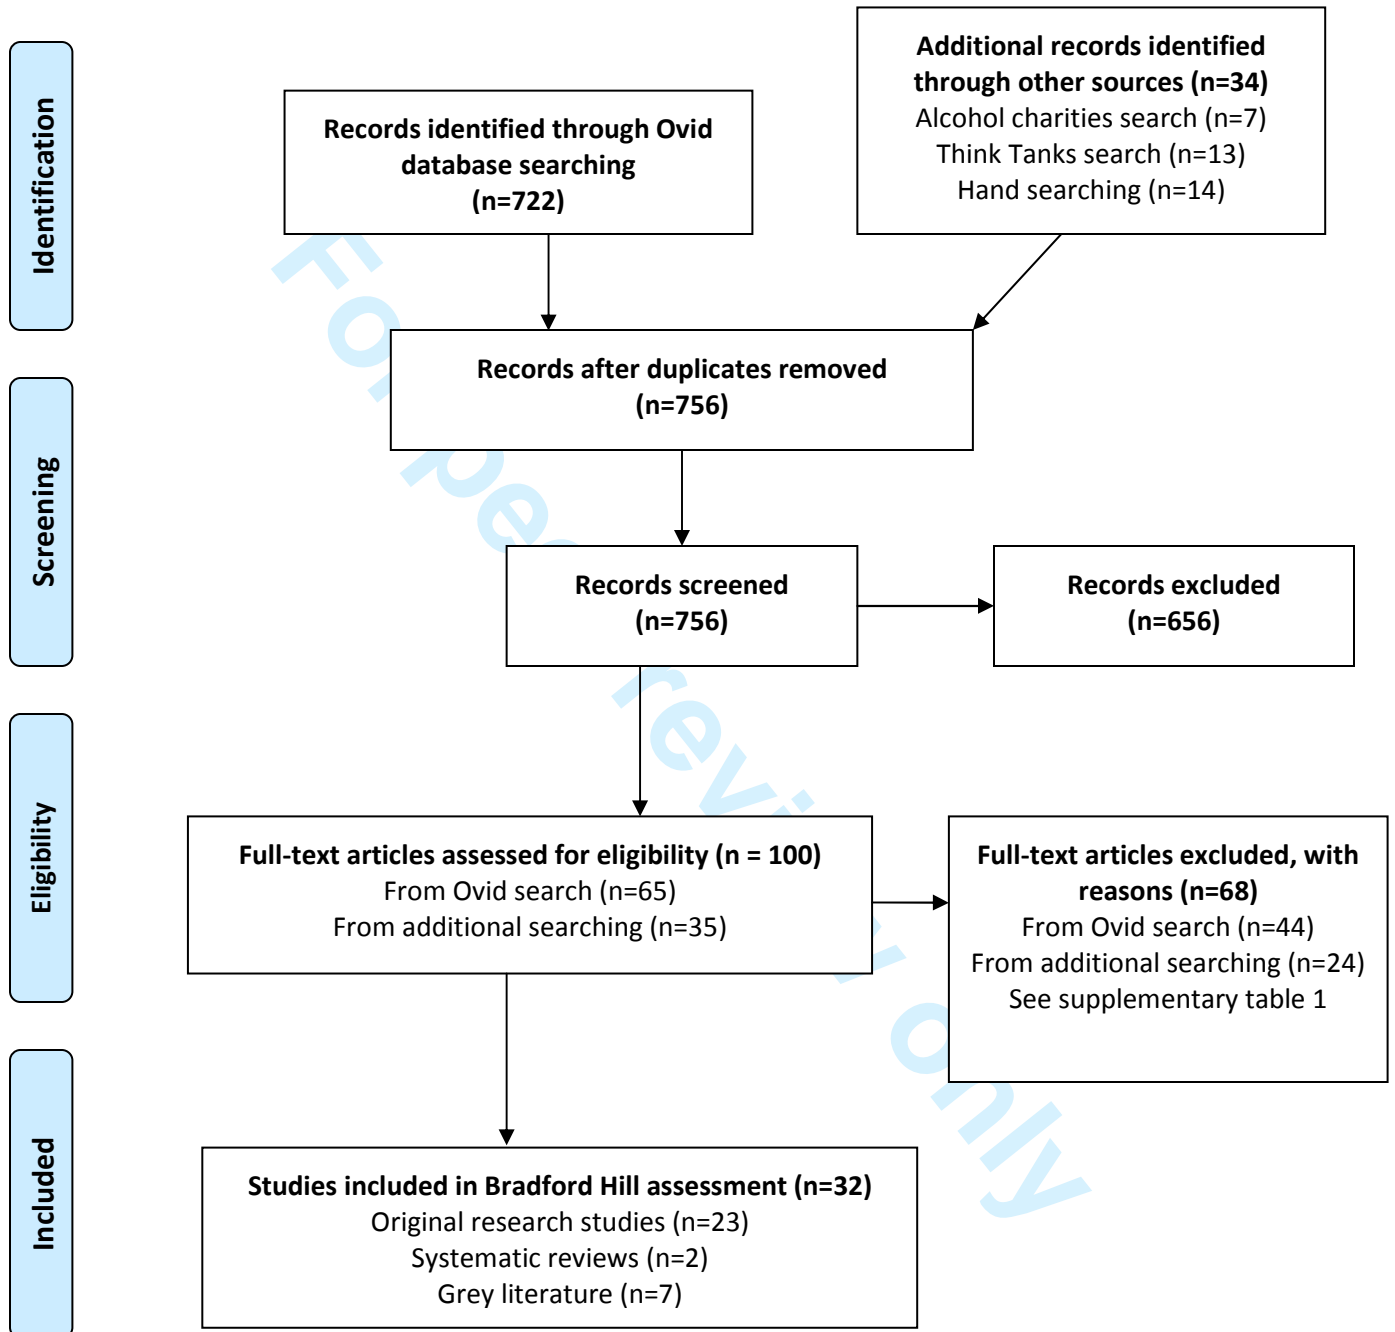

From: Moher D, Liberati A, Tetzlaff J, Altman DG, The PRISMA Group (2009). Preferred Reporting Items for Systematic Reviews and Meta-Analyses: The PRISMA Statement. PLoS Med 6(6): e1000097. doi:10.1371/journal.pmed1000097

For more information, visit [www.prisma-statement.org](http://www.prisma-statement.org).

For peer review only - <http://bmjopen.bmj.com/site/about/guidelines.xhtml>

1  
2  
3  
4  
5  
6  
7  
8  
9  
10  
11  
12  
13  
14  
15  
16  
17  
18  
19  
20  
21  
22  
23  
24  
25  
26  
27  
28  
29  
30  
31  
32  
33  
34  
35  
36  
37  
38  
39  
40  
41  
42  
43  
44  
45  
46  
47  
48  
49

Figure 2: Areas of evidence for the effectiveness of minimum pricing of alcohol, with key examples

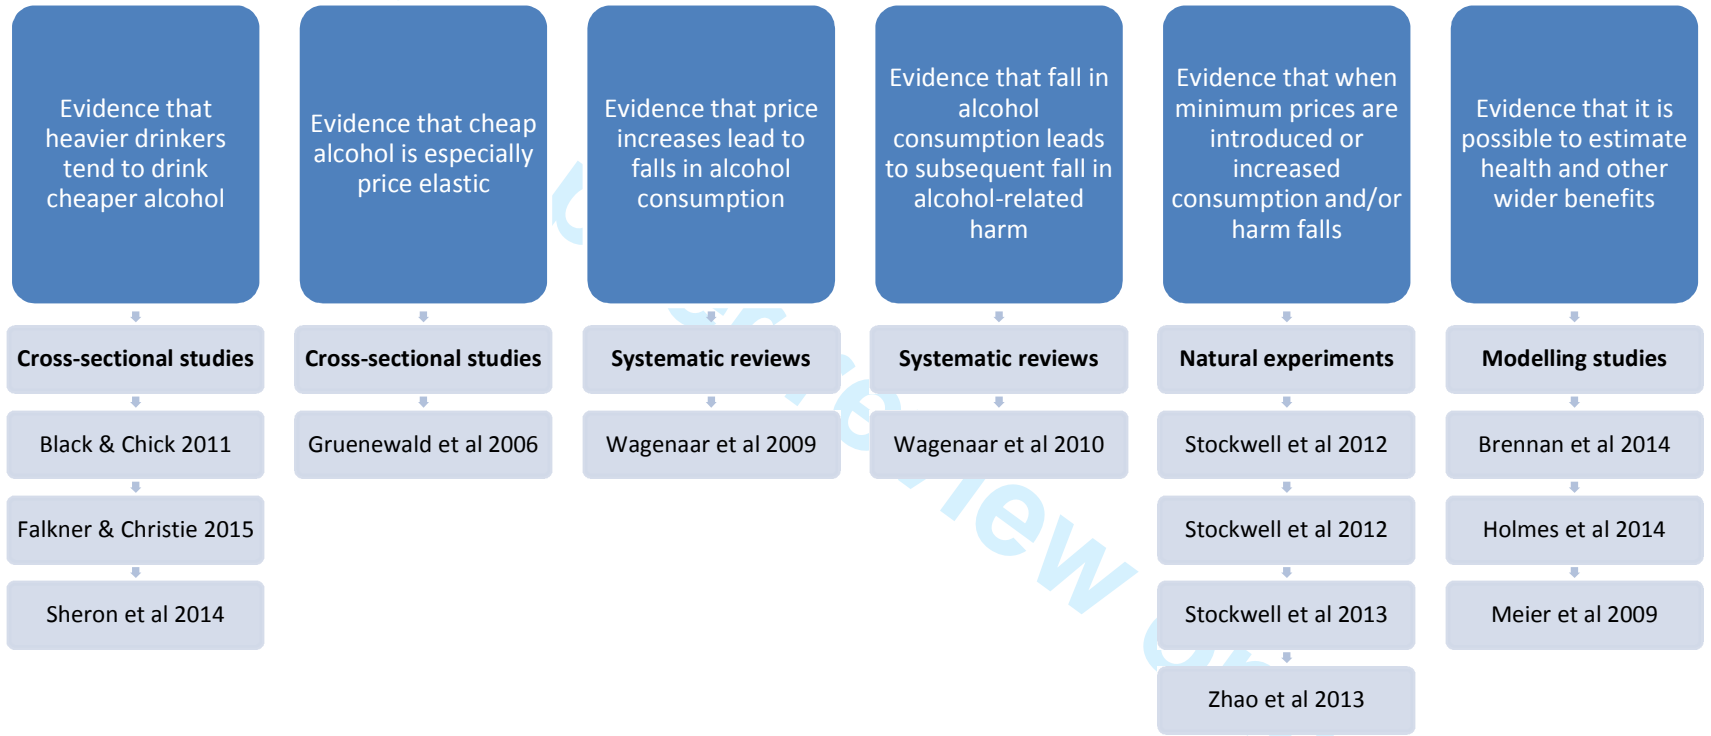

### Online supplementary table: identified studies where full text assessed, then not included in review

| Source      | Author and year published | Study type                                                                              | Reason excluded                                                                                        |
|-------------|---------------------------|-----------------------------------------------------------------------------------------|--------------------------------------------------------------------------------------------------------|
| Ovid search | Aage 2012 (1)             | Time series analysis                                                                    | Affordability, not price                                                                               |
|             | Ayyagari 2013 (2)         | Econometric analysis of price and consumption data                                      | Price elasticities of demand only                                                                      |
|             | Bellis 2009 (3)           | Cross-sectional surveys                                                                 | Association between drink type and price, and drink type and harms, but not directly reported in paper |
|             | Bennetts 2008 (4)         | Review (not systematic)                                                                 | Review of a report (not a research study)                                                              |
|             | Callinan 2015 (5)         | Editorial (not a research study)                                                        | Editorial about different pricing, taxation and affordability measures, not a research study           |
|             | Chalmers 2013 (6)         | Commentary (not a research study)                                                       | Is a commentary about challenges to MUP e.g. industry and the law                                      |
|             | Chaloupka 2002 (7)        | Review (not systematic)                                                                 | Review of previous economic studies (not systematic)                                                   |
|             | Chick 2012 (8)            | Editorial (not a research study)                                                        | Is about bans on multi-buys, not minimum price                                                         |
|             | Cook 2014 (9)             | Analysis of cross-sectional survey data and alcohol policies                            | Affordability not price (GDP PPP)                                                                      |
|             | Duffy 1981 (10)           | Econometric time series analysis                                                        | Talks about elasticities in relation to duty rises not MUP. NB is M duffy, not J duffy                 |
|             | Giesbrecht 2003 (11)      | Review (not systematic)                                                                 | Review of previous studies (not systematic)                                                            |
|             | Giesbrecht 2015 (12)      | Policy analysis                                                                         | Does not relate price intervention to consumption or harm                                              |
|             | Gilligan 2012 (13)        | Cross-sectional survey and policy analysis                                              | Price changes, not minimum prices                                                                      |
|             | Grossman 2004 (14)        | Economic analysis                                                                       | Tax (federal excise tax increase) not MUP                                                              |
|             | Hadland 2015 (15)         | Policy analysis                                                                         | Effects of numerous alcohol policies considered together                                               |
|             | Heeb 2003 (16)            | Natural experiment: longitudinal survey 3 months before and 3 months after price change | Tax, not price intervention                                                                            |

|                                  |                                                              |                                                                                                              |
|----------------------------------|--------------------------------------------------------------|--------------------------------------------------------------------------------------------------------------|
| Hogan 2006 (17)                  | Natural experiment/evaluation                                | Tax, not price intervention                                                                                  |
| Jónsson 2013 (18)                | Cross-sectional surveys and routine data                     | Policies included tax and other supply side policies, but not MUP                                            |
| Katikireddi 2012 (19)            | Commentary (not a research study)                            | Is a commentary about legal considerations of MUP, not effectiveness                                         |
| Katikireddi 2014 (20)            | Qualitative study                                            | Stakeholder views of MUP, not effectiveness                                                                  |
| Khaltourina 2015 (21)            | Cross-sectional surveys and routine data                     | Tax, not price intervention                                                                                  |
| Knibbe 2014 (22)                 | Analysis of cross-sectional survey data and alcohol policies | No price intervention studied, price investigated more as a covariate                                        |
| Lindeman 2013 (23)               | Cross-sectional surveys and routine data                     | Tax, not price intervention                                                                                  |
| Lonsdale 2012 (24)               | Qualitative study                                            | Public opinion of policy, nothing about effectiveness                                                        |
| Mäkelä 2009 (25)                 | Review (not systematic) and analysis of routine data         | Tax, not price intervention                                                                                  |
| McCambridge 2014 (26)            | Document analysis and qualitative interviews                 | Corporate lobbying, not the effectiveness of MUP                                                             |
| Meng 2014 (27)                   | Econometric analysis using pseudo panel                      | Price elasticities of demand only                                                                            |
| Nelson 2013 (28)                 | Review (not systematic)                                      | Conflict of interest (funded by International Center for Alcohol Policies).                                  |
| Nelson 2014 (affordability) (29) | Analysis of routine data and economic modelling              | Affordability not price, and conflict of interest (funded by International Center for Alcohol Policies).     |
| Nelson 2014 (elasticities) (30)  | Economic modelling                                           | Conflict of interest (funded by International Center for Alcohol Policies).                                  |
| Nelson 2014 (gender) (31)        | Systematic review                                            | Conflict of interest (funded by International Center for Alcohol Policies).                                  |
| Nicholls & Greenaway 2015 (32)   | Policy analysis                                              | Is about policy framing, not the effectiveness of MUP                                                        |
| Record 2009 (33)                 | Modelling study                                              | Conflict of interest – both authors were members of the Alcohol Health Alliance which is campaigning for MUP |
| Rush 1986 (34)                   | Analysis of routine data                                     | Affordability, not price                                                                                     |

|                                  |                                                      |                                                              |                                                                                                          |
|----------------------------------|------------------------------------------------------|--------------------------------------------------------------|----------------------------------------------------------------------------------------------------------|
|                                  | Shi 2011 (35)                                        | Econometric analysis of price and consumption data           | Price elasticities of demand only                                                                        |
|                                  | Skov 2011 (36)                                       | Natural experiment                                           | Tax, not price intervention                                                                              |
|                                  | Sloan 1994 (37)                                      | Analysis of routine data 1982-1988                           | Price changes, not minimum prices                                                                        |
|                                  | Stockwell 2012 (38)                                  | Letter to journal (not a research study)                     | Letter concerning homelessness and price paid for alcohol                                                |
|                                  | Stockwell 2013 (39)                                  | Letter to journal (not a research study)                     | Letter to editor about UK industry criticism of Canadian research on MUP, not a research study           |
|                                  | Sutton & Godfrey 1995 (40)                           | Cross-sectional survey                                       | Price changes, not minimum prices                                                                        |
|                                  | Tian 2011 (41)                                       | Econometric analysis of price and consumption data           | Price elasticities of demand only                                                                        |
|                                  | Wall & Casswell 2013 (42)                            | Time series analysis and econometric modelling               | Price changes, not minimum prices                                                                        |
|                                  | Xuan 2015 (43)                                       | Analysis of cross-sectional survey data and alcohol policies | Price and tax considered together                                                                        |
|                                  | Yashkin 2013 (44)                                    | Econometric analysis of price and consumption data           | Price elasticities of demand only                                                                        |
| Hand searching & grey literature | Ally 2014 (45)                                       | Analysis of VAT and price data                               | Tax, not price intervention                                                                              |
|                                  | Anderson 2009 (46)                                   | Lancet 'Series' article – a commentary/review                | Not an original research study.                                                                          |
|                                  | Byrnes 2013 (47)                                     | Repeated cross-sectional survey                              | Price changes, not minimum prices                                                                        |
|                                  | Centre for Economics and Business Research 2010 (48) | Report (not a research study)                                | Conflict of interest (funded by SAB Miller). Is a critique of Sheffield modelling, not a research study. |
|                                  | Craven 2013 (49)                                     | Economic report                                              | Published in the journal of the Institute of Economic Affairs, which has a conflict of interest.         |
|                                  | Duffy & Snowdon 2012 (50)                            | Report chapters (not a research study)                       | Is a critique of Sheffield modelling, not a research study.                                              |
|                                  | Fitzgerald & Angus 2015                              | Report (not a research study)                                | Is a report about use of evidence in policymaking, not                                                   |



|    |                                                    |                                                   |                                                                                                                            |
|----|----------------------------------------------------|---------------------------------------------------|----------------------------------------------------------------------------------------------------------------------------|
| 1  | (51)                                               |                                                   | about effectiveness of MUP. Also not a research study.                                                                     |
| 2  | Gallet 2007 (52)                                   | Meta-analysis                                     | Is looking at elasticities of demand for alcohol, not the effectiveness of MUP.                                            |
| 3  | Gray 2000 (53)                                     | Natural experiment                                | Restrictions do not include any price interventions                                                                        |
| 4  | Gruenewald 2006 (54)                               | Time series analysis/modelling                    | Price changes, not minimum prices, but included in narrative                                                               |
| 5  | Hilton 2014 (55)                                   | Content analysis of UK newsprint                  | Media representations of MUP, not effectiveness                                                                            |
| 6  | Home Office 2011 (56)                              | 'Summary review'/report (not a research study)    | Replicates what we have elsewhere, but in less detail. Also not a research study.                                          |
| 7  | Institute for Fiscal Studies 2011 (57)             | Report (not a research study)                     | Is not about effectiveness of MUP                                                                                          |
| 8  | Institute for Fiscal Studies 2013 (58)             | Report (not a research study)                     | Is not looking at effectiveness of MUP, is comparing Govt and industry revenue under MUP and higher tax                    |
| 9  | Institute of Alcohol Studies (Goodliffe) 2014 (59) | Webpage                                           | Is discussing legal issues, not effectiveness of MUP                                                                       |
| 10 | Kisely & Lawence 2015 (60)                         | Natural experiment                                | Tax, not price intervention                                                                                                |
| 11 | Ludbrook 2010 (61)                                 | Secondary analysis of Expenditure and Food Survey | Describes purchasing patterns of low price alcohol in Scotland. Not about MUP.                                             |
| 12 | Ornstein 1983 (62)                                 | Literature review book chapter (not systematic)   | Price elasticities of demand only                                                                                          |
| 13 | Rabinovch 2012 (63)                                | Technical report (contains data)                  | Does not assess effectiveness of MUP                                                                                       |
| 14 | Radaev 2015 (64)                                   | Time series analysis                              | Paper explored the effect of price interventions on consumption of homemade alcohol, not the effectiveness of MUP          |
| 15 | Robinson 2013 (65)                                 | Letter to journal (not a research study)          | Letter to editor about evidence for MUP, not a research study                                                              |
| 16 | Snowdon 2015 (66)                                  | Book chapter                                      | Is a critique of Sheffield modelling, not a research study. Institute of Economic Affairs also has a conflict of interest. |

|  |                                              |               |                                                                |
|--|----------------------------------------------|---------------|----------------------------------------------------------------|
|  | Wine and Spirits Trade Association n.d. (67) | Press release | Press release critiquing Zhao 2013 paper, not a research study |
|  | World Health Organisation 2014 (68)          | Report        | Does not discuss effectiveness of MUP                          |

For peer review only

## References

1. Aage H. Alcohol in Greenland 1951–2010: consumption, mortality, prices. *Int J Circumpolar Health* [Internet]. 2012 Dec 17 [cited 2016 Feb 27];71. Available from: <http://www.ncbi.nlm.nih.gov/pmc/articles/PMC3525923/>
2. Ayyagari P, Deb P, Fletcher J, Gallo W, Sindelar JL. Understanding heterogeneity in price elasticities in the demand for alcohol for older individuals. *Health Econ*. 2013 Jan;22(1):89–105.
3. Bellis MA, Phillips-Howard PA, Hughes K, Hughes S, Cook PA, Morleo M, et al. Teenage drinking, alcohol availability and pricing: a cross-sectional study of risk and protective factors for alcohol-related harms in school children. *BMC Public Health*. 2009 Oct 9;9(1):1–12.
4. Bennetts R, Russell Bennetts. Alcohol: Price, Policy and Public Health. *Alcohol Alcohol*. 2008 Mar 1;43(2):123–123.
5. Callinan S, Room R, Dietze P. Alcohol Price Policies as an Instrument of Health Equity: Differential Effects of Tax and Minimum Price Measures. *Alcohol Alcohol Oxf Oxfs*. 2015 Nov;50(6):629–30.
6. Chalmers J, Carragher N, Davoren S, O'Brien P. Real or perceived impediments to minimum pricing of alcohol in Australia: Public opinion, the industry and the law. *Int J Drug Policy*. 2013 Nov;24(6):517–23.
7. Chaloupka FJ, Grossman M, Saffer H. The effects of price on alcohol consumption and alcohol-related problems. *Alcohol Res Health J Natl Inst Alcohol Abuse Alcohol*. 2002;26(1):22–34.
8. Chick J. 16 for the Price of 10: Effects of a Ban on Multi-Buy Alcohol. *Alcohol Alcohol*. 2012 Feb 22;47(2):83–83.
9. Cook WK, Bond J, Greenfield TK. Are alcohol policies associated with alcohol consumption in low- and middle-income countries? *Addict Abingdon Engl*. 2014 Jul;109(7):1081–90.
10. Duffy M. The influence of prices, consumer incomes and advertising upon the demand for alcoholic drink in the United Kingdom: an econometric study. *Alcohol Alcohol*. 1981 Sep 21;16(4):200–9.
11. Giesbrecht N, Greenfield TK. Preventing Alcohol-Related Problems in the US Through Policy: Media Campaigns, Regulatory Approaches and Environmental Interventions. *J Prim Prev*. 2003 Sep;24(1):63–104.
12. Giesbrecht N, Wettlaufer A, Thomas G, Stockwell T, Thompson K, April N, et al. Pricing of alcohol in Canada: A comparison of provincial policies and harm-reduction opportunities. *Drug Alcohol Rev*. 2015 Nov 4;
13. Gilligan C, Kuntsche E, Gmel G. Adolescent drinking patterns across countries: associations with alcohol policies. *Alcohol Alcohol Oxf Oxfs*. 2012 Dec;47(6):732–7.

- 1  
2  
3  
4  
5  
6  
7  
8  
9  
10  
11  
12  
13  
14  
15  
16  
17  
18  
19  
20  
21  
22  
23  
24  
25  
26  
27  
28  
29  
30  
31  
32  
33  
34  
35  
36  
37  
38  
39  
40  
41  
42  
43  
44  
45  
46  
47  
48  
49  
50  
51  
52  
53  
54  
55  
56  
57  
58  
59  
60
14. Grossman M. Individual Behaviors and Substance Use: The Role of Price [Internet]. National Bureau of Economic Research; 2004 Dec [cited 2016 Feb 27]. Report No.: 10948. Available from: <http://www.nber.org/papers/w10948>
  15. Hadland SE, Xuan Z, Blanchette JG, Heeren TC, Swahn MH, Naimi TS. Alcohol Policies and Alcoholic Cirrhosis Mortality in the United States. *Prev Chronic Dis* [Internet]. 2015 Oct 15 [cited 2016 Feb 27];12. Available from: [http://www.cdc.gov/pcd/issues/2015/15\\_0200.htm](http://www.cdc.gov/pcd/issues/2015/15_0200.htm)
  16. Heeb J-L, Gmel G, Zurbrügg C, Kuo M, Rehm J. Changes in alcohol consumption following a reduction in the price of spirits: a natural experiment in Switzerland. *Addict Abingdon Engl*. 2003 Oct;98(10):1433–46.
  17. Hogan E, BOFFA J, ROSEWARNE C, BELL S, CHEE DA. What price do we pay to prevent alcohol-related harms in Aboriginal communities? The Alice Springs trial of liquor licensing restrictions. *Drug Alcohol Rev*. 2006;25(3):207–212.
  18. Jónsson RM, Kristjánsson S. Alcohol policy and public opinion in Iceland, 1989–2012. *Nord Stud Alcohol Drugs*. 2013;30(6):539–549.
  19. Katikireddi SV, McLean JA. Introducing a minimum unit price for alcohol in Scotland: considerations under European Law and the implications for European public health. *Eur J Public Health*. 2012 Aug 1;22(4):457–8.
  20. Katikireddi SV, Bond L, Hilton S. Perspectives on econometric modelling to inform policy: a UK qualitative case study of minimum unit pricing of alcohol. *Eur J Public Health*. 2014 Jun 1;24(3):490–5.
  21. Khaltourina D, Korotayev A. Effects of Specific Alcohol Control Policy Measures on Alcohol-Related Mortality in Russia from 1998 to 2013. *Alcohol Alcohol*. 2015 Sep 1;50(5):588–601.
  22. Knibbe RA, Derickx M, Allamani A, Massini G. Alcohol Consumption and its Related Harms in the Netherlands Since 1960: Relationships With Planned and Unplanned Factors. *Subst Use Misuse*. 2014 Oct 15;49(12):1589–600.
  23. Lindeman M, Karlsson T, Österberg E. Public opinions, alcohol consumption and policy changes in Finland, 1993–2013. *Nord Stud Alcohol Drugs*. 2013;30(6):507–524.
  24. Lonsdale AJ, Hardcastle SJ, Hagger MS. A minimum price per unit of alcohol: A focus group study to investigate public opinion concerning UK government proposals to introduce new price controls to curb alcohol consumption. *BMC Public Health*. 2012 Nov 23;12(1):1023.
  25. Mäkelä P, Osterberg E. Weakening of one more alcohol control pillar: a review of the effects of the alcohol tax cuts in Finland in 2004. *Addict Abingdon Engl*. 2009 Apr;104(4):554–63.
  26. McCambridge J, Hawkins B, Holden C. Vested Interests in Addiction Research and Policy. The challenge corporate lobbying poses to reducing society's alcohol problems: insights from UK evidence on minimum unit pricing. *Addiction*. 2014 Feb 1;109(2):199–205.

- 1  
2  
3  
4  
5  
6  
7  
8  
9  
10  
11  
12  
13  
14  
15  
16  
17  
18  
19  
20  
21  
22  
23  
24  
25  
26  
27  
28  
29  
30  
31  
32  
33  
34  
35  
36  
37  
38  
39  
40  
41  
42  
43  
44  
45  
46  
47  
48  
49  
50  
51  
52  
53  
54  
55  
56  
57  
58  
59  
60
27. Meng Y, Brennan A, Purshouse R, Hill-McManus D, Angus C, Holmes J, et al. Estimation of own and cross price elasticities of alcohol demand in the UK--A pseudo-panel approach using the Living Costs and Food Survey 2001-2009. *J Health Econ*. 2014 Mar;34:96-103.
  28. Nelson JP. Does Heavy Drinking by Adults Respond to Higher Alcohol Prices and Taxes? A Survey and Assessment. *Econ Anal Policy*. 2013 Dec;43(3):265-91.
  29. Nelson JP. Alcohol Affordability and Alcohol Demand: Cross-Country Trends and Panel Data Estimates, 1975 to 2008. *Alcohol Clin Exp Res*. 2014 Apr 1;38(4):1167-75.
  30. Nelson JP. Estimating the Price Elasticity of Beer: Meta-Analysis of Data with Heterogeneity, Dependence, and Publication Bias [Internet]. Rochester, NY: Social Science Research Network; 2013 Jan [cited 2016 Feb 27]. Report No.: ID 2200492. Available from: <http://papers.ssrn.com/abstract=2200492>
  31. Nelson JP. Gender differences in alcohol demand: a systematic review of the role of prices and taxes. *Health Econ*. 2014 Oct;23(10):1260-80.
  32. Nicholls J, Greenaway J. What is the problem?: Evidence, politics and alcohol policy in England and Wales, 2010-2014. *Drugs Educ Prev Policy*. 2015 Mar 4;22(2):135-42.
  33. Record C, Day C. Britain's alcohol market: how minimum alcohol prices could stop moderate drinkers subsidising those drinking at hazardous and harmful levels. *Clin Med*. 2009 Oct 1;9(5):421-5.
  34. Rush B, Steinberg M, Brook R. The relationships among alcohol availability, alcohol consumption and alcohol-related damage in the Province of Ontario and the State of Michigan 1955-1982. *Adv Alcohol Subst Abuse*. 1986;5(4):33-45.
  35. Shi Y. Three Essays on Economics of Health Behavior in China [Internet]. 2011 [cited 2016 Mar 20]. Available from: [http://www.rand.org/pubs/rgs\\_dissertations/RGSD287.html](http://www.rand.org/pubs/rgs_dissertations/RGSD287.html)
  36. Skov SJ, Chikritzhs TN, Kypri K, Miller PG, Hall WD, Daube MM, et al. Is the "alcopops" tax working? Probably yes but there is a bigger picture. *Med J Aust* [Internet]. 2011 [cited 2015 Nov 9];195(2). Available from: <https://www.mja.com.au/journal/2011/195/2/alcopops-tax-working-probably-yes-there-bigger-picture>
  37. Sloan FA, Reilly BA, Schenzler C. Effects of prices, civil and criminal sanctions, and law enforcement on alcohol-related mortality. *J Stud Alcohol*. 1994 Jul;55(4):454-65.
  38. Stockwell T, Williams N, Pauly B. Working and waiting: Homeless drinkers responses to less affordable alcohol. *Drug Alcohol Rev*. 2012 Sep 1;31(6):823-4.
  39. Stockwell T, Zhao J, Martin G, Macdonald S, Vallance K, Treno A, et al. Misleading UK alcohol industry criticism of Canadian research on minimum pricing. *Addiction*. 2013 Jun 1;108(6):1172-3.
  40. Sutton M, Godfrey C. A grouped data regression approach to estimating economic and social influences on individual drinking behaviour. *Health Econ*. 1995 May 1;4(3):237-47.

- 1  
2  
3  
4  
5  
6  
7  
8  
9  
10  
11  
12  
13  
14  
15  
16  
17  
18  
19  
20  
21  
22  
23  
24  
25  
26  
27  
28  
29  
30  
31  
32  
33  
34  
35  
36  
37  
38  
39  
40  
41  
42  
43  
44  
45  
46  
47  
48  
49  
50  
51  
52  
53  
54  
55  
56  
57  
58  
59  
60
41. Tian G, Liu F. Is the demand for alcoholic beverages in developing countries sensitive to price? Evidence from China. *Int J Environ Res Public Health*. 2011 Jun;8(6):2124–31.
  42. Wall M, Casswell S. Affordability of alcohol as a key driver of alcohol demand in New Zealand: a co-integration analysis. *Addict Abingdon Engl*. 2013 Jan;108(1):72–9.
  43. Xuan Z, Blanchette J, Nelson TF, Heeren T, Oussayef N, Naimi TS. The alcohol policy environment and policy subgroups as predictors of binge drinking measures among US adults. *Am J Public Health*. 2015 Apr;105(4):816–22.
  44. Yashkin A. The Dynamics of Alcohol Consumption in the Russian Federation: Implications of Using Price Related Policies to Control Alcohol Use. *Grad Theses Diss [Internet]*. 2013 Jan 1; Available from: <http://scholarcommons.usf.edu/etd/4968>
  45. Ally AK, Meng Y, Chakraborty R, Dobson PW, Seaton JS, Holmes J, et al. Alcohol tax pass-through across the product and price range: do retailers treat cheap alcohol differently? *Addiction*. 2014 Dec 1;109(12):1994–2002.
  46. Anderson P, Chisholm D, Fuhr DC. Effectiveness and cost-effectiveness of policies and programmes to reduce the harm caused by alcohol. *Lancet Lond Engl*. 2009 Jun 27;373(9682):2234–46.
  47. Byrnes J, Shakeshaft A, Petrie D, Doran C. Can harms associated with high-intensity drinking be reduced by increasing the price of alcohol? *Drug Alcohol Rev*. 2013 Jan;32(1):27–30.
  48. Centre for Economics and Business Research. Minimum Alcohol Pricing: A targeted measure? Report to the Scottish Parliamentary Health and Sport Committee [Internet]. London; 2010 Aug. Available from: <http://www.ias.org.uk/uploads/pdf/Price%20docs/Updated-Sheffield-Scotland-v2-August-20103.pdf>
  49. Craven BM, Marlow ML, Shiers AF. The Economics of Minimum Pricing for Alcohol. *Econ Aff*. 2013 Jun 1;33(2):174–89.
  50. Duffy J, Snowdon C. The minimal evidence for minimum pricing [Internet]. Adam Smith Institute; Available from: [http://www.adamsmith.org/sites/default/files/research/files/ASI\\_SAPM.pdf](http://www.adamsmith.org/sites/default/files/research/files/ASI_SAPM.pdf)
  51. Fitzgerald N, Angus C. Four Nations: How Evidence-based are Alcohol Policies and Programmes across the UK?. London: [Internet]. London: Alliance for Useful Evidence/Alcohol Health Alliance.; 2015. Available from: <http://www.alliance4usefulevidence.org/assets/Four-Nations-v3.pdf>
  52. Gallet CA. The Demand for Alcohol: A Meta-Analysis of Elasticities [Internet]. Rochester, NY: Social Science Research Network; 2007 May [cited 2016 Jan 6]. Report No.: ID 985689. Available from: <http://papers.ssrn.com/abstract=985689>
  53. Gray D, Siggers S, Atkinson D, Sputore B, Bourbon D. Beating the grog: an evaluation of the Tennant Creek liquor licensing restrictions. *Aust N Z J Public Health*. 2000 Feb;24(1):39–44.



- 1  
2  
3  
4  
5  
6  
7  
8  
9  
10  
11  
12  
13  
14  
15  
16  
17  
18  
19  
20  
21  
22  
23  
24  
25  
26  
27  
28  
29  
30  
31  
32  
33  
34  
35  
36  
37  
38  
39  
40  
41  
42  
43  
44  
45  
46  
47  
48  
49  
50  
51  
52  
53  
54  
55  
56  
57  
58  
59  
60
54. Gruenewald PJ, Ponicki WR, Holder HD, Romelsjö A. Alcohol prices, beverage quality, and the demand for alcohol: quality substitutions and price elasticities. *Alcohol Clin Exp Res*. 2006 Jan;30(1):96–105.
55. Hilton S, Wood K, Patterson C, Katikireddi SV. Implications for alcohol minimum unit pricing advocacy: What can we learn for public health from UK newsprint coverage of key claim-makers in the policy debate? *Soc Sci Med*. 2014 Feb;102:157–64.
56. Home Office. The likely impacts of increasing alcohol price: a summary review of the evidence base [Internet]. 2011 Jan. Available from: [https://www.gov.uk/government/uploads/system/uploads/attachment\\_data/file/98100/impacts-alcohol-price-review.pdf](https://www.gov.uk/government/uploads/system/uploads/attachment_data/file/98100/impacts-alcohol-price-review.pdf)
57. Institute for Fiscal Studies. Alcohol pricing and taxation policies. IFS Briefing Note BN124. 2011.
58. Institute for Fiscal Studies. Price-based measures to reduce alcohol consumption. IFS Briefing Note BN138. 2013.
59. Goodliffe J. Applying a minimum price to alcohol (Institute of Alcohol Studies) [Internet]. 2014. Available from: <http://www.ias.org.uk/What-we-do/Publication-archive/Alcohol-Alert/October-2014/Applying-a-minimum-price-to-alcohol.aspx>
60. Kisely S, Lawrence D. A time series analysis of alcohol-related presentations to emergency departments in Queensland following the increase in alcopops tax. *J Epidemiol Community Health*. 2015 Sep 16;jech-2015-205666.
61. Ludbrook A. Purchasing Patterns for Low Price Off Sales Alcohol: Evidence from the Expenditure and Food Survey [Internet]. Available from: <http://www.shaap.org.uk/images/UserFiles/File/Reports%20and%20Briefings/Briefing%20-%20Purchase%20of%20low-price%20alcohol%20analysis.pdf>
62. Ornstein SI, Levy D. Price and Income Elasticities of Demand for Alcoholic Beverages. In: Galanter M, Begleiter H, Cicero T, Deitrich R, Goodwin DW, Gottheil E, et al., editors. *Genetics Behavioral Treatment Social Mediators and Prevention Current Concepts in Diagnosis* [Internet]. Boston, MA: Springer US; 1983. p. 303–45. Available from: [http://dx.doi.org/10.1007/978-1-4613-3617-4\\_18](http://dx.doi.org/10.1007/978-1-4613-3617-4_18)
63. Rabinovich L, Brutscher P-B, de Vries H, Tiessen J, Clift J, Reding A. The affordability of alcoholic beverages in the European Union. 2012;
64. Radaev V. Impact of a New Alcohol Policy on Homemade Alcohol Consumption and Sales in Russia. *Alcohol Alcohol*. 2015 May 1;50(3):365–72.
65. Robinson M, McCartney G, Beeston C. What is convincing evidence on alcohol pricing? *BMJ*. 2013 Aug 20;347:f5102.
66. Snowdon C. Chapter 10. Minimum unit pricing. In: *Flaws and Ceilings: Price controls and the damage they cause* [Internet]. [cited 2015 Nov 9]. p. 177–97. Available from: Online supplementary file to Boniface S, Scannell JW, Marlow S: *Evidence for the effectiveness of minimum pricing of alcohol: a systematic review and assessment using the Bradford Hill criteria for causality*

1  
2  
3 [http://www.iea.org.uk/publications/research/flaws-and-ceilings-price-controls-and-the-damage-](http://www.iea.org.uk/publications/research/flaws-and-ceilings-price-controls-and-the-damage-they-cause)  
4 they-cause  
5  
6

7 67. Wine and Spirits Trade Association. New claims that increasing the cost of alcohol saves lives  
8 are misleading [Internet]. Available from: [http://www.wsta.co.uk/press/634-new-claims-that-](http://www.wsta.co.uk/press/634-new-claims-that-increasing-the-cost-of-alcohol-saves-lives-are-misleading)  
9 increasing-the-cost-of-alcohol-saves-lives-are-misleading  
10

11 68. World Health Organization. European status report on alcohol and health 2014. Pricing  
12 policies [Internet]. World Health Organization; 2014. Available from:  
13 [http://www.euro.who.int/\\_\\_data/assets/pdf\\_file/0003/244902/Pricing-policies.pdf](http://www.euro.who.int/__data/assets/pdf_file/0003/244902/Pricing-policies.pdf)  
14  
15  
16  
17  
18  
19  
20  
21  
22  
23  
24  
25  
26  
27  
28  
29  
30  
31  
32  
33  
34  
35  
36  
37  
38  
39  
40  
41  
42  
43  
44  
45  
46  
47  
48  
49  
50  
51  
52  
53  
54  
55  
56  
57  
58  
59  
60



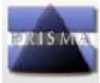

# PRISMA 2009 Checklist

| Section/topic                      | #  | Checklist item                                                                                                                                                                                                                                                                                              | Reported on page #                                |
|------------------------------------|----|-------------------------------------------------------------------------------------------------------------------------------------------------------------------------------------------------------------------------------------------------------------------------------------------------------------|---------------------------------------------------|
| <b>TITLE</b>                       |    |                                                                                                                                                                                                                                                                                                             |                                                   |
| Title                              | 1  | Identify the report as a systematic review, meta-analysis, or both.                                                                                                                                                                                                                                         | 1                                                 |
| <b>ABSTRACT</b>                    |    |                                                                                                                                                                                                                                                                                                             |                                                   |
| Structured summary                 | 2  | Provide a structured summary including, as applicable: background; objectives; data sources; study eligibility criteria, participants, and interventions; study appraisal and synthesis methods; results; limitations; conclusions and implications of key findings; systematic review registration number. | 2                                                 |
| <b>INTRODUCTION</b>                |    |                                                                                                                                                                                                                                                                                                             |                                                   |
| Rationale                          | 3  | Describe the rationale for the review in the context of what is already known.                                                                                                                                                                                                                              | 3                                                 |
| Objectives                         | 4  | Provide an explicit statement of questions being addressed with reference to participants, interventions, comparisons, outcomes, and study design (PICOS).                                                                                                                                                  | 3-4                                               |
| <b>METHODS</b>                     |    |                                                                                                                                                                                                                                                                                                             |                                                   |
| Protocol and registration          | 5  | Indicate if a review protocol exists, if and where it can be accessed (e.g., Web address), and, if available, provide registration information including registration number.                                                                                                                               | no published protocol                             |
| Eligibility criteria               | 6  | Specify study characteristics (e.g., PICOS, length of follow-up) and report characteristics (e.g., years considered, language, publication status) used as criteria for eligibility, giving rationale.                                                                                                      | 3-4                                               |
| Information sources                | 7  | Describe all information sources (e.g., databases with dates of coverage, contact with study authors to identify additional studies) in the search and date last searched.                                                                                                                                  | 3                                                 |
| Search                             | 8  | Present full electronic search strategy for at least one database, including any limits used, such that it could be repeated.                                                                                                                                                                               | 3                                                 |
| Study selection                    | 9  | State the process for selecting studies (i.e., screening, eligibility, included in systematic review, and, if applicable, included in the meta-analysis).                                                                                                                                                   | 3-4                                               |
| Data collection process            | 10 | Describe method of data extraction from reports (e.g., piloted forms, independently, in duplicate) and any processes for obtaining and confirming data from investigators.                                                                                                                                  | 4                                                 |
| Data items                         | 11 | List and define all variables for which data were sought (e.g., PICOS, funding sources) and any assumptions and simplifications made.                                                                                                                                                                       | Tables 2+3                                        |
| Risk of bias in individual studies | 12 | Describe methods used for assessing risk of bias of individual studies (including specification of whether this was done at the study or outcome level), and how this information is to be used in any data synthesis.                                                                                      | 4                                                 |
| Summary measures                   | 13 | State the principal summary measures (e.g., risk ratio, difference in means).                                                                                                                                                                                                                               | Not stated, as all summary measures were included |
| Synthesis of results               | 14 | Describe the methods of handling data and combining results of studies, if done, including measures of consistency (e.g., $I^2$ ) for each meta-analysis.                                                                                                                                                   | 4, and Table 1                                    |



# PRISMA 2009 Checklist

| Section/topic                 | #  | Checklist item                                                                                                                                                                                           | Reported on page #                     |
|-------------------------------|----|----------------------------------------------------------------------------------------------------------------------------------------------------------------------------------------------------------|----------------------------------------|
| Risk of bias across studies   | 15 | Specify any assessment of risk of bias that may affect the cumulative evidence (e.g., publication bias, selective reporting within studies).                                                             | 4                                      |
| Additional analyses           | 16 | Describe methods of additional analyses (e.g., sensitivity or subgroup analyses, meta-regression), if done, indicating which were pre-specified.                                                         | 4                                      |
| <b>RESULTS</b>                |    |                                                                                                                                                                                                          |                                        |
| Study selection               | 17 | Give numbers of studies screened, assessed for eligibility, and included in the review, with reasons for exclusions at each stage, ideally with a flow diagram.                                          | Figure 1 and online supplementary file |
| Study characteristics         | 18 | For each study, present characteristics for which data were extracted (e.g., study size, PICOS, follow-up period) and provide the citations.                                                             | Tables 2+3                             |
| Risk of bias within studies   | 19 | Present data on risk of bias of each study and, if available, any outcome level assessment (see item 12).                                                                                                | Tables 2+3                             |
| Results of individual studies | 20 | For all outcomes considered (benefits or harms), present, for each study: (a) simple summary data for each intervention group (b) effect estimates and confidence intervals, ideally with a forest plot. | Tables 2+3, p18-20                     |
| Synthesis of results          | 21 | Present results of each meta-analysis done, including confidence intervals and measures of consistency.                                                                                                  | No meta-analysis, discussed p18-20     |
| Risk of bias across studies   | 22 | Present results of any assessment of risk of bias across studies (see Item 15).                                                                                                                          | discussed p21                          |
| Additional analysis           | 23 | Give results of additional analyses, if done (e.g., sensitivity or subgroup analyses, meta-regression [see Item 16]).                                                                                    | 18-20                                  |
| <b>DISCUSSION</b>             |    |                                                                                                                                                                                                          |                                        |
| Summary of evidence           | 24 | Summarize the main findings including the strength of evidence for each main outcome; consider their relevance to key groups (e.g., healthcare providers, users, and policy makers).                     | 20-21                                  |
| Limitations                   | 25 | Discuss limitations at study and outcome level (e.g., risk of bias), and at review-level (e.g., incomplete retrieval of identified research, reporting bias).                                            | 20-21                                  |
| Conclusions                   | 26 | Provide a general interpretation of the results in the context of other evidence, and implications for future research.                                                                                  | 20                                     |
| <b>FUNDING</b>                |    |                                                                                                                                                                                                          |                                        |
| Funding                       | 27 | Describe sources of funding for the systematic review and other support (e.g., supply of data); role of funders for the systematic review.                                                               | 22                                     |

From: Moher D, Liberati A, Tetzlaff J, Altman DG, The PRISMA Group (2009). Preferred Reporting Items for Systematic Reviews and Meta-Analyses: The PRISMA Statement. PLoS Med 6(7): e1000097. doi:10.1371/journal.pmed1000097

For more information, visit: [www.prisma-statement.org](http://www.prisma-statement.org).

# BMJ Open

## Evidence for the effectiveness of minimum pricing of alcohol: a systematic review and assessment using the Bradford Hill criteria for causality

|                                 |                                                                                                                                                                                                                                                                                                                                                         |
|---------------------------------|---------------------------------------------------------------------------------------------------------------------------------------------------------------------------------------------------------------------------------------------------------------------------------------------------------------------------------------------------------|
| Journal:                        | <i>BMJ Open</i>                                                                                                                                                                                                                                                                                                                                         |
| Manuscript ID                   | bmjopen-2016-013497.R2                                                                                                                                                                                                                                                                                                                                  |
| Article Type:                   | Research                                                                                                                                                                                                                                                                                                                                                |
| Date Submitted by the Author:   | 28-Feb-2017                                                                                                                                                                                                                                                                                                                                             |
| Complete List of Authors:       | Boniface, Sadie; King's College London, National Addiction Centre, Institute of Psychiatry, Psychology and Neuroscience<br>Scannell, Jack; University of Edinburgh, Innogen Institute, School of Social and Political Sciences<br>Marlow, Sally; King's College London, National Addiction Centre, Institute of Psychiatry, Psychology and Neuroscience |
| <b>Primary Subject Heading</b>: | Public health                                                                                                                                                                                                                                                                                                                                           |
| Secondary Subject Heading:      | Addiction                                                                                                                                                                                                                                                                                                                                               |
| Keywords:                       | alcohol, policy, minimum unit pricing, PUBLIC HEALTH, Bradford Hill                                                                                                                                                                                                                                                                                     |
|                                 |                                                                                                                                                                                                                                                                                                                                                         |

SCHOLARONE™  
Manuscripts

## Evidence for the effectiveness of minimum pricing of alcohol: a systematic review and assessment using the Bradford Hill criteria for causality

Sadie Boniface,<sup>1</sup> Jack W Scannell,<sup>2</sup> Sally Marlow<sup>1</sup>

<sup>1</sup>National Addiction Centre, Institute of Psychiatry, Psychology and Neuroscience, King's College London, London, UK

<sup>2</sup>School of Social and Political Science, University of Edinburgh, Edinburgh, UK

Corresponding author: Dr Sadie Boniface, National Addiction Centre, Addiction Sciences Building (PO 48) Institute of Psychiatry, Psychology and Neuroscience, 16 De Crespigny Park, King's College London, SE5 8AF. [sadie.boniface@kcl.ac.uk](mailto:sadie.boniface@kcl.ac.uk) 020 7848 5097

Keywords: alcohol, policy, minimum unit pricing, public health, Bradford Hill

Word count: 3,432 (excluding title page, abstract, references, figures and tables)

## ABSTRACT

**Objectives:** To assess the evidence for price-based alcohol policy interventions to determine whether minimum unit pricing is likely to be effective.

**Design:** Systematic review and assessment of studies according to PRISMA guidelines, against the Bradford Hill criteria for causality. Three electronic databases were searched from inception to February 2017. Additional articles were found through hand searching and grey literature searches.

**Criteria for selecting studies:** We included any study design that reported on the effect of price-based interventions on alcohol consumption or alcohol-related morbidity, mortality, and wider harms. Studies reporting on the effects of taxation or affordability, and studies that only investigated price elasticity of demand were beyond the scope of this review. Studies with any conflict of interest were excluded. All studies were appraised for methodological quality.

**Results:** Of 517 studies assessed, 33 studies were included: 26 peer-reviewed research studies and 7 from the grey literature. All nine of the Bradford Hill criteria were met, although different types of study satisfied different criteria. For example, modelling studies complied with the consistency and specificity criteria, time series analyses demonstrated the temporality and experiment criteria, and the analogy criterion was fulfilled by comparing the findings with the wider literature on taxation and affordability.

**Conclusions:** Overall, the Bradford-Hill criteria for causality were satisfied. There was very little evidence that minimum alcohol prices are not associated with consumption or subsequent harms. However the overall quality of the evidence was variable, a large proportion of the evidence base has been produced by a small number of research teams, and the quantitative uncertainty in many estimates or forecasts is poorly communicated in the literature. None the less, price-based alcohol policy interventions such as minimum unit pricing are likely to reduce alcohol consumption, alcohol-related morbidity and mortality.

## ARTICLE SUMMARY

### Strengths and limitations of this study

- This review adds to an emerging literature of systematic reviews synthesising findings using the Bradford Hill criteria for causality in research areas where traditional meta-analyses of randomised controlled trials are not possible or appropriate
- A range of study designs were included, allowing for a comprehensive review of a disparate evidence base to investigate whether minimum unit pricing of alcohol is likely to reduce alcohol consumption and alcohol-related harm
- Studies examining the effects of alcohol taxation or changes in alcohol affordability, or studies solely reporting on price elasticity of demand, were not included
- Methodological quality of studies was variable

## INTRODUCTION

There are many policies and programmes that aim to reduce harms from alcohol (1). One of these is minimum alcohol pricing, which exists in a number of countries around the world. The most notable example of this is Canada, where there are government monopolies on alcohol sales and a variety of types of minimum pricing in operation. For example there is a minimum price per litre of a particular drink in British Columbia (2) and a (higher) minimum price linked to drink type and strength in Saskatchewan (3). Other countries with minimum alcohol pricing include Belarus, Kyrgyzstan, the Republic of Moldova, the Russian Federation and Ukraine (4). Minimum alcohol pricing is being considered by governments in the Republic of Ireland (5) and has also been reviewed in Australia (6) and New Zealand (7).

The situation with regards to minimum alcohol pricing in the United Kingdom is complex. In England and Wales there has been a ban on alcohol being sold at below cost (the total amount of 'duty plus VAT') since May 2014 (8); and the first conviction for selling alcohol below this level took place in 2016 (9). Duty plus VAT is equivalent to a 70cl bottle of vodka (37.5% ABV) costing a minimum of £8.72 (10), whereas under a minimum price of 50 pence per unit (one UK unit = 10ml or 8g ethanol) this would cost £13.13. In 2012 the UK coalition Government cited support for minimum unit pricing (MUP) in its alcohol strategy (11), and legislation to have a minimum price of £0.50 per unit was passed in Scotland the same year (4). Following the change to a Conservative majority Government in 2015, it is unclear whether there is still central Government support for MUP. In Scotland, the Scotch Whisky Association challenged the 2012 legislation in the Scottish Court of Session, which referred the case to the Court of Justice of the European Union (CJEU) in 2014 (12). In late 2015, the CJEU referred the case back to the Scottish courts to investigate proportionality (that the same objective cannot be met through increased taxation) (13), which could have implications for other EU countries considering MUP. In late 2016, the Scottish Court of Session ruled that MUP does not contravene EU law (14), however the Scotch Whisky Association then appealed to the UK Supreme Court (15).

In light of this ongoing consideration of MUP in the United Kingdom, in this paper we assess the effectiveness of minimum alcohol price interventions to reduce alcohol-related harm. Alcohol-related harm costs the NHS in England £3.5bn each year and the estimated cost to society is £21 billion per year (16). The latest annual figures for England (population of 54 million) show over one million alcohol-related hospital admissions (2013/14) and six and a half thousand alcohol-related deaths (2013); and these figures represent increases compared with a decade previously of 115% and 10% respectively (16).

We systematically review the literature on the effect of price interventions or policies such as MUP on alcohol consumption, alcohol-related morbidity and mortality, and wider harms. We use the nine Bradford Hill criteria for causality as a framework with the aim of assessing the likely effectiveness of MUP as a policy to reduce alcohol consumption and alcohol-related harm.

## METHODS

A systematic literature search was performed according to Preferred Reporting Items for Systematic Reviews and Meta-Analyses (PRISMA) guidance (see Figure 1 for PRISMA flow diagram and online supplementary file for excluded studies).

1  
2  
3 [figure 1 to go here]  
4

### 5 **Identification of studies**

6  
7 Three electronic databases were searched for titles or abstracts containing "minimum unit price"  
8 OR "minimum price" OR "floor price" OR "price AND policy" AND alcohol. The databases were  
9 PsycINFO (1806 to February Week 2 2017), Embase (1974 to 2017 Week 07), Ovid Medline (1946 to  
10 February Week 2 2017). We also searched the websites of five alcohol charities for publications or  
11 reports related to "price", and also searched 20 leading UK think tanks for "alcohol" or "addiction".  
12  
13

14 Inclusion criteria were: any study design; population level studies exploring at least one aspect of the  
15 effect of interventions or policies leading to changes in the minimum price of alcohol, including but  
16 not limited to changes in alcohol sales, consumption, morbidity and mortality; individual level  
17 studies exploring minimum alcohol prices, and alcohol purchasing, consumption, morbidity and  
18 mortality; written in English.  
19  
20

21 Exclusion criteria were: studies about taxation, affordability, price elasticity of demand for alcohol,  
22 and general changes in alcohol price not the result of an intervention or policy (there is a large  
23 literature on each of these already and reviewing all of these studies was beyond the scope of this  
24 review); studies about public perceptions of MUP; studies where a conflict of interest was reported  
25 in the paper, whether this was in favour of or against MUP.  
26  
27

28 All 33 studies that met the inclusion criteria were assessed against the Bradford Hill criteria for  
29 causality and the methodological quality appraised. These included 26 original research studies and  
30 7 studies from the grey literature, and in addition two systematic reviews pertinent to the analogy  
31 criterion were included. Of the 26 research studies, there were 9 cross sectional surveys, 8 time  
32 series analyses or similar, 7 modelling studies, one qualitative study, and one trial.  
33  
34

### 35 **Analysis of included studies**

36  
37 Quality of included studies was assessed independently by two reviewers and using validated tools.  
38 Due to the wide variation in study designs among the included studies, the Effective Public Health  
39 Practice Project's (EPHPP) tool was used for assessing all quantitative studies, as recommended by  
40 the Cochrane Handbook for assessing studies in public health (17). Qualitative studies (n=1) and  
41 systematic reviews (n=2) included in this review were not covered by the EPHPP tool and so were  
42 assessed using the Critical Appraisal Skills Programme (CASP) tools specific to these study designs.  
43  
44

45 Nine criteria in order to determine causality were suggested by Bradford Hill in an influential 1965  
46 paper (18). Increasingly, the Bradford Hill criteria are a standard framework to assess the impact of  
47 interventions where it is not ethical or practical to conduct randomised controlled trials. Our  
48 interpretation of the Bradford Hill criteria for the purpose of this review is listed in Table 1. Two  
49 reviewers assessed each study against each of the nine criteria and agreed which studies provided  
50 relevant evidence for or against each criterion.  
51  
52  
53  
54  
55  
56  
57  
58  
59  
60

Table 1: Bradford Hill criteria for assessing causation and the definitions used in this review

| Criterion                      | Bradford Hill criteria (1965)                                                                                                                                                                                                                                                         | Application in this review                                                                                                                                                                                                                                                                  |
|--------------------------------|---------------------------------------------------------------------------------------------------------------------------------------------------------------------------------------------------------------------------------------------------------------------------------------|---------------------------------------------------------------------------------------------------------------------------------------------------------------------------------------------------------------------------------------------------------------------------------------------|
| 1. Strength of the association | The strength of a supposed association between an intervention and an outcome is determined by the appropriate statistic used to measure the protective effect of an intervention (e.g. relative risk or odds ratio). This is the most important factor determining causation         | A statistically significant change ( $P < 0.05$ ) in alcohol consumption or alcohol related harms, in the expected direction. The exact magnitude of the association was assessed on a study by study basis                                                                                 |
| 2. Consistency                 | Has it been repeatedly observed by different persons, in different places, circumstances and times?                                                                                                                                                                                   | Whether different studies conducted in different locations, in different populations, by different investigators and at different times have reported similar findings                                                                                                                      |
| 3. Specificity                 | Specificity is present when the intervention is exclusive to the outcome and when the outcome has no other known cause or associated risk factors; cautions that this criterion should not be overemphasized and that if specificity is not apparent this does not preclude causation | If pricing was the only reason that alcohol consumption or alcohol-related harm could have fallen, this adds to the argument for causality. However if a price intervention was one of a number of alcohol policy interventions, then this criterion is not satisfied                       |
| 4. Temporality                 | Refers to temporal relationship of association between exposure and disease outcome; to infer causality, exposure must precede outcome                                                                                                                                                | The pricing intervention studied must have taken place before a change in alcohol consumption or harm was observed                                                                                                                                                                          |
| 5. Dose-response               | If the association is one in which a dose-response curve or biological gradient can be observed, this adds to the case for causality                                                                                                                                                  | If interventions leading to a larger increase in prices had a greater effect on alcohol consumption and alcohol related harm than interventions where the price change was small, or if studies demonstrate that different minimum prices have differing effects, in the expected direction |
| 6. Plausibility                | A likely biological mechanism linking the intervention to the observed findings helps to explain causality, plausibility depends on biological knowledge of the day                                                                                                                   | Studies that found an association between price and population-level alcohol consumption and that heavier drinkers tend to purchase the cheapest alcohol could demonstrate plausibility                                                                                                     |
| 7. Coherence                   | When the evidence from different disciplines sources “hangs well together” and does not conflict with other generally known facts, this criterion is met                                                                                                                              | Describes whether studies conducted in different settings or disciplines had complementary findings. Will not be demonstrated by a single study in isolation but rather the evidence base as a whole                                                                                        |
| 8. Experiment                  | Experimental evidence from laboratory studies or RCTs could potentially provide strongest support for causation                                                                                                                                                                       | In addition to laboratory studies and RCTs, natural experiments with before-and-after measures could also show the effectiveness                                                                                                                                                            |



|            |                                                                                                                                                                |                                                                                                                                                                                                                                     |
|------------|----------------------------------------------------------------------------------------------------------------------------------------------------------------|-------------------------------------------------------------------------------------------------------------------------------------------------------------------------------------------------------------------------------------|
|            | This criterion often provides the strongest support for causation and describes whether there is empirical evidence for the association                        | of minimum unit pricing in a 'real world' setting                                                                                                                                                                                   |
| 9. Analogy | Causality is supported by analogy if there are similar associations or causal relationships in other areas of relevance, weakest form of evidence of causality | Other areas of relevance include whether higher taxation on alcohol is associated with reduced alcohol consumption and alcohol related harm, and may require drawing on additional literature outside of the main systematic review |

**RESULTS**

The included studies that are published in peer-reviewed journals (26 research studies and two systematic reviews) are listed by study type in Table 2 with information on study characteristics and methodological quality. Of the research studies, the methodological quality was rated as 'strong' in 15 studies, 'moderate' in 8 studies, and 'weak' in 3 studies. Both of the systematic reviews were rated 'strong'. The seven reports from the grey literature are listed in Table 3. Five of the seven were rated as of 'strong' methodological quality, with the remaining two not appropriate to rate using our critical appraisal tool.

For peer review only

Table 2: Studies published in peer-reviewed journals included in Bradford Hill criteria assessment

| Study type                                   | First author and year published | Study characteristics |                                                              |                                                          |                                                                                                                                                                 |                                         | Study assessment |                      |                | Bradford Hill criteria met*                                                        |
|----------------------------------------------|---------------------------------|-----------------------|--------------------------------------------------------------|----------------------------------------------------------|-----------------------------------------------------------------------------------------------------------------------------------------------------------------|-----------------------------------------|------------------|----------------------|----------------|------------------------------------------------------------------------------------|
|                                              |                                 | Country               | Study design                                                 | Population or participants                               | Pricing intervention studied                                                                                                                                    | Outcomes studied                        | Peer-reviewed    | Conflict of interest | Quality rating |                                                                                    |
| Natural experiments and time series analyses | Bhattacharya 2013 (19)          | Russia                | Time series analysis of panel data set                       | Populations of 77 Russian oblasts (provinces), 1970-2000 | Substantial increases in administratively-set alcohol prices 1985-1988, along with 6 other anti-alcohol measures                                                | Mortality                               | Yes              | Not stated           | Strong         | SA, CON, TE, PL, CO, EX,                                                           |
|                                              | Herttua 2015 (20)               | Finland               | Time series analysis                                         | General population using population registry             | Modelled 1% increase in the average minimum price of all alcoholic beverages based on actual price increases adjusted for inflation using Consumer Price Index  | Alcohol related mortality               | Yes              | None                 | Strong         | SA (not universal findings – subgroup only), CON (counter findings) TE, PL, CO, EX |
|                                              | Stockwell 2012 (2)              | Canada                | Cross-section versus time series analysis of ecological data | Population of British Columbia                           | Actual minimum price increased over a 20 year period. Study modelled a 10% increase in the average minimum price of all alcoholic beverages adjusted by monthly | Alcohol consumption (measured by sales) | Yes              | None                 | Strong         | SA, CON, TE, DR, CO, EX                                                            |

1  
2  
3  
4  
5  
6  
7  
8  
9  
10  
11  
12  
13  
14  
15  
16  
17  
18  
19  
20  
21  
22  
23  
24  
25  
26  
27  
28  
29  
30  
31  
32  
33  
34  
35  
36  
37  
38  
39  
40  
41  
42  
43  
44  
45  
46  
47  
48  
49

| Study type | First author and year published | Study characteristics |                                                              |                                                        |                                                                                                                                                                                                                              | Study assessment                         |               |                      | Bradford Hill criteria met* |                             |
|------------|---------------------------------|-----------------------|--------------------------------------------------------------|--------------------------------------------------------|------------------------------------------------------------------------------------------------------------------------------------------------------------------------------------------------------------------------------|------------------------------------------|---------------|----------------------|-----------------------------|-----------------------------|
|            |                                 | Country               | Study design                                                 | Population or participants                             | Pricing intervention studied                                                                                                                                                                                                 | Outcomes studied                         | Peer-reviewed | Conflict of interest |                             | Quality rating              |
|            |                                 |                       |                                                              |                                                        | Consumer Price Index adjusted by monthly Consumer Price Index                                                                                                                                                                |                                          |               |                      |                             |                             |
|            | Stockwell 2012 (3)              | Canada                | Cross-section versus time series analysis of ecological data | Population of Saskatchewan                             | Actual minimum price increased over a 7 year period. Study modelled a 10% increase in the average minimum price of all alcoholic beverages adjusted by monthly Consumer Price Index adjusted by monthly Consumer Price Index | Alcohol consumption (measured by sales)  | Yes           | Not stated           | Strong                      | SA, CON, TE, DR, CO, EX     |
|            | Stockwell 2013 (21)             | Canada                | Cross-section versus time series analysis of ecological data | Populations of 89 geographic areas in British Columbia | Actual minimum price increased over a 20 year period. Study modelled 10% increase in the average minimum price of all alcoholic beverages adjusted by monthly Consumer Price Index                                           | Alcohol-attributable hospital admissions | Yes           | Not stated           | Strong                      | SA, CON, TE, DR, PL, CO, EX |
|            | Treisman 2010 (22)              | Russia                | Secondary analysis of historical data with focus on price    | Population of Russia                                   | Price liberalisation of vodka in early 1990s - in 1993 real price of vodka was around 25% of that in 1990                                                                                                                    | Mortality                                | Yes           | Not stated           | Strong                      | SA, CON, TE, PL, CO, EX     |

| Study type        | First author and year published | Study characteristics |                                                              |                                                                                       |                                                                                                                                                                                                                   | Study assessment                                               |               |                      | Bradford Hill criteria met* |                             |
|-------------------|---------------------------------|-----------------------|--------------------------------------------------------------|---------------------------------------------------------------------------------------|-------------------------------------------------------------------------------------------------------------------------------------------------------------------------------------------------------------------|----------------------------------------------------------------|---------------|----------------------|-----------------------------|-----------------------------|
|                   |                                 | Country               | Study design                                                 | Population or participants                                                            | Pricing intervention studied                                                                                                                                                                                      | Outcomes studied                                               | Peer-reviewed | Conflict of interest |                             | Quality rating              |
|                   |                                 |                       | changes 1990-1994                                            |                                                                                       |                                                                                                                                                                                                                   |                                                                |               |                      |                             |                             |
|                   | Wald 1984 (23)                  | Poland                | Analysis of routine data 1970-1981                           | Population of Poland                                                                  | Poor harvest led to high prices, rationing and illegal sales                                                                                                                                                      | Alcohol consumption and alcohol-related hospital admissions    | Yes           | Not stated           | Weak                        | CON, TE, PL, CO, EX         |
|                   | Zhao 2013 (24)                  | Canada                | Cross-section versus time series analysis of ecological data | Populations of 16 Health Service Delivery Areas in British Columbia, Canada           | Actual minimum price increased over a 20 year period. Study modelled 10% increase in the average minimum price of all alcoholic beverages adjusted by monthly Consumer Price Index. Also looked at outlet density | Acute, chronic and wholly alcohol attributable mortality       | Yes           | None                 | Strong                      | SA, CON, TE, DR, PL, CO, EX |
| Modelling studies | Brennan 2014 (25)               | England               | Modelling study using SAPM                                   | UK national surveys of general population (subgroups of moderate, harmful, hazardous) | MUP of £0.40, £0.45 and £0.50. Ban on below cost selling                                                                                                                                                          | Alcohol consumption, consumer spending, 47 health harms, QALYs | Yes           | None                 | Strong                      | CON, SP, DR, PL, CO         |
|                   | Holmes 2014 (26)                | England               | Modelling study using                                        | UK national surveys of                                                                | MUP of 45p                                                                                                                                                                                                        | Alcohol consumption,                                           | Yes           | None                 | Strong                      | CON, SP, PL,                |

1  
2  
3  
4  
5  
6  
7  
8  
9  
10  
11  
12  
13  
14  
15  
16  
17  
18  
19  
20  
21  
22  
23  
24  
25  
26  
27  
28  
29  
30  
31  
32  
33  
34  
35  
36  
37  
38  
39  
40  
41  
42  
43  
44  
45  
46  
47  
48  
49

| Study type | First author and year published | Study characteristics |                            |                                                                                           |                                                                               | Study assessment                                                           |               |                      | Bradford Hill criteria met* |                     |
|------------|---------------------------------|-----------------------|----------------------------|-------------------------------------------------------------------------------------------|-------------------------------------------------------------------------------|----------------------------------------------------------------------------|---------------|----------------------|-----------------------------|---------------------|
|            |                                 | Country               | Study design               | Population or participants                                                                | Pricing intervention studied                                                  | Outcomes studied                                                           | Peer-reviewed | Conflict of interest |                             | Quality rating      |
|            |                                 |                       | SAPM                       | general population (subgroups of moderate, harmful, hazardous)                            |                                                                               | consumer spending, 47 health harms, QALYs                                  |               |                      |                             | CO                  |
|            | Meier 2009 (27)                 | UK                    | Modelling study using SAPM | UK national surveys of general population (subgroups of moderate, harmful, hazardous)     | 10 pricing policy options, including different levels of MUP (of 33 analysed) | Alcohol consumption, consumer spending, 47 health harms, crime, employment | Yes           | None                 | Strong                      | CON, SP, DR, PL, CO |
|            | Meier 2016 (28)                 | England               | Modelling study using SAPM | UK national surveys of general population (subgroups of moderate, increasing risk, heavy) | MUP of £0.50 compared with three alcohol taxation interventions               | Alcohol consumption in different income and socio-economic groups          | Yes           | None                 | Strong                      | CON, SP, PL, CO     |
|            | Purshouse 2010 (29)             | England               | Modelling study using SAPM | UK national surveys of general population (subgroups of moderate, harmful,                | 18 different pricing policies (including MUP)                                 | Alcohol consumption, consumer spending, 47 health harms, QALYs             | Yes           | None                 | Strong                      | CON, SP, DR, PL, CO |

| Study type              | First author and year published | Study characteristics |                         |                                                                                          |                                                                                               | Study assessment                   |               |                      | Bradford Hill criteria met* |                     |
|-------------------------|---------------------------------|-----------------------|-------------------------|------------------------------------------------------------------------------------------|-----------------------------------------------------------------------------------------------|------------------------------------|---------------|----------------------|-----------------------------|---------------------|
|                         |                                 | Country               | Study design            | Population or participants                                                               | Pricing intervention studied                                                                  | Outcomes studied                   | Peer-reviewed | Conflict of interest |                             | Quality rating      |
|                         |                                 |                       |                         | hazardous)                                                                               |                                                                                               |                                    |               |                      |                             |                     |
|                         | Sharma 2016 (30)                | Australia             | Counterfactual analysis | Representative sample of households (n=884) completing 12-month Homescan shopping survey | MUP of A\$2                                                                                   | Alcohol purchasing and consumption | Yes           | None                 | Strong                      | CON, SP, PL, CO     |
|                         | Vandenberg 2016 (31)            | Australia             | Modelling study         | Representative sample of households (n=885) completing Homescan shopping survey          | MUP of A\$1 compared with a specific alcohol tax                                              | Alcohol purchasing and consumption | Yes           | None                 | Strong                      | CON, SP, PL, CO     |
| Cross-sectional studies | Black 2011(32)                  | Scotland              | Cross-sectional survey  | 377 hospital patients with serious alcohol problems                                      | UK alcohol units purchased below proposed MUP of £0.40p/£0.50p                                | Alcohol consumption                | Yes           | None                 | Moderate                    | SA CON, DR, PL, CO  |
|                         | Callinan 2015 (33)              | Australia             | Cross-sectional survey  | Drinkers 18+ participating in Australian International Alcohol                           | Australian standard drinks purchased below proposed minimum prices of A\$0.80/A\$1.00/A\$1.25 | Alcohol consumption                | Yes           | Not stated           | Moderate                    | SA, CON, DR, PL, CO |

| Study type | First author and year published | Study characteristics |                        |                                                         |                                                                                                   | Study assessment                           |               |                      | Bradford Hill criteria met* |                      |
|------------|---------------------------------|-----------------------|------------------------|---------------------------------------------------------|---------------------------------------------------------------------------------------------------|--------------------------------------------|---------------|----------------------|-----------------------------|----------------------|
|            |                                 | Country               | Study design           | Population or participants                              | Pricing intervention studied                                                                      | Outcomes studied                           | Peer-reviewed | Conflict of interest |                             | Quality rating       |
|            |                                 |                       |                        | Control study (n=1,681)                                 |                                                                                                   |                                            |               |                      |                             |                      |
|            | Cousins 2016 (34)               | Ireland               | Cross-sectional survey | 3,187 adults in 2013 National Alcohol Diary Survey      | Alcohol units purchased below proposed minimum price of €1.00                                     | AUDIT-C score                              | Yes           | None                 | Strong                      | SA, CON, PL, CO      |
|            | Crawford 2012 (35)              | England               | Cross-sectional survey | 515 members of the public                               | UK alcohol units purchased below proposed MUP of £0.50                                            | AUDIT score                                | Yes           | None                 | Moderate                    | SA, CON, PL, CO      |
|            | Falkner 2015 (36)               | New Zealand           | Cross-sectional survey | 115 adults undergoing alcohol detoxification            | New Zealand standard drinks purchased below proposed minimum prices of NZ\$1.00/NZ\$1.10/NZ\$1.20 | Alcohol consumption                        | Yes           | No                   | Moderate                    | SA, CON, PL, CO      |
|            | Forsyth 2014 (37)               | Scotland              | Cross-sectional survey | Shopkeepers of 144 off licences in Glasgow              | MUP of £0.50                                                                                      | Products affected, and hospital admissions | Yes           | None                 | Weak                        | CON, PL (weakly), CO |
|            | Ludbrook 2012 (38)              | UK                    | Cross-sectional survey | Expenditure and Food Survey data from 2006-8 (n=18,624) | Purchasers of alcohol less than £0.45 per unit                                                    | Income of purchasers of cheap alcohol      | Yes           | Not stated           | Moderate                    | SA, CON, PL, CO      |
|            | Sharma 2014 (39)                | Australia             | Cross-sectional survey | Representative sample of households                     | MUP of A\$1, and taxation                                                                         | Alcohol consumption (measured by           | Yes           | None                 | Moderate                    | SA, CON, DR, PL,     |



| Study type           | First author and year published | Study characteristics |                                     |                                                      |                                                                                     |                                                                              | Study assessment |                      |                | Bradford Hill criteria met* |
|----------------------|---------------------------------|-----------------------|-------------------------------------|------------------------------------------------------|-------------------------------------------------------------------------------------|------------------------------------------------------------------------------|------------------|----------------------|----------------|-----------------------------|
|                      |                                 | Country               | Study design                        | Population or participants                           | Pricing intervention studied                                                        | Outcomes studied                                                             | Peer-reviewed    | Conflict of interest | Quality rating |                             |
|                      |                                 |                       |                                     | (n=885) completing shopping survey                   |                                                                                     | projected sales)                                                             |                  |                      |                | CO                          |
|                      | Sheron 2014 (40)                | UK                    | Cross-sectional survey              | Adult patients in a liver unit of a hospital (n=204) | UK alcohol units purchased below £0.50                                              | Alcohol consumption                                                          | Yes              | Not stated           | Moderate       | SA, CON, DR, PL, CO         |
| Intervention studies | Babor 1978 (41)                 | USA                   | Trial (not randomised)              | 34 male volunteers in live-in research facility      | 'Happy Hour' with a reduction in set price of alcohol for one group of participants | Alcohol consumption                                                          | Yes              | Not stated           | Weak           | SA, CON, SP, TE, CO, EX     |
| Qualitative studies  | Seaman 2013 (42)                | Scotland              | Qualitative study                   | 130 participants aged 16-30                          | Hypothetical minimum price increases                                                | Alcohol consumption and substitution with other substances                   | Yes              | None                 | Moderate       | CON, CO                     |
| Systematic reviews   | Wagenaar 2009 (43)              | Worldwide             | Systematic review and meta-analysis | Studies tended to cover general population           | Alcohol price and taxation interventions studied together                           | Alcohol consumption (measured by alcohol sales or self-reported consumption) | Yes              | None                 | Strong         | AN                          |
|                      | Wagenaar 2010 (44)              | Worldwide             | Systematic review and               | Studies tended to                                    | Alcohol price and taxation interventions                                            | Alcohol-related                                                              | Yes              | Not stated           | Strong         | AN                          |

Bradford-Hill assessment of the evidence for minimum pricing of alcohol

1  
2  
3  
4  
5  
6  
7  
8  
9  
10  
11  
12  
13  
14  
15  
16  
17  
18  
19  
20  
21  
22  
23  
24  
25  
26  
27  
28  
29  
30  
31  
32  
33  
34  
35  
36  
37  
38  
39  
40  
41  
42  
43  
44  
45  
46  
47  
48  
49

| Study type | First author and year published | Study characteristics |               |                            |                              |                                                                                                                                            | Study assessment |                      |                | Bradford Hill criteria met* |
|------------|---------------------------------|-----------------------|---------------|----------------------------|------------------------------|--------------------------------------------------------------------------------------------------------------------------------------------|------------------|----------------------|----------------|-----------------------------|
|            |                                 | Country               | Study design  | Population or participants | Pricing intervention studied | Outcomes studied                                                                                                                           | Peer-reviewed    | Conflict of interest | Quality rating |                             |
|            |                                 |                       | meta-analysis | cover general population   | studied together             | morbidity (disease, injury, suicide, traffic crashes, sexually transmitted diseases, other drug use, crime and misbehaviour) and mortality |                  |                      |                |                             |

\*Abbreviations used for the Bradford Hill criteria: strength of the association (SA), consistency (CON), specificity (SP), temporality (TE), dose-response (DR), plausibility (PL), coherence (CO), experiment (EX), analogy (AN)

Table 3: Studies published in the grey literature included in Bradford Hill criteria assessment

| Author and year published    | Study characteristics |                                         |                                                                                |                                                                                                                                               |                                                                                                    | Study assessment |                       |                      | Bradford Hill criteria met* |
|------------------------------|-----------------------|-----------------------------------------|--------------------------------------------------------------------------------|-----------------------------------------------------------------------------------------------------------------------------------------------|----------------------------------------------------------------------------------------------------|------------------|-----------------------|----------------------|-----------------------------|
|                              | Country               | Study design                            | Population or participants                                                     | Pricing intervention studied                                                                                                                  | Outcomes studied                                                                                   | Peer-reviewed?   | Conflict of interest? | Quality rating       |                             |
| Angus 2016 (45)              | Scotland              | Modelling study using SAPM              | Scottish general population survey (subgroups of moderate, harmful, hazardous) | MUP of 30p, 40p, 50p, 60p and 70p, compared with taxation interventions                                                                       | Alcohol consumption, consumer spending, exchequer and retail revenue, 47 health harms              | Not stated       | None                  | Strong               | CON, SP, DR, PL, CO         |
| Booth 2008 (46)              | Worldwide             | Review of reviews and systematic review | Studies tended to cover general population                                     | Various minimum unit prices and taxation interventions                                                                                        | Alcohol consumption and various measures of alcohol harm                                           | Yes              | None                  | Strong               | AN                          |
| Brennan 2008 (47)            | England               | Modelling study using SAPM              | Adults in England                                                              | General price increases. MUP of £0.20, £0.25, £0.30, £0.35, £0.40, £0.45, £0.50, £0.60 and £0.70. Restrictions on off-trade price promotions. | Alcohol consumption, consumer spending, sales duty and VAT, 47 health harms, crime, and employment | Not stated       | None                  | Strong               | CON, SP, DR, PL, CO         |
| Hill McManus 2012 (48)       | Canada                | Modelling study using SAPM              | Adults in two Canadian provinces (Ontario and British Columbia)                | MUP of C\$1.50                                                                                                                                | Alcohol consumption, consumer spending, hospital admissions, mortality, crime                      | No               | None                  | Strong               | CON, SP, PL, CO             |
| Institute for Fiscal Studies | Great Britain         | Economic modelling study                | Shopping data from 25,248 British households                                   | MUP of £0.45                                                                                                                                  | Alcohol consumption                                                                                | Not stated       | Not stated            | Not possible to rate | CON, SP, CO                 |

1  
2  
3  
4  
5  
6  
7  
8  
9  
10  
11  
12  
13  
14  
15  
16  
17  
18  
19  
20  
21  
22  
23  
24  
25  
26  
27  
28  
29  
30  
31  
32  
33  
34  
35  
36  
37  
38  
39  
40  
41  
42  
43  
44  
45  
46  
47  
48  
49

| Author and year published              | Study characteristics |                            |                             |                                                                                                                      |                                                                            | Study assessment |                       |                      | Bradford Hill criteria met* |
|----------------------------------------|-----------------------|----------------------------|-----------------------------|----------------------------------------------------------------------------------------------------------------------|----------------------------------------------------------------------------|------------------|-----------------------|----------------------|-----------------------------|
|                                        | Country               | Study design               | Population or participants  | Pricing intervention studied                                                                                         | Outcomes studied                                                           | Peer-reviewed?   | Conflict of interest? | Quality rating       |                             |
| 2010 (49)                              |                       | using market research data |                             |                                                                                                                      |                                                                            |                  |                       |                      |                             |
| Institute for Fiscal Studies 2013 (50) | Great Britain         | Economic analysis          | Population of Great Britain | MUP of £0.45 and increased alcohol taxation                                                                          | Alcohol consumption                                                        | Not stated       | Not stated            | Not possible to rate | CON, SP, CO                 |
| Meng 2010 (51)                         | Scotland              | Modelling study using SAPM | Adults in Scotland          | MUP of £0.20, £0.25, £0.30, £0.35, £0.40, £0.45, £0.50, £0.60 and £0.70. Restrictions on off-trade price promotions. | Alcohol consumption, consumer spending, 47 health harms, crime, employment | Not stated       | None                  | Strong               | CON, SP, DR, PL, CO         |

\*Abbreviations used for the Bradford Hill criteria: strength of the association (SA), consistency (CON), specificity (SP), temporality (TE), dose-response (DR), plausibility (PL), coherence (CO), experiment (EX), analogy (AN)

## Consideration against the Bradford Hill criteria for determining causality

### 1. Strength of the association

In 16/26 studies published in peer-reviewed journals, strength of the association between pricing and alcohol consumption or alcohol related harm was evidenced by a summary statistic such as an odds ratio, and by a test of the statistical significance of the association. As well as the statistical significance of the summary statistic, the magnitude of the effect was also considered, as a larger effect size corresponds to a greater population health impact. Studies in Canada found that 10% increases in minimum prices were associated with reductions in alcohol consumption of 3.4-8.4% (2,3), reductions in alcohol attributable hospital admissions of 9% (21), and reductions in alcohol-related mortality of 32%, each of which was statistically significant (24). Cross-sectional studies in the UK, Ireland, Australia (32–36,38–40) and one trial from the USA (41) found statistically significant associations between cheaper alcohol and heavier drinking. The magnitude of the association varied across these studies but due to different study measures and outcomes the results are not all comparable. As an indication, the odds ratio (OR) for buying alcohol below a proposed minimum price among heavier drinkers was 1.34 in Crawford's study (35), 1.50 in Cousins's study (34) and 1.70 in Callinan's study (33). There was not any evidence to support this criterion from the grey literature. Overall there is reasonably good support for the strength of the association criterion.

### 2. Consistency

This criterion requires looking across all the studies included in the review to see whether similar conclusions have been drawn. Inverse associations between alcohol pricing and alcohol consumption or harm have been documented in countries in Europe, North America and Australia, and although most studies are from the last 10 years, there are studies from the 1970s and 1980s as well. There is evidence from different research teams and different types of study including cross-sectional studies, time series analyses and econometric modelling studies. Support for the consistency criterion is very strong.

### 3. Specificity

The specificity criterion relates to whether changes in alcohol consumption or harm could be attributed to anything other than the price intervention. Many studies included have statistically adjusted for confounding factors, however the best support for the specificity criterion comes from the econometric modelling studies because there is no risk of residual confounding. The Sheffield Alcohol Policy Model is one such model and has been applied in England (25–29,47), Scotland (45,51) and Canada (48) and provides very strong support for the specificity criterion. Further support is provided by other different modelling studies in the UK (49,50) and Australia (30,31) and a (non-randomised) trial in the US (41). Thus support for the specificity criteria is very strong.

### 4. Temporality

It is important that pricing interventions take place before changes to alcohol consumption and harm in order to attribute causality. Strong support for this criterion comes from research following the introduction of MUP in Canada, where minimum price increases preceded reductions in alcohol consumption (2,3), alcohol attributable hospital admissions (21), and alcohol-related mortality (24). Studies where price changes preceded the expected changes in alcohol consumption or harm have

1  
2  
3 also been conducted in Russia (19,22), Poland (23), and Finland (20). Overall there is very strong  
4 support for the temporality criterion.  
5

#### 6 5. Dose-response/biological gradient 7

8 This criterion is supported if different price levels have been found to have differing effects on  
9 consumption or harm. Many of the studies using the Sheffield Alcohol Policy Model explore the  
10 impact of a range of potential MUP options (25,27,29,45,51), and these consistently suggest that the  
11 higher the MUP, the greater the reductions in alcohol consumption or alcohol-related harms. The  
12 Canadian studies of minimum pricing lend further support for this criterion because the analysis  
13 presents the effect on consumption or harm of a modelled 1% increase in price, meaning dose-  
14 response can be inferred (2,3,21,24). Dose response is supported to a lesser extent by evidence from  
15 cross-sectional studies that heavier drinkers are more likely to pay less than a proposed MUP (32-  
16 34,39,40). Overall, there is strong support for the dose-response criterion, although the relationship  
17 is difficult to quantify.  
18  
19  
20

#### 21 6. Plausibility 22

23 This criterion refers to whether there is evidence that alcohol price can be used as an economic  
24 mechanism to influence consumption at a population level, and whether heavy drinkers tend to  
25 purchase cheaper alcohol. There is evidence from 21/26 research studies 4/7 studies in the grey  
26 literature that the price of alcohol is inversely related to alcohol-related morbidity, hospital  
27 admissions, or mortality. Moreover, there is also evidence from numerous cross-sectional studies in  
28 the UK, Ireland and Australia (32-36,38-40) and one trial from the USA (41) that heavier drinking  
29 was significantly associated with purchasing alcohol below specified prices, further suggesting that  
30 economic mechanisms such as minimum pricing would particularly affect the heaviest drinkers. This  
31 provides strong support for the plausibility criterion.  
32  
33  
34

#### 35 7. Coherence 36

37 This criterion refers to whether studies from different disciplines have had complementary findings  
38 and whether these fit or 'hang' well together. It is different to consistency, which is more concerned  
39 with reproducibility of findings. The findings of the majority of studies supported the coherence  
40 criterion in that they suggest that real-world minimum unit pricing (e.g. (2,3,21,24)) or minimum  
41 price increases (e.g. (19,20,23)) led to reductions in alcohol consumption and alcohol-related harm  
42 and cross sectional surveys find that it is the heavier drinkers that are drinking the cheapest alcohol  
43 (e.g. (32,40)). The modelling studies which utilise survey data in turn suggest heavier drinkers will be  
44 most affected by MUP (e.g. (26)), Overall the evidence base provides strong support for this  
45 criterion.  
46  
47  
48

#### 49 8. Experiment 50

51 We have not identified any randomised controlled trials of minimum pricing or price-based  
52 interventions to reduce alcohol consumption. There is a small (and not randomised) trial from the  
53 1970s (41) which found participants living in controlled conditions and offered a daily 'Happy Hour'  
54 discount drank significantly more alcohol than those who were not offered the discount. There is  
55 however substantial evidence in support of the experiment criterion from time series analyses or  
56 natural experiments, for example where minimum pricing was introduced in Canada (3,21,24) and  
57  
58  
59  
60

1  
2  
3 where prices fluctuated in the late 1980s and early 1990s in Russia (19,22), and to a lesser extent in  
4 Finland, where minimum price increases were associated with reduced mortality only among men  
5 with a basic education (20). These studies provide tentative support for the experiment criterion.  
6

### 7 8 9. Analogy

9  
10 To address the analogy criterion areas related to minimum alcohol pricing must be considered.  
11 There is evidence from literature on the affordability of alcohol (52) that consumption and harm are  
12 very responsive to the affordability of alcohol. Large systematic reviews have investigated the price  
13 elasticity of demand for alcohol (53), and have found that higher alcohol pricing and taxation  
14 (considered together) are associated with reductions in alcohol consumption, alcohol-related  
15 morbidity and mortality (43,44,46). Overall the support for the analogy criterion is very strong,  
16 although Bradford Hill describes this as the weakest evidence for causality.  
17  
18

## 19 **DISCUSSION**

20  
21 We assessed 26 research studies and two systematic reviews, plus a further seven studies from the  
22 grey literature in this review of the evidence for priced based interventions – such as MUP - to  
23 reduce alcohol consumption and alcohol-related harm. All nine of the Bradford Hill criteria for  
24 causality were met and the vast majority of studies offered support for price-based alcohol policy  
25 interventions. However, the evidence for two of the criteria, although present, was not as strong as  
26 it was for the other criteria. These criteria were strength of the association (criterion 1) and  
27 experiment (criterion 8), and according to Bradford Hill these are the two criteria that can provide  
28 the strongest evidence for causality. Therefore although all of the criteria were supported, we  
29 conclude that it is highly probable, but not definite, that introducing MUP for alcohol would reduce  
30 alcohol consumption and alcohol-related harms. It is also of note that different types of study  
31 tended to satisfy different Bradford Hill criteria, and that different study designs also produced  
32 evidence of the effectiveness of minimum pricing in relation to different outcomes. This is  
33 summarised in Figure 2. This underlines the importance of including a variety of study designs in this  
34 review.  
35  
36  
37  
38

39 [figure 2 to go here]

40  
41 Strengths of this study are that this is the first to have systematically reviewed the literature relevant  
42 specifically to alcohol minimum pricing policies. We had broad inclusion criteria with regards to  
43 study design, price intervention and outcome measure, allowing for a comprehensive review of the  
44 evidence base. Application of the Bradford Hill criteria as part of a narrative systematic literature  
45 review is a useful and emergent technique for identifying causality: a PubMed search for systematic  
46 reviews with Bradford Hill' mentioned in the title or abstract yielded 28 results, 90% of which were  
47 published in the last five years. The limitations of this systematic review relate mainly to the broad  
48 range of studies included. It was not possible to conduct any kind of meta-analysis and therefore we  
49 do not present a pooled estimate for the likely effect of MUP on certain outcomes. The exact effect  
50 of any MUP would be influenced by a range of factors, including: the minimum price level chosen,  
51 how broadly it is applied, how strongly it is enforced, and contextual factors such as affordability (in  
52 the UK alcohol was 54% more affordable in 2014 than it was in 1980 (16)), other governmental  
53 regulations and the price level pre-MUP. Occasionally, minimum pricing has been implemented as  
54  
55  
56  
57  
58  
59  
60



1  
2  
3 part of a range of measures (e.g. (19)), and these studies were considered alongside studies where  
4 MUP was implemented in isolation. This emphasises the importance of the specificity criterion.  
5

6 There were also challenges with the quality appraisal. The EPHPP quality assessment tool was used  
7 to assess quantitative studies and the majority of studies were rated as strong or moderate.  
8 However it was not possible to appraise two of the studies from the grey literature using this tool,  
9 and there were some challenges assessing the econometric modelling studies against this  
10 framework. However overall we think that our quality appraisal across the different studies is  
11 broadly comparable. It should also be noted that although a number of studies were rated as  
12 'strong', this is in relation to their respective study designs and does not reflect the position of the  
13 study type in the hierarchy of evidence framework.  
14  
15

16  
17 This is the first systematic review that has addressed the effectiveness of minimum alcohol price  
18 interventions such as MUP using the Bradford Hill criteria. It was beyond the scope of this review to  
19 study the impact of generalised increases in alcohol prices (as opposed to minimum prices).  
20 However where such studies have been done, a minimum price or floor price has been  
21 recommended, for example in Gruenewald's 2006 study in Sweden which found that the lowest  
22 quality (the cheapest) alcohol has the highest price elasticity (54). Previous systematic reviews of  
23 alcohol price and consumption (43) and alcohol-related harm (44) have tended to consider the effect  
24 of price increases and increased taxation together. These reviews found significant effects on  
25 consumption and morbidity and mortality. Although price regulation and taxation are closely related  
26 policy options, evidence from surveys (55) and modelling studies (45) suggests that the effects of  
27 each are different, although it is known that the majority of tax increases are passed on as increased  
28 prices for consumers (43,56). It was beyond the scope of this review to discuss whether MUP is  
29 regressive in detail, but as it only affects the prices of the cheapest drinks, which are usually  
30 consumed by the heaviest drinkers, MUP is likely to narrow health inequalities (28,31). A recent  
31 rapid evidence review published in The Lancet examined alcohol control policies in England and  
32 recommended a combination of MUP and tax increases to reduce alcohol harm and increase  
33 government revenue, rather than either in isolation (57). It is also important to highlight that a  
34 considerable proportion of included studies were produced by a small number of research teams.  
35 Also, with regards to the econometric modelling studies, uncertainty in estimates or forecasts is  
36 often poorly communicated outside of the academic literature. The overall risk of bias in the  
37 included studies was minimised by excluding studies with a conflict of interest (either for or against  
38 MUP). It was not possible to assess publication bias using an analytical technique such as a funnel  
39 plot due to the narrative nature of the review, however we anticipate that by including grey  
40 literature in this review we have mitigated publication bias as far as reasonably possible.  
41  
42  
43  
44  
45  
46  
47

48 Overall the findings of this review lend strong support for policies such as MUP in reducing alcohol  
49 consumption and alcohol-related harm, with all nine of the Bradford Hill criteria met, and little by  
50 way of counter findings. As it is unlikely to be feasible to conduct randomised controlled trials (RCTs)  
51 of MUP, the decision whether or not to introduce MUP will not be informed by a systematic review  
52 and meta-analysis of RCTs, and therefore this synthesis of evidence according to the Bradford Hill  
53 criteria is of value.  
54

55  
56 Unanswered questions about the effectiveness of MUP remain; for example, this review has  
57 highlighted that support was moderate or tentative for two of the Bradford Hill criteria ('strength of  
58  
59  
60



1  
2  
3 the association' and 'experiment' respectively). There may be opportunities to explore this in  
4 countries such as Scotland if MUP is implemented. If Scotland were to implement MUP, then it  
5 would be possible to evaluate the validity of the Sheffield Alcohol Policy Model studies conducted  
6 using Scottish data. It would also be possible to conduct a longitudinal study to evaluate the  
7 effectiveness of MUP in reducing alcohol consumption and alcohol-related morbidity and mortality.  
8 The findings of this natural experiment would have relevance elsewhere within and outside the UK.  
9  
10

### 11 **ACKNOWLEDGEMENTS**

12  
13 We would like to thank Rebecca McDonald for advice on using the Bradford Hill criteria in a  
14 systematic review, Dr James Nicholls for advice on study interpretation, and Dr Daniel Stahl for  
15 statistical advice on some of the included studies.  
16  
17

### 18 **CONTRIBUTIONS**

19  
20 SM conceived the idea. SB conducted the initial search. SM and SM contributed to independently  
21 reviewing abstracts, hand-searching reference lists, completing data extraction, and conducting  
22 quality appraisal. All authors contributed to the analysis and interpretation of the results and  
23 contributed to writing the manuscript. SB is guarantor.  
24  
25

### 26 **FUNDING**

27  
28 This research received no specific grant from any funding agency in the public, commercial or not-  
29 for-profit sectors.  
30  
31

### 32 **COMPETING INTERESTS**

33 All authors have completed the ICMJE uniform disclosure form at [www.icmje.org/coi\\_disclosure.pdf](http://www.icmje.org/coi_disclosure.pdf)  
34 and declare: no support from any organisation for the submitted work; no financial relationships  
35 with any organisations that might have an interest in the submitted work in the previous three  
36 years; no other relationships or activities that could appear to have influenced the submitted work.  
37  
38

39 Two of the authors work at King's College London, which as an institution is listed as a member of  
40 the Alcohol Health Alliance. SM has received funding indirectly from UKCTAS, which as an institution  
41 is also listed as a member of the Alcohol Health Alliance. However none of the authors have any  
42 relationship with the Alcohol Health Alliance.  
43  
44  
45  
46  
47  
48  
49  
50  
51  
52  
53  
54  
55  
56  
57  
58  
59  
60

**FIGURE LEGENDS**

Figure 1: PRISMA 2009 flow diagram of studies in this systematic review

Figure 2: This model shows that different study types tended to produce evidence of effectiveness of minimum pricing in relation to different outcomes. Studies cited in the figure are key examples of the literature in that area and do not represent an exhaustive list.

**REFERENCES**

1. Anderson P, Chisholm D, Fuhr DC. Effectiveness and cost-effectiveness of policies and programmes to reduce the harm caused by alcohol. *Lancet Lond Engl*. 2009 Jun 27;373(9682):2234–46.
2. Stockwell T, Auld MC, Zhao J, Martin G. Does minimum pricing reduce alcohol consumption? The experience of a Canadian province. *Addiction*. 2012 May 1;107(5):912–20.
3. Stockwell T, Zhao J, Giesbrecht N, Macdonald S, Thomas G, Wettlaufer A. The Raising of Minimum Alcohol Prices in Saskatchewan, Canada: Impacts on Consumption and Implications for Public Health. *Am J Public Health*. 2012 Oct 18;102(12):e103–10.
4. World Health Organization. European status report on alcohol and health 2014. Pricing policies [Internet]. World Health Organization; 2014. Available from: [http://www.euro.who.int/\\_\\_data/assets/pdf\\_file/0003/244902/Pricing-policies.pdf](http://www.euro.who.int/__data/assets/pdf_file/0003/244902/Pricing-policies.pdf)
5. Department of Health (Ireland). The Public Health (Alcohol) Bill 2015 [Internet]. 2015 [cited 2017 Feb 17]. Available from: <http://health.gov.ie/blog/publications/public-health-alcohol-bill-2015/>
6. The Guardian. Minimum alcohol price not in the public interest, says health agency. *The Guardian* [Internet]. 2014 May 1 [cited 2017 Feb 17]; Available from: <https://www.theguardian.com/world/2014/may/01/minimum-alcohol-price-not-in-the-public-interest-says-health-agency>
7. New Zealand Ministry of Justice. Alcohol minimum pricing policies [Internet]. [cited 2017 Feb 17]. Available from: <https://justice.govt.nz/justice-sector-policy/key-initiatives/sale-and-supply-of-alcohol/alcohol-minimum-pricing-report/>
8. Home Office. Guidance on banning the sale of alcohol below the cost of duty plus VAT. For suppliers of alcohol and enforcement authorities in England and Wales [Internet]. 2015 [cited 2016 Jun 3]. Available from: [https://www.gov.uk/government/uploads/system/uploads/attachment\\_data/file/415522/HO\\_Guidance\\_on\\_BBCS.pdf](https://www.gov.uk/government/uploads/system/uploads/attachment_data/file/415522/HO_Guidance_on_BBCS.pdf)
9. Off Licence News. First conviction for selling alcohol “below cost” sees retailer fined [Internet]. 2016 [cited 2016 Jun 3]. Available from: [http://www.offlicencenews.co.uk/news/fullstory.php/aid/15750/First\\_conviction\\_for\\_selling\\_alcohol\\_\\_below\\_cost\\_\\_sees\\_retailer\\_fined.html](http://www.offlicencenews.co.uk/news/fullstory.php/aid/15750/First_conviction_for_selling_alcohol__below_cost__sees_retailer_fined.html)

10. Home Office. Duty plus VAT permitted price calculator (2015) [Internet]. 2016. Available from: <https://www.gov.uk/government/publications/banning-the-sale-of-alcohol-below-the-cost-of-duty-plus-vat-march-2015>
11. HM Government. The Government's Alcohol Strategy [Internet]. 2012 [cited 2016 Jun 3]. Available from: [https://www.gov.uk/government/uploads/system/uploads/attachment\\_data/file/224075/alcohol-strategy.pdf](https://www.gov.uk/government/uploads/system/uploads/attachment_data/file/224075/alcohol-strategy.pdf)
12. Scottish Government. Minimum Unit Pricing [Internet]. [cited 2017 Feb 17]. Available from: <http://www.gov.scot/Topics/Health/Services/Alcohol/minimum-pricing>
13. Court of Justice of the European Union. Press Release 155/15: The Scottish legislation introducing a minimum price per unit of alcohol is contrary to EU law if less restrictive tax measures can be introduced [Internet]. 2015 [cited 2017 Feb 17]. Available from: <http://curia.europa.eu/jcms/upload/docs/application/pdf/2015-12/cp150155en.pdf>
14. Judiciary of Scotland. Scotch Whisky Association and others v Lord Advocate and Advocate General for Scotland [Internet]. [cited 2016 Jul 11]. Available from: <http://www.scotland-judiciary.org.uk/9/1672/Scotch-Whisky-Association-and-others-v-Lord-Advocate-and-Advocate-General-for-Scotland>
15. BBC News. Bid to appeal against minimum alcohol pricing to Supreme Court. 2016 Nov 18 [cited 2017 Feb 17]; Available from: <http://www.bbc.co.uk/news/uk-scotland-scotland-politics-38026073>
16. Lifestyles Statistics Team,, Health and Social Care Information Centre. Statistics on Alcohol. England, 2015 [Internet]. 2015 [cited 2016 Jun 3]. Available from: <http://www.hscic.gov.uk/catalogue/PUB17712/alc-eng-2015-rep.pdf>
17. Cochrane Handbook. 21.4 Assessment of study quality and risk of bias [Internet]. [cited 2016 Jun 2]. Available from: [http://handbook.cochrane.org/chapter\\_21/21\\_4\\_assessment\\_of\\_study\\_quality\\_and\\_risk\\_of\\_bias.htm](http://handbook.cochrane.org/chapter_21/21_4_assessment_of_study_quality_and_risk_of_bias.htm)
18. Hill AB. The Environment and Disease: Association or Causation? *Proc R Soc Med.* 1965 May;58(5):295–300.
19. Bhattacharya J, Gathmann C, Miller G. The Gorbachev Anti-Alcohol Campaign and Russia's Mortality Crisis. *Am Econ J Appl Econ.* 2013;5(2):232–60.
20. Herttua K, Mäkelä P, Martikainen P. Minimum Prices for Alcohol and Educational Disparities in Alcohol-related Mortality. *Epidemiology.* 2015 May;26(3):337–43.
21. Stockwell T, Zhao J, Martin G, Macdonald S, Vallance K, Treno A, et al. Minimum Alcohol Prices and Outlet Densities in British Columbia, Canada: Estimated Impacts on Alcohol-Attributable Hospital Admissions. *Am J Public Health.* 2013 Apr 18;103(11):2014–20.
22. Treisman D. Death and prices. *Econ Transit.* 2010 Apr 1;18(2):281–331.

- 1
- 2
- 3 23. Wald I, Moskalewicz J. Alcohol policy in a crisis situation. *Br J Addict*. 1984
- 4 Sep;79(3):331–5.
- 5
- 6 24. Zhao J, Stockwell T, Martin G, Macdonald S, Vallance K, Treno A, et al. The
- 7 relationship between minimum alcohol prices, outlet densities and alcohol-attributable
- 8 deaths in British Columbia, 2002–09. *Addiction*. 2013 Jun 1;108(6):1059–69.
- 9
- 10 25. Brennan A, Meng Y, Holmes J, Hill-McManus D, Meier PS. Potential benefits of
- 11 minimum unit pricing for alcohol versus a ban on below cost selling in England 2014:
- 12 modelling study. *The BMJ*. 2014 Sep 30;349:g5452.
- 13
- 14 26. Holmes J, Meng Y, Meier PS, Brennan A, Angus C, Campbell-Burton A, et al. Effects of
- 15 minimum unit pricing for alcohol on different income and socioeconomic groups: a
- 16 modelling study. *The Lancet*. 2014 May 16;383(9929):1655–64.
- 17
- 18 27. Meier PS, Purshouse R, Brennan A. Policy options for alcohol price regulation: the
- 19 importance of modelling population heterogeneity. *Addiction*. 2010 Mar 1;105(3):383–
- 20 93.
- 21
- 22 28. Meier PS, Holmes J, Angus C, Ally AK, Meng Y, Brennan A. Estimated Effects of
- 23 Different Alcohol Taxation and Price Policies on Health Inequalities: A Mathematical
- 24 Modelling Study. *PLOS Med*. 2016 Feb 23;13(2):e1001963.
- 25
- 26 29. Purshouse RC, Meier PS, Brennan A, Taylor KB, Rafia R. Estimated effect of alcohol
- 27 pricing policies on health and health economic outcomes in England: an epidemiological
- 28 model. *The Lancet*. 2010 Apr;375(9723):1355–64.
- 29
- 30 30. Sharma A, Etilé F, Sinha K. The Effect of Introducing a Minimum Price on the
- 31 Distribution of Alcohol Purchase: A Counterfactual Analysis. *Health Econ*. 2016
- 32 Sep;25(9):1182–200.
- 33
- 34 31. Vandenberg B, Sharma A. Are Alcohol Taxation and Pricing Policies Regressive?
- 35 Product-Level Effects of a Specific Tax and a Minimum Unit Price for Alcohol. *Alcohol*
- 36 *Alcohol Oxf Oxf*. 2016 Jul;51(4):493–502.
- 37
- 38 32. Black H, Gill J, Chick J. The price of a drink: levels of consumption and price paid per
- 39 unit of alcohol by Edinburgh’s ill drinkers with a comparison to wider alcohol sales in
- 40 Scotland. *Addiction*. 2011 Apr 1;106(4):729–36.
- 41
- 42 33. Callinan S, Room R, Livingston M, Jiang H. Who Purchases Low-Cost Alcohol in
- 43 Australia? *Alcohol Alcohol*. 2015 Jun 24;agv066.
- 44
- 45 34. Cousins G, Mongan D, Barry J, Smyth B, Rackard M, Long J. Potential Impact of
- 46 Minimum Unit Pricing for Alcohol in Ireland: Evidence from the National Alcohol Diary
- 47 Survey. *Alcohol Alcohol*. 2016 Nov 26;51(6):734–40.
- 48
- 49 35. Crawford MJ, Parry AMH, Weston ARW, Seretis D, Zauter-Tutt M, Hussain A, et al.
- 50 Relationship between price paid for off-trade alcohol, alcohol consumption and income in
- 51 England: a cross-sectional survey. *Alcohol Alcohol Oxf Oxf*. 2012 Dec;47(6):738–42.
- 52
- 53 36. Falkner C, Christie G. The effect of alcohol price on dependent drinkers’ alcohol
- 54 consumption. *N Z Med J*. 2015;128(1427).
- 55
- 56
- 57
- 58
- 59
- 60

- 1  
2  
3 37. Forsyth AJM, Ellaway A, Davidson N. How Might the Alcohol Minimum Unit Pricing  
4 (MUP) Impact upon Local Off-Sales Shops and the Communities Which They Serve?  
5 Alcohol Alcohol. 2014 Jan 1;49(1):96–102.  
6
- 7 38. Ludbrook PA, Petrie D, McKenzie L, Farrar S. Tackling alcohol misuse: Purchasing  
8 patterns affected by minimum pricing for alcohol. *Appl Health Econ Health Policy*. 2012  
9 Aug 6;10(1):51–63.  
10
- 11 39. Sharma A, Vandenberg B, Hollingsworth B. Minimum Pricing of Alcohol versus  
12 Volumetric Taxation: Which Policy Will Reduce Heavy Consumption without Adversely  
13 Affecting Light and Moderate Consumers? *PLoS ONE*. 2014 Jan 22;9(1):e80936.  
14
- 15 40. Sheron N, Chilcott F, Matthews L, Challoner B, Thomas M. Impact of minimum price  
16 per unit of alcohol on patients with liver disease in the UK. *Clin Med*. 2014 Aug  
17 1;14(4):396–403.  
18
- 19 41. Babor TF, Mendelson JH, Greenberg I, Kuehnle J. Experimental analysis of the 'happy  
20 hour": effects of purchase price on alcohol consumption. *Psychopharmacology (Berl)*.  
21 1978 Jun 15;58(1):35–41.  
22
- 23 42. Seaman P, Edgar F, Ikegwuonu T. The role of alcohol price in young adult drinking  
24 cultures in Scotland. *Drugs Educ Prev Policy*. 2013 Aug 1;20(4):278–85.  
25
- 26 43. Wagenaar AC, Salois MJ, Komro KA. Effects of beverage alcohol price and tax levels on  
27 drinking: a meta-analysis of 1003 estimates from 112 studies. *Addict Abingdon Engl*.  
28 2009 Feb;104(2):179–90.  
29
- 30 44. Wagenaar AC, Tobler AL, Komro KA. Effects of alcohol tax and price policies on  
31 morbidity and mortality: a systematic review. *Am J Public Health*. 2010  
32 Nov;100(11):2270–8.  
33
- 34 45. Angus C, Holmes J, Pryce R, Meier P, Brennan A. Model-based appraisal of the  
35 comparative impact of Minimum Unit Pricing and taxation policies in Scotland An  
36 adaptation of the Sheffield Alcohol Policy Model version 3 [Internet]. ScHARR,  
37 University of Sheffield; 2016 Apr [cited 2016 Apr 7]. Available from:  
38 [https://www.shef.ac.uk/polopoly\\_fs/1.565373!/file/Scotland\\_report\\_2016.pdf](https://www.shef.ac.uk/polopoly_fs/1.565373!/file/Scotland_report_2016.pdf)  
39
- 40 46. Booth A, Brennan A, Meier PS, O'Reilly D, Purshouse R, Stockwell T, et al. Independent  
41 review of the effects of alcohol pricing and promotion: part A – systematic reviews.  
42 Project Report for the Department of Health September 2008. ScHARR University of  
43 Sheffield; 2008.  
44
- 45 47. Brennan A, Purshouse R, Taylor K, Rafia R. Independent review of the effects of alcohol  
46 pricing and promotion: part B. Modelling the Potential Impact of Pricing and Promotion  
47 Policies for Alcohol in England: Results from the Sheffield Alcohol Policy Model  
48 Version 2008(1-1) [Internet]. ScHARR University of Sheffield; 2008. Available from:  
49 [https://www.shef.ac.uk/polopoly\\_fs/1.95621!/file/PartB.pdf](https://www.shef.ac.uk/polopoly_fs/1.95621!/file/PartB.pdf)  
50
- 51 48. Hill McManus D, Brennan A, Stockwell T, Giesbrecht N, Thomas G, Zhao J, et al.  
52 Model-based appraisal of alcohol minimum pricing in Ontario and British Columbia: A  
53 Canadian adaptation of the Sheffield Alcohol Policy Model Version 2 [Internet]. 2012.  
54  
55  
56  
57  
58  
59  
60

1  
2  
3 Available from: <http://www.uvic.ca/research/centres/carbc/assets/docs/report-model-based-appraisal.pdf>  
4  
5

- 6 49. Institute for Fiscal Studies. The Impact of Introducing a Minimum Price on Alcohol in  
7 Britain. IFS Briefing Note BN109. 2010.  
8
- 9 50. Institute for Fiscal Studies. Price-based measures to reduce alcohol consumption. IFS  
10 Briefing Note BN138. 2013.  
11
- 12 51. Meng Y, Purshouse R, Brennan A, Meier PS. Model-based appraisal of alcohol minimum  
13 pricing and off-licensed trade discount bans in Scotland using the Sheffield Alcohol  
14 Policy Model (v.2): Second update based on newly available data [Internet]. 2010.  
15 Available from: [http://www.shef.ac.uk/polopoly\\_fs/1.96510!/file/scotlandupdate.pdf](http://www.shef.ac.uk/polopoly_fs/1.96510!/file/scotlandupdate.pdf)  
16  
17
- 18 52. Rabinovich L, Brutscher P-B, de Vries H, Tiessen J, Clift J, Reding A. The affordability  
19 of alcoholic beverages in the European Union. 2012;  
20
- 21 53. Gallet CA. The Demand for Alcohol: A Meta-Analysis of Elasticities [Internet].  
22 Rochester, NY: Social Science Research Network; 2007 May [cited 2016 Jan 6]. Report  
23 No.: ID 985689. Available from: <http://papers.ssrn.com/abstract=985689>  
24
- 25 54. Gruenewald PJ, Ponicki WR, Holder HD, Romelsjö A. Alcohol prices, beverage quality,  
26 and the demand for alcohol: quality substitutions and price elasticities. *Alcohol Clin Exp*  
27 *Res.* 2006 Jan;30(1):96–105.  
28
- 29 55. Ally AK, Meng Y, Chakraborty R, Dobson PW, Seaton JS, Holmes J, et al. Alcohol tax  
30 pass-through across the product and price range: do retailers treat cheap alcohol  
31 differently? *Addiction.* 2014 Dec 1;109(12):1994–2002.  
32  
33
- 34 56. Rabinovich L, Hunt P, Staetsky L, Goshev S, Nolte E, Pedersen JS, et al. Further study  
35 on the affordability of alcoholic beverages in the EU [Internet]. 2012 [cited 2017 Feb 17].  
36 Available from: [http://www.rand.org/pubs/technical\\_reports/TR1203.html](http://www.rand.org/pubs/technical_reports/TR1203.html)  
37
- 38 57. Burton R, Henn C, Lavoie D, O'Connor R, Perkins C, Sweeney K, et al. A rapid evidence  
39 review of the effectiveness and cost-effectiveness of alcohol control policies: an English  
40 perspective. *The Lancet* [Internet]. 2016 Dec 2 [cited 2017 Feb 17];0(0). Available from:  
41 [http://www.thelancet.com/journals/lancet/article/PIIS0140-6736\(16\)32420-5/abstract](http://www.thelancet.com/journals/lancet/article/PIIS0140-6736(16)32420-5/abstract)  
42  
43  
44  
45  
46  
47  
48  
49  
50  
51  
52  
53  
54  
55  
56  
57  
58  
59  
60



1  
2  
3  
4  
5  
6  
7  
8  
9  
10  
11  
12  
13  
14  
15  
16  
17  
18  
19  
20  
21  
22  
23  
24  
25  
26  
27  
28  
29  
30  
31  
32  
33  
34  
35  
36  
37  
38  
39  
40  
41  
42  
43  
44  
45  
46  
47  
48  
49  
50  
51  
52  
53  
54  
55  
56  
57  
58  
59  
60

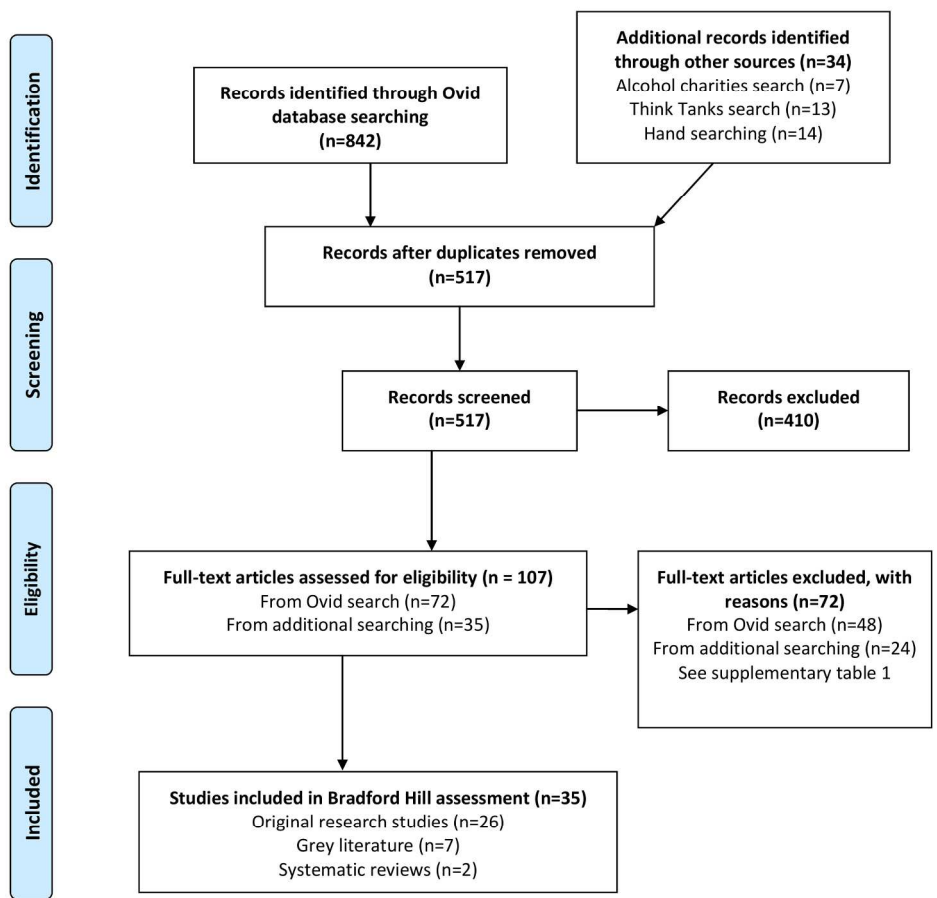

PRISMA flow diagram of studies in this systematic review

619x584mm (96 x 96 DPI)

only

1  
2  
3  
4  
5  
6  
7  
8  
9  
10  
11  
12  
13  
14  
15  
16  
17  
18  
19  
20  
21  
22  
23  
24  
25  
26  
27  
28  
29  
30  
31  
32  
33  
34  
35  
36  
37  
38  
39  
40  
41  
42  
43  
44  
45  
46  
47  
48  
49  
50  
51  
52  
53  
54  
55  
56  
57  
58  
59  
60

Figure 2: Areas of evidence for the effectiveness of minimum pricing of alcohol, with key examples

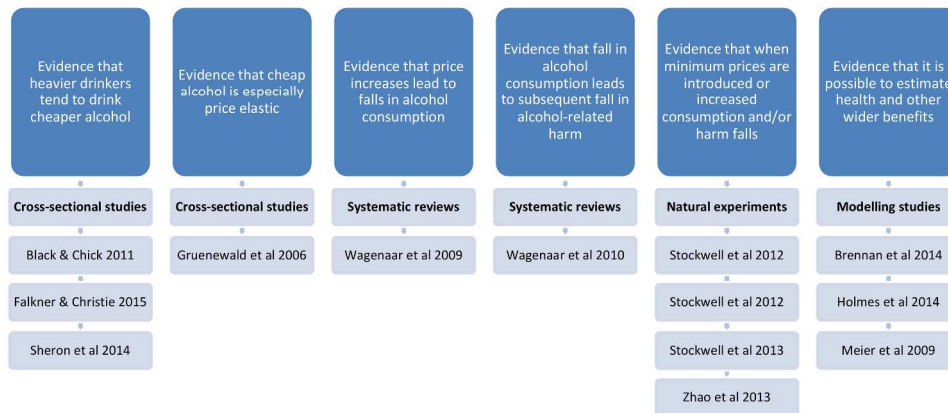

This model shows that different study types tended to produce evidence of effectiveness of minimum pricing in relation to different outcomes. Studies cited in the figure are key examples of the literature in that area and do not represent an exhaustive list.

784x438mm (96 x 96 DPI)

Review only



1  
2  
3  
4  
5  
6  
7  
8  
9  
10  
11  
12  
13  
14  
15  
16  
17  
18  
19  
20  
21  
22  
23  
24  
25  
26  
27  
28  
29  
30  
31  
32  
33  
34  
35  
36  
37  
38  
39  
40  
41  
42

### Online supplementary table: identified studies where full text assessed, then not included in review

| Source      | Author and year published | Study type                                                     | Reason excluded                                                                                                                     |
|-------------|---------------------------|----------------------------------------------------------------|-------------------------------------------------------------------------------------------------------------------------------------|
| Ovid search | Aage 2012 (1)             | Time series analysis                                           | Affordability, not price                                                                                                            |
|             | Ayyagari 2013 (2)         | Econometric analysis of price and consumption data             | Price elasticities of demand only                                                                                                   |
|             | Bellis 2009 (3)           | Cross-sectional surveys                                        | Association between drink type and price, and drink type and harms, but not directly reported in paper                              |
|             | Bennetts 2008 (4)         | Review (not systematic)                                        | Review of a report (not a research study)                                                                                           |
|             | Burton 2016 (5)           | Rapid evidence review (not systematic)                         | Review of effectiveness and cost-effectiveness of range of policy options (including MUP), not systematic                           |
|             | Callinan 2015 (6)         | Editorial (not a research study)                               | Editorial about different pricing, taxation and affordability measures, not a research study                                        |
|             | Casswell 2014 (7)         | Cross-sectional survey                                         | Studies price paid for alcohol, but not in relation to a proposed minimum price (price simply dichotomised into either high or low) |
|             | Chalmers 2013 (8)         | Commentary (not a research study)                              | Is a commentary about challenges to MUP e.g. industry and the law                                                                   |
|             | Chaloupka 2002 (9)        | Review (not systematic)                                        | Review of previous economic studies (not systematic)                                                                                |
|             | Chick 2012 (10)           | Editorial (not a research study)                               | Is about bans on multi-buys, not minimum price                                                                                      |
|             | Cook 2014 (11)            | Analysis of cross-sectional survey data and alcohol policies   | Affordability not price (GDP PPP)                                                                                                   |
|             | Duffy 1981 (12)           | Econometric time series analysis                               | Talks about elasticities in relation to duty rises not MUP. NB is M duffy, not J duffy                                              |
|             | Giesbrecht 2003 (13)      | Review (not systematic)                                        | Review of previous studies (not systematic)                                                                                         |
|             | Giesbrecht 2015 (14)      | Policy analysis                                                | Does not relate price intervention to consumption or harm                                                                           |
|             | Giesbrecht 2016 (15)      | Comparison of alcohol policies in different Canadian provinces | Does not relate different prices to different outcomes in terms of consumption or harm                                              |

|    |                                  |                                                                                         |                                                                                                          |
|----|----------------------------------|-----------------------------------------------------------------------------------------|----------------------------------------------------------------------------------------------------------|
| 1  | Gilligan 2012 (16)               | Cross-sectional survey and policy analysis                                              | Price changes, not minimum prices                                                                        |
| 2  | Grossman 2004 (17)               | Economic analysis                                                                       | Tax (federal excise tax increase) not MUP                                                                |
| 3  | Hadland 2015 (18)                | Policy analysis                                                                         | Effects of numerous alcohol policies considered together                                                 |
| 4  | Heeb 2003 (19)                   | Natural experiment: longitudinal survey 3 months before and 3 months after price change | Tax, not price intervention                                                                              |
| 5  | Hogan 2006 (20)                  | Natural experiment/evaluation                                                           | Tax, not price intervention                                                                              |
| 6  | Jónsson 2013 (21)                | Cross-sectional surveys and routine data                                                | Policies included tax and other supply side policies, but not MUP                                        |
| 7  | Katikireddi 2012 (22)            | Commentary (not a research study)                                                       | Is a commentary about legal considerations of MUP, not effectiveness                                     |
| 8  | Katikireddi 2014 (23)            | Qualitative study                                                                       | Stakeholder views of MUP, not effectiveness                                                              |
| 9  | Khaltourina 2015 (24)            | Cross-sectional surveys and routine data                                                | Tax, not price intervention                                                                              |
| 10 | Knibbe 2014 (25)                 | Analysis of cross-sectional survey data and alcohol policies                            | No price intervention studied, price investigated more as a covariate                                    |
| 11 | Lindeman 2013 (26)               | Cross-sectional surveys and routine data                                                | Tax, not price intervention                                                                              |
| 12 | Lonsdale 2012 (27)               | Qualitative study                                                                       | Public opinion of policy, nothing about effectiveness                                                    |
| 13 | Mäkelä 2009 (28)                 | Review (not systematic) and analysis of routine data                                    | Tax, not price intervention                                                                              |
| 14 | McCambridge 2014 (29)            | Document analysis and qualitative interviews                                            | Corporate lobbying, not the effectiveness of MUP                                                         |
| 15 | Meng 2014 (30)                   | Econometric analysis using pseudo panel                                                 | Price elasticities of demand only                                                                        |
| 16 | Nelson 2013 (31)                 | Review (not systematic)                                                                 | Conflict of interest (funded by International Center for Alcohol Policies).                              |
| 17 | Nelson 2014 (affordability) (32) | Analysis of routine data and economic modelling                                         | Affordability not price, and conflict of interest (funded by International Center for Alcohol Policies). |
| 18 | Nelson 2014 (elasticities) (33)  | Economic modelling                                                                      | Conflict of interest (funded by International Center for Alcohol Policies).                              |

|                  |                                |                                                              |                                                                                                              |
|------------------|--------------------------------|--------------------------------------------------------------|--------------------------------------------------------------------------------------------------------------|
|                  | Nelson 2014 (gender) (34)      | Systematic review                                            | Conflict of interest (funded by International Center for Alcohol Policies).                                  |
|                  | Nelson & McNall 2016 (35)      | Review (not systematic)                                      | Conflict of interest (funded by International Alliance for Responsible Drinking)                             |
|                  | Nicholls & Greenaway 2015 (36) | Policy analysis                                              | Is about policy framing, not the effectiveness of MUP                                                        |
|                  | Record 2009 (37)               | Modelling study                                              | Conflict of interest – both authors were members of the Alcohol Health Alliance which is campaigning for MUP |
|                  | Rush 1986 (38)                 | Analysis of routine data                                     | Affordability, not price                                                                                     |
|                  | Shi 2011 (39)                  | Econometric analysis of price and consumption data           | Price elasticities of demand only                                                                            |
|                  | Skov 2011 (40)                 | Natural experiment                                           | Tax, not price intervention                                                                                  |
|                  | Sloan 1994 (41)                | Analysis of routine data 1982-1988                           | Price changes, not minimum prices                                                                            |
|                  | Stockwell 2012 (42)            | Letter to journal (not a research study)                     | Letter concerning homelessness and price paid for alcohol                                                    |
|                  | Stockwell 2013 (43)            | Letter to journal (not a research study)                     | Letter to editor about UK industry criticism of Canadian research on MUP, not a research study               |
|                  | Sutton & Godfrey 1995 (44)     | Cross-sectional survey                                       | Price changes, not minimum prices                                                                            |
|                  | Tian 2011 (45)                 | Econometric analysis of price and consumption data           | Price elasticities of demand only                                                                            |
|                  | Wall & Casswell 2013 (46)      | Time series analysis and econometric modelling               | Price changes, not minimum prices                                                                            |
|                  | Xuan 2015 (47)                 | Analysis of cross-sectional survey data and alcohol policies | Price and tax considered together                                                                            |
|                  | Yashkin 2013 (48)              | Econometric analysis of price and consumption data           | Price elasticities of demand only                                                                            |
| Hand searching & | Ally 2014 (49)                 | Analysis of VAT and price data                               | Tax, not price intervention                                                                                  |
|                  | Anderson 2009 (50)             | Lancet 'Series' article – a                                  | Not an original research study.                                                                              |

|    |            |                              |                                                             |
|----|------------|------------------------------|-------------------------------------------------------------|
| 1  |            |                              |                                                             |
| 2  |            |                              |                                                             |
| 3  |            |                              |                                                             |
| 4  | grey       | commentary/review            |                                                             |
| 5  | literature | Byrnes 2013 (51)             | Repeated cross-sectional survey                             |
| 6  |            | Centre for Economics and     | Report (not a research study)                               |
| 7  |            | Business Research 2010       |                                                             |
| 8  |            | (52)                         | Conflict of interest (funded by SAB Miller). Is a critique  |
| 9  |            |                              | of Sheffield modelling, not a research study.               |
| 10 |            | Craven 2013 (53)             | Economic report                                             |
| 11 |            |                              | Published in the journal of the Institute of Economic       |
| 12 |            |                              | Affairs, which has a conflict of interest.                  |
| 13 |            | Duffy & Snowdon 2012 (54)    | Report chapters (not a research study)                      |
| 14 |            |                              | Is a critique of Sheffield modelling, not a research study. |
| 15 |            | Fitzgerald & Angus 2015      | Report (not a research study)                               |
| 16 |            | (55)                         | Is a report about use of evidence in policymaking, not      |
| 17 |            |                              | about effectiveness of MUP. Also not a research study.      |
| 18 |            | Gallet 2007 (56)             | Meta-analysis                                               |
| 19 |            |                              | Is looking at elasticities of demand for alcohol, not the   |
| 20 |            |                              | effectiveness of MUP.                                       |
| 21 |            | Gray 2000 (57)               | Natural experiment                                          |
| 22 |            |                              | Restrictions do not include any price interventions         |
| 23 |            | Gruenewald 2006 (58)         | Time series analysis/modelling                              |
| 24 |            |                              | Price changes, not minimum prices, but included in          |
| 25 |            |                              | narrative                                                   |
| 26 |            | Hilton 2014 (59)             | Content analysis of UK newsprint                            |
| 27 |            |                              | Media representations of MUP, not effectiveness             |
| 28 |            | Home Office 2011 (60)        | 'Summary review'/report (not a research                     |
| 29 |            |                              | study)                                                      |
| 30 |            |                              | Replicates what we have elsewhere, but in less detail.      |
| 31 |            |                              | Also not a research study.                                  |
| 32 |            | Institute for Fiscal Studies | Report (not a research study)                               |
| 33 |            | 2011 (61)                    |                                                             |
| 34 |            |                              | Is not about effectiveness of MUP                           |
| 35 |            | Institute for Fiscal Studies | Report (not a research study)                               |
| 36 |            | 2013 (62)                    |                                                             |
| 37 |            |                              | Is not looking at effectiveness of MUP, is comparing        |
| 38 |            |                              | Govt and industry revenue under MUP and higher tax          |
| 39 |            | Institute of Alcohol Studies | Webpage                                                     |
| 40 |            | (Goodliffe) 2014 (63)        |                                                             |
| 41 |            |                              | Is discussing legal issues, not effectiveness of MUP        |
| 42 |            | Kisely & Lawence 2015 (64)   | Natural experiment                                          |
| 43 |            |                              | Tax, not price intervention                                 |
| 44 |            | Ludbrook 2010 (65)           | Secondary analysis of Expenditure and                       |
| 45 |            |                              | Food Survey                                                 |
| 46 |            |                              | Describes purchasing patterns of low price alcohol in       |
| 47 |            |                              | Scotland. Not about MUP.                                    |
|    |            | Ornstein 1983 (66)           | Literature review book chapter (not                         |
|    |            |                              | systematic)                                                 |
|    |            |                              | Price elasticities of demand only                           |

|                                              |                                          |                                                                                                                            |
|----------------------------------------------|------------------------------------------|----------------------------------------------------------------------------------------------------------------------------|
| Rabinovch 2012 (67)                          | Technical report (contains data)         | Does not assess effectiveness of MUP                                                                                       |
| Radaev 2015 (68)                             | Time series analysis                     | Paper explored the effect of price interventions on consumption of homemade alcohol, not the effectiveness of MUP          |
| Robinson 2013 (69)                           | Letter to journal (not a research study) | Letter to editor about evidence for MUP, not a research study                                                              |
| Snowdon 2015 (70)                            | Book chapter                             | Is a critique of Sheffield modelling, not a research study. Institute of Economic Affairs also has a conflict of interest. |
| Wine and Spirits Trade Association n.d. (71) | Press release                            | Press release critiquing Zhao 2013 paper, not a research study                                                             |
| World Health Organisation 2014 (72)          | Report                                   | Does not discuss effectiveness of MUP                                                                                      |

## References

1. Aage H. Alcohol in Greenland 1951–2010: consumption, mortality, prices. *Int J Circumpolar Health* [Internet]. 2012 Dec 17 [cited 2016 Feb 27];71. Available from: <http://www.ncbi.nlm.nih.gov/pmc/articles/PMC3525923/>
2. Ayyagari P, Deb P, Fletcher J, Gallo W, Sindelar JL. Understanding heterogeneity in price elasticities in the demand for alcohol for older individuals. *Health Econ*. 2013 Jan;22(1):89–105.
3. Bellis MA, Phillips-Howard PA, Hughes K, Hughes S, Cook PA, Morleo M, et al. Teenage drinking, alcohol availability and pricing: a cross-sectional study of risk and protective factors for alcohol-related harms in school children. *BMC Public Health*. 2009 Oct 9;9(1):1–12.
4. Bennetts R, Russell Bennetts. Alcohol: Price, Policy and Public Health. *Alcohol Alcohol*. 2008 Mar 1;43(2):123–123.
5. Burton R, Henn C, Lavoie D, O'Connor R, Perkins C, Sweeney K, et al. A rapid evidence review of the effectiveness and cost-effectiveness of alcohol control policies: an English perspective. *The Lancet* [Internet]. 2016 Dec 2 [cited 2017 Feb 17];0(0). Available from: [http://www.thelancet.com/journals/lancet/article/PIIS0140-6736\(16\)32420-5/abstract](http://www.thelancet.com/journals/lancet/article/PIIS0140-6736(16)32420-5/abstract)
6. Callinan S, Room R, Dietze P. Alcohol Price Policies as an Instrument of Health Equity: Differential Effects of Tax and Minimum Price Measures. *Alcohol Alcohol Oxf Oxfs*. 2015 Nov;50(6):629–30.
7. Casswell S, Huckle T, Wall M, Yeh LC. International alcohol control study: pricing data and hours of purchase predict heavier drinking. *Alcohol Clin Exp Res*. 2014 May;38(5):1425–31.
8. Chalmers J, Carragher N, Davoren S, O'Brien P. Real or perceived impediments to minimum pricing of alcohol in Australia: Public opinion, the industry and the law. *Int J Drug Policy*. 2013 Nov;24(6):517–23.
9. Chaloupka FJ, Grossman M, Saffer H. The effects of price on alcohol consumption and alcohol-related problems. *Alcohol Res Health J Natl Inst Alcohol Abuse Alcohol*. 2002;26(1):22–34.
10. Chick J. 16 for the Price of 10: Effects of a Ban on Multi-Buy Alcohol. *Alcohol Alcohol*. 2012 Feb 22;47(2):83–83.
11. Cook WK, Bond J, Greenfield TK. Are alcohol policies associated with alcohol consumption in low- and middle-income countries? *Addict Abingdon Engl*. 2014 Jul;109(7):1081–90.
12. Duffy M. The influence of prices, consumer incomes and advertising upon the demand for alcoholic drink in the United Kingdom: an econometric study. *Alcohol Alcohol*. 1981 Sep 21;16(4):200–9.
13. Giesbrecht N, Greenfield TK. Preventing Alcohol-Related Problems in the US Through Policy: Media Campaigns, Regulatory Approaches and Environmental Interventions. *J Prim Prev*. 2003 Sep;24(1):63–104.

14. Giesbrecht N, Wettlaufer A, Thomas G, Stockwell T, Thompson K, April N, et al. Pricing of alcohol in Canada: A comparison of provincial policies and harm-reduction opportunities. *Drug Alcohol Rev.* 2015 Nov 4;
15. Giesbrecht N, Wettlaufer A, Thomas G, Stockwell T, Thompson K, April N, et al. Pricing of alcohol in Canada: A comparison of provincial policies and harm-reduction opportunities. *Drug Alcohol Rev.* 2016 May;35(3):289–97.
16. Gilligan C, Kuntsche E, Gmel G. Adolescent drinking patterns across countries: associations with alcohol policies. *Alcohol Alcohol Oxf Oxf.* 2012 Dec;47(6):732–7.
17. Grossman M. Individual Behaviors and Substance Use: The Role of Price [Internet]. National Bureau of Economic Research; 2004 Dec [cited 2016 Feb 27]. Report No.: 10948. Available from: <http://www.nber.org/papers/w10948>
18. Hadland SE, Xuan Z, Blanchette JG, Heeren TC, Swahn MH, Naimi TS. Alcohol Policies and Alcoholic Cirrhosis Mortality in the United States. *Prev Chronic Dis* [Internet]. 2015 Oct 15 [cited 2016 Feb 27];12. Available from: [http://www.cdc.gov/pcd/issues/2015/15\\_0200.htm](http://www.cdc.gov/pcd/issues/2015/15_0200.htm)
19. Heeb J-L, Gmel G, Zurbrügg C, Kuo M, Rehm J. Changes in alcohol consumption following a reduction in the price of spirits: a natural experiment in Switzerland. *Addict Abingdon Engl.* 2003 Oct;98(10):1433–46.
20. Hogan E, BOFFA J, ROSEWARNE C, BELL S, CHEE DA. What price do we pay to prevent alcohol-related harms in Aboriginal communities? The Alice Springs trial of liquor licensing restrictions. *Drug Alcohol Rev.* 2006;25(3):207–212.
21. Jónsson RM, Kristjánsson S. Alcohol policy and public opinion in Iceland, 1989–2012. *Nord Stud Alcohol Drugs.* 2013;30(6):539–549.
22. Katikireddi SV, McLean JA. Introducing a minimum unit price for alcohol in Scotland: considerations under European Law and the implications for European public health. *Eur J Public Health.* 2012 Aug 1;22(4):457–8.
23. Katikireddi SV, Bond L, Hilton S. Perspectives on econometric modelling to inform policy: a UK qualitative case study of minimum unit pricing of alcohol. *Eur J Public Health.* 2014 Jun 1;24(3):490–5.
24. Khaltourina D, Korotayev A. Effects of Specific Alcohol Control Policy Measures on Alcohol-Related Mortality in Russia from 1998 to 2013. *Alcohol Alcohol.* 2015 Sep 1;50(5):588–601.
25. Knibbe RA, Derickx M, Allamani A, Massini G. Alcohol Consumption and its Related Harms in the Netherlands Since 1960: Relationships With Planned and Unplanned Factors. *Subst Use Misuse.* 2014 Oct 15;49(12):1589–600.
26. Lindeman M, Karlsson T, Österberg E. Public opinions, alcohol consumption and policy changes in Finland, 1993–2013. *Nord Stud Alcohol Drugs.* 2013;30(6):507–524.



- 1  
2  
3  
4  
5  
6  
7  
8  
9  
10  
11  
12  
13  
14  
15  
16  
17  
18  
19  
20  
21  
22  
23  
24  
25  
26  
27  
28  
29  
30  
31  
32  
33  
34  
35  
36  
37  
38  
39  
40  
41  
42  
43  
44  
45  
46  
47  
48  
49  
50  
51  
52  
53  
54  
55  
56  
57  
58  
59  
60
27. Lonsdale AJ, Hardcastle SJ, Hagger MS. A minimum price per unit of alcohol: A focus group study to investigate public opinion concerning UK government proposals to introduce new price controls to curb alcohol consumption. *BMC Public Health*. 2012 Nov 23;12(1):1023.
28. Mäkelä P, Osterberg E. Weakening of one more alcohol control pillar: a review of the effects of the alcohol tax cuts in Finland in 2004. *Addict Abingdon Engl*. 2009 Apr;104(4):554–63.
29. McCambridge J, Hawkins B, Holden C. Vested Interests in Addiction Research and Policy. The challenge corporate lobbying poses to reducing society’s alcohol problems: insights from UK evidence on minimum unit pricing. *Addiction*. 2014 Feb 1;109(2):199–205.
30. Meng Y, Brennan A, Purshouse R, Hill-McManus D, Angus C, Holmes J, et al. Estimation of own and cross price elasticities of alcohol demand in the UK--A pseudo-panel approach using the Living Costs and Food Survey 2001-2009. *J Health Econ*. 2014 Mar;34:96–103.
31. Nelson JP. Does Heavy Drinking by Adults Respond to Higher Alcohol Prices and Taxes? A Survey and Assessment. *Econ Anal Policy*. 2013 Dec;43(3):265–91.
32. Nelson JP. Alcohol Affordability and Alcohol Demand: Cross-Country Trends and Panel Data Estimates, 1975 to 2008. *Alcohol Clin Exp Res*. 2014 Apr 1;38(4):1167–75.
33. Nelson JP. Estimating the Price Elasticity of Beer: Meta-Analysis of Data with Heterogeneity, Dependence, and Publication Bias [Internet]. Rochester, NY: Social Science Research Network; 2013 Jan [cited 2016 Feb 27]. Report No.: ID 2200492. Available from: <http://papers.ssrn.com/abstract=2200492>
34. Nelson JP. Gender differences in alcohol demand: a systematic review of the role of prices and taxes. *Health Econ*. 2014 Oct;23(10):1260–80.
35. Nelson JP, McNall AD. What happens to drinking when alcohol policy changes? A review of five natural experiments for alcohol taxes, prices, and availability. *Eur J Health Econ*. 2016 Apr 7;1–18.
36. Nicholls J, Greenaway J. What is the problem?: Evidence, politics and alcohol policy in England and Wales, 2010–2014. *Drugs Educ Prev Policy*. 2015 Mar 4;22(2):135–42.
37. Record C, Day C. Britain’s alcohol market: how minimum alcohol prices could stop moderate drinkers subsidising those drinking at hazardous and harmful levels. *Clin Med*. 2009 Oct 1;9(5):421–5.
38. Rush B, Steinberg M, Brook R. The relationships among alcohol availability, alcohol consumption and alcohol-related damage in the Province of Ontario and the State of Michigan 1955-1982. *Adv Alcohol Subst Abuse*. 1986;5(4):33–45.
39. Shi Y. Three Essays on Economics of Health Behavior in China [Internet]. 2011 [cited 2016 Mar 20]. Available from: [http://www.rand.org/pubs/rgs\\_dissertations/RGSD287.html](http://www.rand.org/pubs/rgs_dissertations/RGSD287.html)
40. Skov SJ, Chikritzhs TN, Kypri K, Miller PG, Hall WD, Daube MM, et al. Is the “alcopops” tax working? Probably yes but there is a bigger picture. *Med J Aust* [Internet]. 2011 [cited 2015 Nov



- 1  
2  
3  
4  
5  
6  
7  
8  
9  
10  
11  
12  
13  
14  
15  
16  
17  
18  
19  
20  
21  
22  
23  
24  
25  
26  
27  
28  
29  
30  
31  
32  
33  
34  
35  
36  
37  
38  
39  
40  
41  
42  
43  
44  
45  
46  
47  
48  
49  
50  
51  
52  
53  
54  
55  
56  
57  
58  
59  
60
- 9];195(2). Available from: <https://www.mja.com.au/journal/2011/195/2/alcopops-tax-working-probably-yes-there-bigger-picture>
41. Sloan FA, Reilly BA, Schenzler C. Effects of prices, civil and criminal sanctions, and law enforcement on alcohol-related mortality. *J Stud Alcohol*. 1994 Jul;55(4):454–65.
42. Stockwell T, Williams N, Pauly B. Working and waiting: Homeless drinkers responses to less affordable alcohol. *Drug Alcohol Rev*. 2012 Sep 1;31(6):823–4.
43. Stockwell T, Zhao J, Martin G, Macdonald S, Vallance K, Treno A, et al. Misleading UK alcohol industry criticism of Canadian research on minimum pricing. *Addiction*. 2013 Jun 1;108(6):1172–3.
44. Sutton M, Godfrey C. A grouped data regression approach to estimating economic and social influences on individual drinking behaviour. *Health Econ*. 1995 May 1;4(3):237–47.
45. Tian G, Liu F. Is the demand for alcoholic beverages in developing countries sensitive to price? Evidence from China. *Int J Environ Res Public Health*. 2011 Jun;8(6):2124–31.
46. Wall M, Casswell S. Affordability of alcohol as a key driver of alcohol demand in New Zealand: a co-integration analysis. *Addict Abingdon Engl*. 2013 Jan;108(1):72–9.
47. Xuan Z, Blanchette J, Nelson TF, Heeren T, Oussayef N, Naimi TS. The alcohol policy environment and policy subgroups as predictors of binge drinking measures among US adults. *Am J Public Health*. 2015 Apr;105(4):816–22.
48. Yashkin A. The Dynamics of Alcohol Consumption in the Russian Federation: Implications of Using Price Related Policies to Control Alcohol Use. *Grad Theses Diss [Internet]*. 2013 Jan 1; Available from: <http://scholarcommons.usf.edu/etd/4968>
49. Ally AK, Meng Y, Chakraborty R, Dobson PW, Seaton JS, Holmes J, et al. Alcohol tax pass-through across the product and price range: do retailers treat cheap alcohol differently? *Addiction*. 2014 Dec 1;109(12):1994–2002.
50. Anderson P, Chisholm D, Fuhr DC. Effectiveness and cost-effectiveness of policies and programmes to reduce the harm caused by alcohol. *Lancet Lond Engl*. 2009 Jun 27;373(9682):2234–46.
51. Byrnes J, Shakeshaft A, Petrie D, Doran C. Can harms associated with high-intensity drinking be reduced by increasing the price of alcohol? *Drug Alcohol Rev*. 2013 Jan;32(1):27–30.
52. Centre for Economics and Business Research. Minimum Alcohol Pricing: A targeted measure? Report to the Scottish Parliamentary Health and Sport Committee [Internet]. London; 2010 Aug. Available from: <http://www.ias.org.uk/uploads/pdf/Price%20docs/Updated-Sheffield-Scotland-v2-August-20103.pdf>
53. Craven BM, Marlow ML, Shiers AF. The Economics of Minimum Pricing for Alcohol. *Econ Aff*. 2013 Jun 1;33(2):174–89.

- 1  
2  
3  
4  
5  
6  
7  
8  
9  
10  
11  
12  
13  
14  
15  
16  
17  
18  
19  
20  
21  
22  
23  
24  
25  
26  
27  
28  
29  
30  
31  
32  
33  
34  
35  
36  
37  
38  
39  
40  
41  
42  
43  
44  
45  
46  
47  
48  
49  
50  
51  
52  
53  
54  
55  
56  
57  
58  
59  
60
54. Duffy J, Snowdon C. The minimal evidence for minimum pricing [Internet]. Adam Smith Institute; Available from: [http://www.adamsmith.org/sites/default/files/research/files/ASI\\_SAPM.pdf](http://www.adamsmith.org/sites/default/files/research/files/ASI_SAPM.pdf)
55. Fitzgerald N, Angus C. Four Nations: How Evidence-based are Alcohol Policies and Programmes across the UK?. London: [Internet]. London: Alliance for Useful Evidence/Alcohol Health Alliance.; 2015. Available from: <http://www.alliance4usefulevidence.org/assets/Four-Nations-v3.pdf>
56. Gallet CA. The Demand for Alcohol: A Meta-Analysis of Elasticities [Internet]. Rochester, NY: Social Science Research Network; 2007 May [cited 2016 Jan 6]. Report No.: ID 985689. Available from: <http://papers.ssrn.com/abstract=985689>
57. Gray D, Siggers S, Atkinson D, Sputore B, Bourbon D. Beating the grog: an evaluation of the Tennant Creek liquor licensing restrictions. *Aust N Z J Public Health*. 2000 Feb;24(1):39–44.
58. Gruenewald PJ, Ponicki WR, Holder HD, Romelsjö A. Alcohol prices, beverage quality, and the demand for alcohol: quality substitutions and price elasticities. *Alcohol Clin Exp Res*. 2006 Jan;30(1):96–105.
59. Hilton S, Wood K, Patterson C, Katikireddi SV. Implications for alcohol minimum unit pricing advocacy: What can we learn for public health from UK newsprint coverage of key claim-makers in the policy debate? *Soc Sci Med*. 2014 Feb;102:157–64.
60. Home Office. The likely impacts of increasing alcohol price: a summary review of the evidence base [Internet]. 2011 Jan. Available from: [https://www.gov.uk/government/uploads/system/uploads/attachment\\_data/file/98100/impacts-alcohol-price-review.pdf](https://www.gov.uk/government/uploads/system/uploads/attachment_data/file/98100/impacts-alcohol-price-review.pdf)
61. Institute for Fiscal Studies. Alcohol pricing and taxation policies. IFS Briefing Note BN124. 2011.
62. Institute for Fiscal Studies. Price-based measures to reduce alcohol consumption. IFS Briefing Note BN138. 2013.
63. Goodliffe J. Applying a minimum price to alcohol (Institute of Alcohol Studies) [Internet]. 2014. Available from: <http://www.ias.org.uk/What-we-do/Publication-archive/Alcohol-Alert/October-2014/Applying-a-minimum-price-to-alcohol.aspx>
64. Kisely S, Lawrence D. A time series analysis of alcohol-related presentations to emergency departments in Queensland following the increase in alcopops tax. *J Epidemiol Community Health*. 2015 Sep 16;jech-2015-205666.
65. Ludbrook A. Purchasing Patterns for Low Price Off Sales Alcohol: Evidence from the Expenditure and Food Survey [Internet]. Available from: <http://www.shaap.org.uk/images/UserFiles/File/Reports%20and%20Briefings/Briefing%20-%20Purchase%20of%20low-price%20alcohol%20analysis.pdf>
66. Ornstein SI, Levy D. Price and Income Elasticities of Demand for Alcoholic Beverages. In: Galanter M, Begleiter H, Cicero T, Deitrich R, Goodwin DW, Gottheil E, et al., editors. *Genetics Online supplementary file to Boniface S, Scannell JW, Marlow S: Evidence for the effectiveness of minimum pricing of alcohol: a systematic review and assessment using the Bradford Hill criteria for causality*

- 1  
2  
3 Behavioral Treatment Social Mediators and Prevention Current Concepts in Diagnosis [Internet].  
4 Boston, MA: Springer US; 1983. p. 303–45. Available from: [http://dx.doi.org/10.1007/978-1-4613-](http://dx.doi.org/10.1007/978-1-4613-3617-4_18)  
5 [3617-4\\_18](http://dx.doi.org/10.1007/978-1-4613-3617-4_18)  
6  
7  
8 67. Rabinovich L, Brutscher P-B, de Vries H, Tiessen J, Clift J, Reding A. The affordability of  
9 alcoholic beverages in the European Union. 2012;  
10  
11 68. Radaev V. Impact of a New Alcohol Policy on Homemade Alcohol Consumption and Sales in  
12 Russia. *Alcohol Alcohol*. 2015 May 1;50(3):365–72.  
13  
14  
15 69. Robinson M, McCartney G, Beeston C. What is convincing evidence on alcohol pricing? *BMJ*.  
16 2013 Aug 20;347:f5102.  
17  
18  
19 70. Snowdon C. Chapter 10. Minimum unit pricing. In: *Flaws and Ceilings: Price controls and the*  
20 *damage they cause* [Internet]. [cited 2015 Nov 9]. p. 177–97. Available from:  
21 [http://www.iea.org.uk/publications/research/flaws-and-ceilings-price-controls-and-the-damage-](http://www.iea.org.uk/publications/research/flaws-and-ceilings-price-controls-and-the-damage-they-cause)  
22 [they-cause](http://www.iea.org.uk/publications/research/flaws-and-ceilings-price-controls-and-the-damage-they-cause)  
23  
24  
25 71. Wine and Spirits Trade Association. New claims that increasing the cost of alcohol saves lives  
26 are misleading [Internet]. Available from: [http://www.wsta.co.uk/press/634-new-claims-that-](http://www.wsta.co.uk/press/634-new-claims-that-increasing-the-cost-of-alcohol-saves-lives-are-misleading)  
27 [increasing-the-cost-of-alcohol-saves-lives-are-misleading](http://www.wsta.co.uk/press/634-new-claims-that-increasing-the-cost-of-alcohol-saves-lives-are-misleading)  
28  
29  
30 72. World Health Organization. European status report on alcohol and health 2014. Pricing  
31 policies [Internet]. World Health Organization; 2014. Available from:  
32 [http://www.euro.who.int/\\_\\_data/assets/pdf\\_file/0003/244902/Pricing-policies.pdf](http://www.euro.who.int/__data/assets/pdf_file/0003/244902/Pricing-policies.pdf)  
33  
34  
35  
36  
37  
38  
39  
40  
41  
42  
43  
44  
45  
46  
47  
48  
49  
50  
51  
52  
53  
54  
55  
56  
57  
58  
59  
60

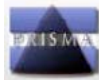

# PRISMA 2009 Checklist

| Section/topic                      | #  | Checklist item                                                                                                                                                                                                                                                                                              | Reported on page #                           |
|------------------------------------|----|-------------------------------------------------------------------------------------------------------------------------------------------------------------------------------------------------------------------------------------------------------------------------------------------------------------|----------------------------------------------|
| <b>TITLE</b>                       |    |                                                                                                                                                                                                                                                                                                             |                                              |
| Title                              | 1  | Identify the report as a systematic review, meta-analysis, or both.                                                                                                                                                                                                                                         | 1                                            |
| <b>ABSTRACT</b>                    |    |                                                                                                                                                                                                                                                                                                             |                                              |
| Structured summary                 | 2  | Provide a structured summary including, as applicable: background; objectives; data sources; study eligibility criteria, participants, and interventions; study appraisal and synthesis methods; results; limitations; conclusions and implications of key findings; systematic review registration number. | 2                                            |
| <b>INTRODUCTION</b>                |    |                                                                                                                                                                                                                                                                                                             |                                              |
| Rationale                          | 3  | Describe the rationale for the review in the context of what is already known.                                                                                                                                                                                                                              | 3-4                                          |
| Objectives                         | 4  | Provide an explicit statement of questions being addressed with reference to participants, interventions, comparisons, outcomes, and study design (PICOS).                                                                                                                                                  | 4                                            |
| <b>METHODS</b>                     |    |                                                                                                                                                                                                                                                                                                             |                                              |
| Protocol and registration          | 5  | Indicate if a review protocol exists, if and where it can be accessed (e.g., Web address), and, if available, provide registration information including registration number.                                                                                                                               | no published protocol                        |
| Eligibility criteria               | 6  | Specify study characteristics (e.g., PICOS, length of follow-up) and report characteristics (e.g., years considered, language, publication status) used as criteria for eligibility, giving rationale.                                                                                                      | 4                                            |
| Information sources                | 7  | Describe all information sources (e.g., databases with dates of coverage, contact with study authors to identify additional studies) in the search and date last searched.                                                                                                                                  | 4                                            |
| Search                             | 8  | Present full electronic search strategy for at least one database, including any limits used, such that it could be repeated.                                                                                                                                                                               | 4                                            |
| Study selection                    | 9  | State the process for selecting studies (i.e., screening, eligibility, included in systematic review, and, if applicable, included in the meta-analysis).                                                                                                                                                   | 4-6                                          |
| Data collection process            | 10 | Describe method of data extraction from reports (e.g., piloted forms, independently, in duplicate) and any processes for obtaining and confirming data from investigators.                                                                                                                                  | 4-6                                          |
| Data items                         | 11 | List and define all variables for which data were sought (e.g., PICOS, funding sources) and any assumptions and simplifications made.                                                                                                                                                                       | Tables 2+3                                   |
| Risk of bias in individual studies | 12 | Describe methods used for assessing risk of bias of individual studies (including specification of whether this was done at the study or outcome level), and how this information is to be used in any data synthesis.                                                                                      | 4                                            |
| Summary measures                   | 13 | State the principal summary measures (e.g., risk ratio, difference in means).                                                                                                                                                                                                                               | Not stated, as all summary measures included |
| Synthesis of results               | 14 | Describe the methods of handling data and combining results of studies, if done, including measures of consistency (e.g., $I^2$ ) for each meta-analysis.                                                                                                                                                   | 4, and Table 1                               |



# PRISMA 2009 Checklist

| Section/topic                 | #  | Checklist item                                                                                                                                                                                           | Reported on page #                     |
|-------------------------------|----|----------------------------------------------------------------------------------------------------------------------------------------------------------------------------------------------------------|----------------------------------------|
| Risk of bias across studies   | 15 | Specify any assessment of risk of bias that may affect the cumulative evidence (e.g., publication bias, selective reporting within studies).                                                             | 4                                      |
| Additional analyses           | 16 | Describe methods of additional analyses (e.g., sensitivity or subgroup analyses, meta-regression), if done, indicating which were pre-specified.                                                         | 4                                      |
| <b>RESULTS</b>                |    |                                                                                                                                                                                                          |                                        |
| Study selection               | 17 | Give numbers of studies screened, assessed for eligibility, and included in the review, with reasons for exclusions at each stage, ideally with a flow diagram.                                          | Figure 1 and online supplementary file |
| Study characteristics         | 18 | For each study, present characteristics for which data were extracted (e.g., study size, PICOS, follow-up period) and provide the citations.                                                             | Tables 2+3                             |
| Risk of bias within studies   | 19 | Present data on risk of bias of each study and, if available, any outcome level assessment (see item 12).                                                                                                | Tables 2+3                             |
| Results of individual studies | 20 | For all outcomes considered (benefits or harms), present, for each study: (a) simple summary data for each intervention group (b) effect estimates and confidence intervals, ideally with a forest plot. | Tables 2+3, +p18-20                    |
| Synthesis of results          | 21 | Present results of each meta-analysis done, including confidence intervals and measures of consistency.                                                                                                  | No meta-analysis, discussed p18-20     |
| Risk of bias across studies   | 22 | Present results of any assessment of risk of bias across studies (see Item 15).                                                                                                                          | discussed p21                          |
| Additional analysis           | 23 | Give results of additional analyses, if done (e.g., sensitivity or subgroup analyses, meta-regression [see Item 16]).                                                                                    | 18-20                                  |
| <b>DISCUSSION</b>             |    |                                                                                                                                                                                                          |                                        |
| Summary of evidence           | 24 | Summarize the main findings including the strength of evidence for each main outcome; consider their relevance to key groups (e.g., healthcare providers, users, and policy makers).                     | 20-21                                  |
| Limitations                   | 25 | Discuss limitations at study and outcome level (e.g., risk of bias), and at review-level (e.g., incomplete retrieval of identified research, reporting bias).                                            | 20-21                                  |
| Conclusions                   | 26 | Provide a general interpretation of the results in the context of other evidence, and implications for future research.                                                                                  | 21-22                                  |
| <b>FUNDING</b>                |    |                                                                                                                                                                                                          |                                        |
| Funding                       | 27 | Describe sources of funding for the systematic review and other support (e.g., supply of data); role of funders for the systematic review.                                                               | 22                                     |

From: Moher D, Liberati A, Tetzlaff J, Altman DG, The PRISMA Group (2009). Preferred Reporting Items for Systematic Reviews and Meta-Analyses: The PRISMA Statement. PLoS Med 6(7): e1000097. doi:10.1371/journal.pmed1000097

For more information, visit: [www.prisma-statement.org](http://www.prisma-statement.org).
