# Supplementary material for: Evidence for the effectiveness of minimum pricing of alcohol: a systematic review and assessment using the Bradford Hill criteria for causality
Source: PubMed Central journal article supplement (PMC5777460; doi:10.1136/bmjopen-2016-013497), 2017-06-06
Supplement: bmjopen-2016-013497supp001.pdf [file bmjopen-2016-013497supp001.pdf]

### Online supplementary table: identified studies where full text assessed, then not included in review

| Source      | Author and year published | Study type                                                     | Reason excluded                                                                                                                     |
|-------------|---------------------------|----------------------------------------------------------------|-------------------------------------------------------------------------------------------------------------------------------------|
| Ovid search | Aage 2012 (1)             | Time series analysis                                           | Affordability, not price                                                                                                            |
|             | Ayyagari 2013 (2)         | Econometric analysis of price and consumption data             | Price elasticities of demand only                                                                                                   |
|             | Bellis 2009 (3)           | Cross-sectional surveys                                        | Association between drink type and price, and drink type and harms, but not directly reported in paper                              |
|             | Bennetts 2008 (4)         | Review (not systematic)                                        | Review of a report (not a research study)                                                                                           |
|             | Burton 2016 (5)           | Rapid evidence review (not systematic)                         | Review of effectiveness and cost-effectiveness of range of policy options (including MUP), not systematic                           |
|             | Callinan 2015 (6)         | Editorial (not a research study)                               | Editorial about different pricing, taxation and affordability measures, not a research study                                        |
|             | Casswell 2014 (7)         | Cross-sectional survey                                         | Studies price paid for alcohol, but not in relation to a proposed minimum price (price simply dichotomised into either high or low) |
|             | Chalmers 2013 (8)         | Commentary (not a research study)                              | Is a commentary about challenges to MUP e.g. industry and the law                                                                   |
|             | Chaloupka 2002 (9)        | Review (not systematic)                                        | Review of previous economic studies (not systematic)                                                                                |
|             | Chick 2012 (10)           | Editorial (not a research study)                               | Is about bans on multi-buys, not minimum price                                                                                      |
|             | Cook 2014 (11)            | Analysis of cross-sectional survey data and alcohol policies   | Affordability not price (GDP PPP)                                                                                                   |
|             | Duffy 1981 (12)           | Econometric time series analysis                               | Talks about elasticities in relation to duty rises not MUP. NB is M duffy, not J duffy                                              |
|             | Giesbrecht 2003 (13)      | Review (not systematic)                                        | Review of previous studies (not systematic)                                                                                         |
|             | Giesbrecht 2015 (14)      | Policy analysis                                                | Does not relate price intervention to consumption or harm                                                                           |
|             | Giesbrecht 2016 (15)      | Comparison of alcohol policies in different Canadian provinces | Does not relate different prices to different outcomes in terms of consumption or harm                                              |

|                                  |                                                                                         |                                                                                                          |
|----------------------------------|-----------------------------------------------------------------------------------------|----------------------------------------------------------------------------------------------------------|
| Gilligan 2012 (16)               | Cross-sectional survey and policy analysis                                              | Price changes, not minimum prices                                                                        |
| Grossman 2004 (17)               | Economic analysis                                                                       | Tax (federal excise tax increase) not MUP                                                                |
| Hadland 2015 (18)                | Policy analysis                                                                         | Effects of numerous alcohol policies considered together                                                 |
| Heeb 2003 (19)                   | Natural experiment: longitudinal survey 3 months before and 3 months after price change | Tax, not price intervention                                                                              |
| Hogan 2006 (20)                  | Natural experiment/evaluation                                                           | Tax, not price intervention                                                                              |
| Jónsson 2013 (21)                | Cross-sectional surveys and routine data                                                | Policies included tax and other supply side policies, but not MUP                                        |
| Katikireddi 2012 (22)            | Commentary (not a research study)                                                       | Is a commentary about legal considerations of MUP, not effectiveness                                     |
| Katikireddi 2014 (23)            | Qualitative study                                                                       | Stakeholder views of MUP, not effectiveness                                                              |
| Khaltourina 2015 (24)            | Cross-sectional surveys and routine data                                                | Tax, not price intervention                                                                              |
| Knibbe 2014 (25)                 | Analysis of cross-sectional survey data and alcohol policies                            | No price intervention studied, price investigated more as a covariate                                    |
| Lindeman 2013 (26)               | Cross-sectional surveys and routine data                                                | Tax, not price intervention                                                                              |
| Lonsdale 2012 (27)               | Qualitative study                                                                       | Public opinion of policy, nothing about effectiveness                                                    |
| Mäkelä 2009 (28)                 | Review (not systematic) and analysis of routine data                                    | Tax, not price intervention                                                                              |
| McCambridge 2014 (29)            | Document analysis and qualitative interviews                                            | Corporate lobbying, not the effectiveness of MUP                                                         |
| Meng 2014 (30)                   | Econometric analysis using pseudo panel                                                 | Price elasticities of demand only                                                                        |
| Nelson 2013 (31)                 | Review (not systematic)                                                                 | Conflict of interest (funded by International Center for Alcohol Policies).                              |
| Nelson 2014 (affordability) (32) | Analysis of routine data and economic modelling                                         | Affordability not price, and conflict of interest (funded by International Center for Alcohol Policies). |
| Nelson 2014 (elasticities) (33)  | Economic modelling                                                                      | Conflict of interest (funded by International Center for Alcohol Policies).                              |

|                  |                                |                                                              |                                                                                                              |
|------------------|--------------------------------|--------------------------------------------------------------|--------------------------------------------------------------------------------------------------------------|
|                  | Nelson 2014 (gender) (34)      | Systematic review                                            | Conflict of interest (funded by International Center for Alcohol Policies).                                  |
|                  | Nelson & McNall 2016 (35)      | Review (not systematic)                                      | Conflict of interest (funded by International Alliance for Responsible Drinking)                             |
|                  | Nicholls & Greenaway 2015 (36) | Policy analysis                                              | Is about policy framing, not the effectiveness of MUP                                                        |
|                  | Record 2009 (37)               | Modelling study                                              | Conflict of interest – both authors were members of the Alcohol Health Alliance which is campaigning for MUP |
|                  | Rush 1986 (38)                 | Analysis of routine data                                     | Affordability, not price                                                                                     |
|                  | Shi 2011 (39)                  | Econometric analysis of price and consumption data           | Price elasticities of demand only                                                                            |
|                  | Skov 2011 (40)                 | Natural experiment                                           | Tax, not price intervention                                                                                  |
|                  | Sloan 1994 (41)                | Analysis of routine data 1982-1988                           | Price changes, not minimum prices                                                                            |
|                  | Stockwell 2012 (42)            | Letter to journal (not a research study)                     | Letter concerning homelessness and price paid for alcohol                                                    |
|                  | Stockwell 2013 (43)            | Letter to journal (not a research study)                     | Letter to editor about UK industry criticism of Canadian research on MUP, not a research study               |
|                  | Sutton & Godfrey 1995 (44)     | Cross-sectional survey                                       | Price changes, not minimum prices                                                                            |
|                  | Tian 2011 (45)                 | Econometric analysis of price and consumption data           | Price elasticities of demand only                                                                            |
|                  | Wall & Casswell 2013 (46)      | Time series analysis and econometric modelling               | Price changes, not minimum prices                                                                            |
|                  | Xuan 2015 (47)                 | Analysis of cross-sectional survey data and alcohol policies | Price and tax considered together                                                                            |
|                  | Yashkin 2013 (48)              | Econometric analysis of price and consumption data           | Price elasticities of demand only                                                                            |
| Hand searching & | Ally 2014 (49)                 | Analysis of VAT and price data                               | Tax, not price intervention                                                                                  |
|                  | Anderson 2009 (50)             | Lancet 'Series' article – a                                  | Not an original research study.                                                                              |

|                    |                                                      |                                                                                |                                                                                                               |
|--------------------|------------------------------------------------------|--------------------------------------------------------------------------------|---------------------------------------------------------------------------------------------------------------|
| grey literature    |                                                      | commentary/review                                                              |                                                                                                               |
|                    | Byrnes 2013 (51)                                     | Repeated cross-sectional survey                                                | Price changes, not minimum prices                                                                             |
|                    | Centre for Economics and Business Research 2010 (52) | Report (not a research study)                                                  | Conflict of interest (funded by SAB Miller). Is a critique of Sheffield modelling, not a research study.      |
|                    | Craven 2013 (53)                                     | Economic report                                                                | Published in the journal of the Institute of Economic Affairs, which has a conflict of interest.              |
|                    | Duffy & Snowdon 2012 (54)                            | Report chapters (not a research study)                                         | Is a critique of Sheffield modelling, not a research study.                                                   |
|                    | Fitzgerald & Angus 2015 (55)                         | Report (not a research study)                                                  | Is a report about use of evidence in policymaking, not about effectiveness of MUP. Also not a research study. |
|                    | Gallet 2007 (56)                                     | Meta-analysis                                                                  | Is looking at elasticities of demand for alcohol, not the effectiveness of MUP.                               |
|                    | Gray 2000 (57)                                       | Natural experiment                                                             | Restrictions do not include any price interventions                                                           |
|                    | Gruenewald 2006 (58)                                 | Time series analysis/modelling                                                 | Price changes, not minimum prices, but included in narrative                                                  |
|                    | Hilton 2014 (59)                                     | Content analysis of UK newsprint                                               | Media representations of MUP, not effectiveness                                                               |
|                    | Home Office 2011 (60)                                | 'Summary review'/report (not a research study)                                 | Replicates what we have elsewhere, but in less detail. Also not a research study.                             |
|                    | Institute for Fiscal Studies 2011 (61)               | Report (not a research study)                                                  | Is not about effectiveness of MUP                                                                             |
|                    | Institute for Fiscal Studies 2013 (62)               | Report (not a research study)                                                  | Is not looking at effectiveness of MUP, is comparing Govt and industry revenue under MUP and higher tax       |
|                    | Institute of Alcohol Studies (Goodliffe) 2014 (63)   | Webpage                                                                        | Is discussing legal issues, not effectiveness of MUP                                                          |
|                    | Kisely & Lawence 2015 (64)                           | Natural experiment                                                             | Tax, not price intervention                                                                                   |
| Ludbrook 2010 (65) | Secondary analysis of Expenditure and Food Survey    | Describes purchasing patterns of low price alcohol in Scotland. Not about MUP. |                                                                                                               |
| Ornstein 1983 (66) | Literature review book chapter (not systematic)      | Price elasticities of demand only                                              |                                                                                                               |

|  |                                              |                                          |                                                                                                                            |
|--|----------------------------------------------|------------------------------------------|----------------------------------------------------------------------------------------------------------------------------|
|  | Rabinovch 2012 (67)                          | Technical report (contains data)         | Does not assess effectiveness of MUP                                                                                       |
|  | Radaev 2015 (68)                             | Time series analysis                     | Paper explored the effect of price interventions on consumption of homemade alcohol, not the effectiveness of MUP          |
|  | Robinson 2013 (69)                           | Letter to journal (not a research study) | Letter to editor about evidence for MUP, not a research study                                                              |
|  | Snowdon 2015 (70)                            | Book chapter                             | Is a critique of Sheffield modelling, not a research study. Institute of Economic Affairs also has a conflict of interest. |
|  | Wine and Spirits Trade Association n.d. (71) | Press release                            | Press release critiquing Zhao 2013 paper, not a research study                                                             |
|  | World Health Organisation 2014 (72)          | Report                                   | Does not discuss effectiveness of MUP                                                                                      |

## References

1. Aage H. Alcohol in Greenland 1951–2010: consumption, mortality, prices. *Int J Circumpolar Health* [Internet]. 2012 Dec 17 [cited 2016 Feb 27];71. Available from: <http://www.ncbi.nlm.nih.gov/pmc/articles/PMC3525923/>
2. Ayyagari P, Deb P, Fletcher J, Gallo W, Sindelar JL. Understanding heterogeneity in price elasticities in the demand for alcohol for older individuals. *Health Econ*. 2013 Jan;22(1):89–105.
3. Bellis MA, Phillips-Howard PA, Hughes K, Hughes S, Cook PA, Morleo M, et al. Teenage drinking, alcohol availability and pricing: a cross-sectional study of risk and protective factors for alcohol-related harms in school children. *BMC Public Health*. 2009 Oct 9;9(1):1–12.
4. Bennetts R. Russell Bennetts. Alcohol: Price, Policy and Public Health. *Alcohol Alcohol*. 2008 Mar 1;43(2):123–123.
5. Burton R, Henn C, Lavoie D, O'Connor R, Perkins C, Sweeney K, et al. A rapid evidence review of the effectiveness and cost-effectiveness of alcohol control policies: an English perspective. *The Lancet* [Internet]. 2016 Dec 2 [cited 2017 Feb 17];0(0). Available from: [http://www.thelancet.com/journals/lancet/article/PIIS0140-6736\(16\)32420-5/abstract](http://www.thelancet.com/journals/lancet/article/PIIS0140-6736(16)32420-5/abstract)
6. Callinan S, Room R, Dietze P. Alcohol Price Policies as an Instrument of Health Equity: Differential Effects of Tax and Minimum Price Measures. *Alcohol Alcohol Oxf Oxfs*. 2015 Nov;50(6):629–30.
7. Casswell S, Huckle T, Wall M, Yeh LC. International alcohol control study: pricing data and hours of purchase predict heavier drinking. *Alcohol Clin Exp Res*. 2014 May;38(5):1425–31.
8. Chalmers J, Carragher N, Davoren S, O'Brien P. Real or perceived impediments to minimum pricing of alcohol in Australia: Public opinion, the industry and the law. *Int J Drug Policy*. 2013 Nov;24(6):517–23.
9. Chaloupka FJ, Grossman M, Saffer H. The effects of price on alcohol consumption and alcohol-related problems. *Alcohol Res Health J Natl Inst Alcohol Abuse Alcohol*. 2002;26(1):22–34.
10. Chick J. 16 for the Price of 10: Effects of a Ban on Multi-Buy Alcohol. *Alcohol Alcohol*. 2012 Feb 22;47(2):83–83.
11. Cook WK, Bond J, Greenfield TK. Are alcohol policies associated with alcohol consumption in low- and middle-income countries? *Addict Abingdon Engl*. 2014 Jul;109(7):1081–90.
12. Duffy M. The influence of prices, consumer incomes and advertising upon the demand for alcoholic drink in the United Kingdom: an econometric study. *Alcohol Alcohol*. 1981 Sep 21;16(4):200–9.
13. Giesbrecht N, Greenfield TK. Preventing Alcohol-Related Problems in the US Through Policy: Media Campaigns, Regulatory Approaches and Environmental Interventions. *J Prim Prev*. 2003 Sep;24(1):63–104.

14. Giesbrecht N, Wettlaufer A, Thomas G, Stockwell T, Thompson K, April N, et al. Pricing of alcohol in Canada: A comparison of provincial policies and harm-reduction opportunities. *Drug Alcohol Rev.* 2015 Nov 4;
15. Giesbrecht N, Wettlaufer A, Thomas G, Stockwell T, Thompson K, April N, et al. Pricing of alcohol in Canada: A comparison of provincial policies and harm-reduction opportunities. *Drug Alcohol Rev.* 2016 May;35(3):289–97.
16. Gilligan C, Kuntsche E, Gmel G. Adolescent drinking patterns across countries: associations with alcohol policies. *Alcohol Alcohol Oxf Oxf.* 2012 Dec;47(6):732–7.
17. Grossman M. Individual Behaviors and Substance Use: The Role of Price [Internet]. National Bureau of Economic Research; 2004 Dec [cited 2016 Feb 27]. Report No.: 10948. Available from: <http://www.nber.org/papers/w10948>
18. Hadland SE, Xuan Z, Blanchette JG, Heeren TC, Swahn MH, Naimi TS. Alcohol Policies and Alcoholic Cirrhosis Mortality in the United States. *Prev Chronic Dis* [Internet]. 2015 Oct 15 [cited 2016 Feb 27];12. Available from: [http://www.cdc.gov/pcd/issues/2015/15\\_0200.htm](http://www.cdc.gov/pcd/issues/2015/15_0200.htm)
19. Heeb J-L, Gmel G, Zurbrügg C, Kuo M, Rehm J. Changes in alcohol consumption following a reduction in the price of spirits: a natural experiment in Switzerland. *Addict Abingdon Engl.* 2003 Oct;98(10):1433–46.
20. Hogan E, BOFFA J, ROSEWARNE C, BELL S, CHEE DA. What price do we pay to prevent alcohol-related harms in Aboriginal communities? The Alice Springs trial of liquor licensing restrictions. *Drug Alcohol Rev.* 2006;25(3):207–212.
21. Jónsson RM, Kristjánsson S. Alcohol policy and public opinion in Iceland, 1989–2012. *Nord Stud Alcohol Drugs.* 2013;30(6):539–549.
22. Katikireddi SV, McLean JA. Introducing a minimum unit price for alcohol in Scotland: considerations under European Law and the implications for European public health. *Eur J Public Health.* 2012 Aug 1;22(4):457–8.
23. Katikireddi SV, Bond L, Hilton S. Perspectives on econometric modelling to inform policy: a UK qualitative case study of minimum unit pricing of alcohol. *Eur J Public Health.* 2014 Jun 1;24(3):490–5.
24. Khaltourina D, Korotayev A. Effects of Specific Alcohol Control Policy Measures on Alcohol-Related Mortality in Russia from 1998 to 2013. *Alcohol Alcohol.* 2015 Sep 1;50(5):588–601.
25. Knibbe RA, Derickx M, Allamani A, Massini G. Alcohol Consumption and its Related Harms in the Netherlands Since 1960: Relationships With Planned and Unplanned Factors. *Subst Use Misuse.* 2014 Oct 15;49(12):1589–600.
26. Lindeman M, Karlsson T, Österberg E. Public opinions, alcohol consumption and policy changes in Finland, 1993–2013. *Nord Stud Alcohol Drugs.* 2013;30(6):507–524.

27. Lonsdale AJ, Hardcastle SJ, Hagger MS. A minimum price per unit of alcohol: A focus group study to investigate public opinion concerning UK government proposals to introduce new price controls to curb alcohol consumption. *BMC Public Health*. 2012 Nov 23;12(1):1023.
28. Mäkelä P, Osterberg E. Weakening of one more alcohol control pillar: a review of the effects of the alcohol tax cuts in Finland in 2004. *Addict Abingdon Engl*. 2009 Apr;104(4):554–63.
29. McCambridge J, Hawkins B, Holden C. Vested Interests in Addiction Research and Policy. The challenge corporate lobbying poses to reducing society’s alcohol problems: insights from UK evidence on minimum unit pricing. *Addiction*. 2014 Feb 1;109(2):199–205.
30. Meng Y, Brennan A, Purshouse R, Hill-McManus D, Angus C, Holmes J, et al. Estimation of own and cross price elasticities of alcohol demand in the UK--A pseudo-panel approach using the Living Costs and Food Survey 2001-2009. *J Health Econ*. 2014 Mar;34:96–103.
31. Nelson JP. Does Heavy Drinking by Adults Respond to Higher Alcohol Prices and Taxes? A Survey and Assessment. *Econ Anal Policy*. 2013 Dec;43(3):265–91.
32. Nelson JP. Alcohol Affordability and Alcohol Demand: Cross-Country Trends and Panel Data Estimates, 1975 to 2008. *Alcohol Clin Exp Res*. 2014 Apr 1;38(4):1167–75.
33. Nelson JP. Estimating the Price Elasticity of Beer: Meta-Analysis of Data with Heterogeneity, Dependence, and Publication Bias [Internet]. Rochester, NY: Social Science Research Network; 2013 Jan [cited 2016 Feb 27]. Report No.: ID 2200492. Available from: <http://papers.ssrn.com/abstract=2200492>
34. Nelson JP. Gender differences in alcohol demand: a systematic review of the role of prices and taxes. *Health Econ*. 2014 Oct;23(10):1260–80.
35. Nelson JP, McNall AD. What happens to drinking when alcohol policy changes? A review of five natural experiments for alcohol taxes, prices, and availability. *Eur J Health Econ*. 2016 Apr 7;1–18.
36. Nicholls J, Greenaway J. What is the problem?: Evidence, politics and alcohol policy in England and Wales, 2010–2014. *Drugs Educ Prev Policy*. 2015 Mar 4;22(2):135–42.
37. Record C, Day C. Britain’s alcohol market: how minimum alcohol prices could stop moderate drinkers subsidising those drinking at hazardous and harmful levels. *Clin Med*. 2009 Oct 1;9(5):421–5.
38. Rush B, Steinberg M, Brook R. The relationships among alcohol availability, alcohol consumption and alcohol-related damage in the Province of Ontario and the State of Michigan 1955-1982. *Adv Alcohol Subst Abuse*. 1986;5(4):33–45.
39. Shi Y. Three Essays on Economics of Health Behavior in China [Internet]. 2011 [cited 2016 Mar 20]. Available from: [http://www.rand.org/pubs/rgs\\_dissertations/RGSD287.html](http://www.rand.org/pubs/rgs_dissertations/RGSD287.html)
40. Skov SJ, Chikritzhs TN, Kypri K, Miller PG, Hall WD, Daube MM, et al. Is the “alcopops” tax working? Probably yes but there is a bigger picture. *Med J Aust* [Internet]. 2011 [cited 2015 Nov

9];195(2). Available from: <https://www.mja.com.au/journal/2011/195/2/alcopops-tax-working-probably-yes-there-bigger-picture>

41. Sloan FA, Reilly BA, Schenzler C. Effects of prices, civil and criminal sanctions, and law enforcement on alcohol-related mortality. *J Stud Alcohol*. 1994 Jul;55(4):454–65.
42. Stockwell T, Williams N, Pauly B. Working and waiting: Homeless drinkers responses to less affordable alcohol. *Drug Alcohol Rev*. 2012 Sep 1;31(6):823–4.
43. Stockwell T, Zhao J, Martin G, Macdonald S, Vallance K, Treno A, et al. Misleading UK alcohol industry criticism of Canadian research on minimum pricing. *Addiction*. 2013 Jun 1;108(6):1172–3.
44. Sutton M, Godfrey C. A grouped data regression approach to estimating economic and social influences on individual drinking behaviour. *Health Econ*. 1995 May 1;4(3):237–47.
45. Tian G, Liu F. Is the demand for alcoholic beverages in developing countries sensitive to price? Evidence from China. *Int J Environ Res Public Health*. 2011 Jun;8(6):2124–31.
46. Wall M, Casswell S. Affordability of alcohol as a key driver of alcohol demand in New Zealand: a co-integration analysis. *Addict Abingdon Engl*. 2013 Jan;108(1):72–9.
47. Xuan Z, Blanchette J, Nelson TF, Heeren T, Oussayef N, Naimi TS. The alcohol policy environment and policy subgroups as predictors of binge drinking measures among US adults. *Am J Public Health*. 2015 Apr;105(4):816–22.
48. Yashkin A. The Dynamics of Alcohol Consumption in the Russian Federation: Implications of Using Price Related Policies to Control Alcohol Use. *Grad Theses Diss [Internet]*. 2013 Jan 1; Available from: <http://scholarcommons.usf.edu/etd/4968>
49. Ally AK, Meng Y, Chakraborty R, Dobson PW, Seaton JS, Holmes J, et al. Alcohol tax pass-through across the product and price range: do retailers treat cheap alcohol differently? *Addiction*. 2014 Dec 1;109(12):1994–2002.
50. Anderson P, Chisholm D, Fuhr DC. Effectiveness and cost-effectiveness of policies and programmes to reduce the harm caused by alcohol. *Lancet Lond Engl*. 2009 Jun 27;373(9682):2234–46.
51. Byrnes J, Shakeshaft A, Petrie D, Doran C. Can harms associated with high-intensity drinking be reduced by increasing the price of alcohol? *Drug Alcohol Rev*. 2013 Jan;32(1):27–30.
52. Centre for Economics and Business Research. Minimum Alcohol Pricing: A targeted measure? Report to the Scottish Parliamentary Health and Sport Committee [Internet]. London; 2010 Aug. Available from: <http://www.ias.org.uk/uploads/pdf/Price%20docs/Updated-Sheffield-Scotland-v2-August-20103.pdf>
53. Craven BM, Marlow ML, Shiers AF. The Economics of Minimum Pricing for Alcohol. *Econ Aff*. 2013 Jun 1;33(2):174–89.

54. Duffy J, Snowdon C. The minimal evidence for minimum pricing [Internet]. Adam Smith Institute; Available from: [http://www.adamsmith.org/sites/default/files/research/files/ASI\\_SAPM.pdf](http://www.adamsmith.org/sites/default/files/research/files/ASI_SAPM.pdf)
55. Fitzgerald N, Angus C. Four Nations: How Evidence-based are Alcohol Policies and Programmes across the UK?. London: [Internet]. London: Alliance for Useful Evidence/Alcohol Health Alliance.; 2015. Available from: <http://www.alliance4usefulevidence.org/assets/Four-Nations-v3.pdf>
56. Gallet CA. The Demand for Alcohol: A Meta-Analysis of Elasticities [Internet]. Rochester, NY: Social Science Research Network; 2007 May [cited 2016 Jan 6]. Report No.: ID 985689. Available from: <http://papers.ssrn.com/abstract=985689>
57. Gray D, Siggers S, Atkinson D, Sputore B, Bourbon D. Beating the grog: an evaluation of the Tennant Creek liquor licensing restrictions. *Aust N Z J Public Health*. 2000 Feb;24(1):39–44.
58. Gruenewald PJ, Ponicki WR, Holder HD, Romelsjö A. Alcohol prices, beverage quality, and the demand for alcohol: quality substitutions and price elasticities. *Alcohol Clin Exp Res*. 2006 Jan;30(1):96–105.
59. Hilton S, Wood K, Patterson C, Katikireddi SV. Implications for alcohol minimum unit pricing advocacy: What can we learn for public health from UK newsprint coverage of key claim-makers in the policy debate? *Soc Sci Med*. 2014 Feb;102:157–64.
60. Home Office. The likely impacts of increasing alcohol price: a summary review of the evidence base [Internet]. 2011 Jan. Available from: [https://www.gov.uk/government/uploads/system/uploads/attachment\\_data/file/98100/impacts-alcohol-price-review.pdf](https://www.gov.uk/government/uploads/system/uploads/attachment_data/file/98100/impacts-alcohol-price-review.pdf)
61. Institute for Fiscal Studies. Alcohol pricing and taxation policies. IFS Briefing Note BN124. 2011.
62. Institute for Fiscal Studies. Price-based measures to reduce alcohol consumption. IFS Briefing Note BN138. 2013.
63. Goodliffe J. Applying a minimum price to alcohol (Institute of Alcohol Studies) [Internet]. 2014. Available from: <http://www.ias.org.uk/What-we-do/Publication-archive/Alcohol-Alert/October-2014/Applying-a-minimum-price-to-alcohol.aspx>
64. Kisely S, Lawrence D. A time series analysis of alcohol-related presentations to emergency departments in Queensland following the increase in alcopops tax. *J Epidemiol Community Health*. 2015 Sep 16;jech-2015-205666.
65. Ludbrook A. Purchasing Patterns for Low Price Off Sales Alcohol: Evidence from the Expenditure and Food Survey [Internet]. Available from: <http://www.shaap.org.uk/images/UserFiles/File/Reports%20and%20Briefings/Briefing%20-%20Purchase%20of%20low-price%20alcohol%20analysis.pdf>
66. Ornstein SI, Levy D. Price and Income Elasticities of Demand for Alcoholic Beverages. In: Galanter M, Begleiter H, Cicero T, Deitrich R, Goodwin DW, Gottheil E, et al., editors. *Genetics Online supplementary file to Boniface S, Scannell JW, Marlow S: Evidence for the effectiveness of minimum pricing of alcohol: a systematic review and assessment using the Bradford Hill criteria for causality*

Behavioral Treatment Social Mediators and Prevention Current Concepts in Diagnosis [Internet]. Boston, MA: Springer US; 1983. p. 303–45. Available from: [http://dx.doi.org/10.1007/978-1-4613-3617-4\\_18](http://dx.doi.org/10.1007/978-1-4613-3617-4_18)

67. Rabinovich L, Brutscher P-B, de Vries H, Tiessen J, Clift J, Reding A. The affordability of alcoholic beverages in the European Union. 2012;
68. Radaev V. Impact of a New Alcohol Policy on Homemade Alcohol Consumption and Sales in Russia. *Alcohol Alcohol*. 2015 May 1;50(3):365–72.
69. Robinson M, McCartney G, Beeston C. What is convincing evidence on alcohol pricing? *BMJ*. 2013 Aug 20;347:f5102.
70. Snowdon C. Chapter 10. Minimum unit pricing. In: *Flaws and Ceilings: Price controls and the damage they cause* [Internet]. [cited 2015 Nov 9]. p. 177–97. Available from: <http://www.iea.org.uk/publications/research/flaws-and-ceilings-price-controls-and-the-damage-they-cause>
71. Wine and Spirits Trade Association. New claims that increasing the cost of alcohol saves lives are misleading [Internet]. Available from: <http://www.wsta.co.uk/press/634-new-claims-that-increasing-the-cost-of-alcohol-saves-lives-are-misleading>
72. World Health Organization. European status report on alcohol and health 2014. Pricing policies [Internet]. World Health Organization; 2014. Available from: [http://www.euro.who.int/\\_\\_data/assets/pdf\\_file/0003/244902/Pricing-policies.pdf](http://www.euro.who.int/__data/assets/pdf_file/0003/244902/Pricing-policies.pdf)
